# Supplementary material
Source: PubMed Central journal article supplement (PMC4664323)
Supplement: pnas.1518552112.sapp.pdf [file pnas.1518552112.sapp.pdf]

# Chromatin extrusion explains key features of loop and domain formation in wild-type and engineered genomes – SI Appendix

Adrian L. Sanborn<sup>a,b,c,1</sup>, Suhas S. P. Rao<sup>a,d,1</sup>, Su-Chen Huang<sup>a</sup>, Neva C. Durand<sup>a,2</sup>, Miriam H. Huntley<sup>a,2</sup>, Andrew I. Jewett<sup>a,2</sup>, Ivan D. Bochkov<sup>a</sup>, Dharmaraj Chinnappan<sup>a</sup>, Ashok Cutkosky<sup>a</sup>, Jian Li<sup>a,b</sup>, Kristopher P. Geeting<sup>a</sup>, Andreas Gnirke<sup>e</sup>, Alexandre Melnikov<sup>e</sup>, Doug McKenna<sup>a,f</sup>, Elena K. Stamenova<sup>a,e</sup>, Eric S. Lander<sup>e,3</sup>, Erez Lieberman Aiden<sup>a,b,e,3</sup>

<sup>a</sup>The Center for Genome Architecture, Baylor College of Medicine, Houston, TX 77030, USA; <sup>b</sup>Center for Theoretical Biological Physics, Rice University, Houston, TX 77030, USA; <sup>c</sup>Department of Computer Science, Stanford University, Stanford, CA 94305, USA; <sup>d</sup>School of Medicine, Stanford University, Stanford, CA 94305, USA; <sup>e</sup>Broad Institute of MIT and Harvard, Cambridge, MA 02139, USA; <sup>f</sup>Mathemaesthetics, Inc., Boulder, CO 80306, USA; <sup>1</sup>A.L.S. and S.S.P.R. contributed equally to this work; <sup>2</sup>N.C.D., M.H.H., and A.I.J. contributed equally to this work; <sup>3</sup>To whom correspondence may be addressed. Email: lander@broadinstitute.org or erez@erez.com.

## Table of Contents

### I. Experimental Methods

- a. Hi-C
  - i. Previously generated Hi-C data
  - ii. New Hi-C data sets
- b. Nuclear Volume
- c. 3D DNA FISH
- d. CRISPR workflow
  - i. Experimental Design
  - ii. Guide RNA and HDR template design
  - iii. Cell culture and transfection
  - iv. Mutation strategy
  - v. in situ Hi-C on mutated cell lines
- e. Hi-C<sup>2</sup>
  - i. Probe design
  - ii. Probe construction
  - iii. Hybrid selection
  - iv. Hi-C<sup>2</sup> data processing

### II. Computational analysis of Hi-C maps

- a. Measurements of chromatin flexibility
  - i. Cyclization probability measurements
  - ii. Cyclization probability is consistent across compartments
  - iii. Contact probability decays at distances greater than 5kb
  - iv. Cyclization probability data are inconsistent with the 30-nm fiber
  - v. Experimental ionic conditions are comparable to physiological conditions
- b. Measurements of local contact probability
  - i. Definition of contact probability
  - ii. Local contact probability scalings are highly reproducible
  - iii. Contact probability within domains exhibits a power law with  $\gamma \approx 0.75$
  - iv. Directional contact probability exhibits similar values of  $\gamma$
  - v. Values of  $\gamma$  are consistent across compartments
  - vi. Aggregate measures of contact probability consistently overestimate  $\gamma$

- c. Fractal models are inconsistent with intra-domain contact probability
- d. Analysis of chromatin loop networks
  - i. Hubs are detected are (nearly) isolated cliques in the loop network
  - ii. An extended list of loops accounts for false negative loops
  - iii. Hubs often involve a series of consecutive loops
  - iv. Hubs are consistent with looping between pairs of convergent CTCF motifs
  - v. Middle loci of hubs show strong enrichment for pairs of divergent CTCF motifs
  - vi. All observed effects are highly enriched over suitable null models
  - vii. An "exclusion domain" often forms between two loci that loop to a common third locus

### III. Polymer simulations

- a. Molecular dynamics simulations
  - i. Polymer properties
  - ii. Simulation dynamics
  - iii. Simulations of tension globules
  - iv. Simulations of fractal globules
  - v. Simulations of tension globule loop domains
  - vi. Simulations of loop extrusion
- b. Simulated CTCF binding locations
  - i. Assigning extrusion complex binding strengths from CTCF ChIP-Seq tracks
  - ii. Assigning tension globule loops from CTCF ChIP-Seq tracks
- c. Analysis of the tension globule
  - i. Tension globule contact probability matches experimental observations
  - ii. Contact probability scalings are robust to changes in simulation parameters
  - iii. The tension globule exhibits a linear axis
  - iv. The tension globule is unknotted
  - v. Tension vs. fractal structure depends on ratio of internal and external forces
  - vi. Contact probability of simulated loop domains matches experimental observations
- d. Analysis of the extrusion model
  - i. Contact probability of extruded domains matches experimental observations
  - ii. The extrusion model accurately recapitulates Hi-C contact maps, including loops and domains

- iii. The extrusion model accurately predicts changes in 3D structure after CRISPR editing
  - iv. These properties are robust to changes in the attractive forces and the initial configuration
  - v. The extrusion model predicts that loops will be intra-chromosomal and tend to be short
  - vi. Loop extrusion promotes an unentangled, unknotted topology
  - e. The tension globule and the extrusion model are consistent with 3D DNA FISH measurements
  - f. SMC3 and RAD21 are positioned on loop anchors 20bp towards the loop interior
  - g. Monte Carlo simulations of large fractal globules using Confined-BFACF
- IV. Mathematical theory
- a. Introduction
  - b. Construction of self-similar curves
  - c. Dimension scaling theorem for self-similar curves
    - i. Overview
    - ii. An upper bound on  $\dim f(X)$
    - iii. A lower bound on  $\dim f(X)$
  - d. Derivation of contact probability critical exponent for self-similar paths
    - i. Dimension of the contact map derives from surface dimension
    - ii. Contact probability measures the contact map dimension
    - iii. Appendix: proofs
  - e. Novel curves
    - i. Construction of space-filling curves using tiling
    - ii. Rough-boundaried space-filling curves
    - iii. Inside-Out Hilbert curves

## I. Experimental Methods

### a. Hi-C

Most of the Hi-C datasets used in our analyses were generated using either the *in situ* Hi-C protocol or the dilution Hi-C protocol in our previous study (8) (GEO accession GSE63525). All of the Hi-C data was processed using the computational pipeline described in full detail in (8). In brief, the pipeline uses BWA (S1) to map each read end separately to the b37 reference genome, removes duplicate and near-duplicate reads, removes reads that map to the same fragment, and filters the remaining reads based on mapping quality score. Contact matrices were generated at base pair delimited resolutions of 2.5Mb, 1Mb, 500kb, 250kb, 100kb, 50kb, 25kb, 10kb, and 5kb, as well as fragment-delimited resolutions of 500f, 200f, 100f, 50f, 20f, 5f, 2f, and 1f. All Hi-C contact matrices were normalized using a matrix balancing algorithm (S2) in order to correct for coverage biases. All analyses performed in this study were performed on the KR-normalized data. The locations of contact domains and loops used in our analyses were annotated as described in (8).

#### i. Previously generated Hi-C data

The primary Hi-C map used in our analyses was a one-kilobase resolution map consisting of over 4.9 billion contacts, generated in the GM12878 human lymphoblastoid cell line using the MboI restriction enzyme. All analyses involving contact domains in this map were performed using a list of 9,274 domains annotated via the Arrowhead algorithm. Hi-C maps and domain annotations generated in the IMR90, K562, HeLa, HMEC, and NHEK cell lines using *in situ* Hi-C and the MboI restriction enzyme were also used for supplementary analysis. In addition, *in situ* Hi-C data sets generated in GM12878 using the DpnII restriction enzyme and dilution Hi-C data sets generated in the GM12878 cell line using the dilution Hi-C protocol and the HindIII or NcoI restriction enzymes were also used for analysis of single-fragment cyclization probabilities. Native Hi-C data sets (with no crosslinking) generated in GM12878 using the MboI restriction enzyme were also used in the cyclization probabilities analysis as a control. All of these Hi-C datasets were previously reported in (8) and have been previously uploaded to GEO accession GSE63525. All domain and loop annotations from these previously reported maps that were used in this study are also available at GEO accession GSE63525.

#### ii. New Hi-C datasets

We also generated 6 additional Hi-C datasets using the *in situ* Hi-C protocol, varying the duration of crosslinking. In brief, the *in situ* Hi-C protocol involves crosslinking cells with formaldehyde, permeabilizing them with nuclei intact, digesting DNA with a suitable 4-cutter restriction enzyme (in our experiments we used MboI), filling the 5'-overhangs while incorporating a biotinylated nucleotide, ligating the resulting blunt-end fragments, shearing the DNA, capturing the biotinylated ligation junctions with streptavidin beads, and analyzing the resulting fragments with paired-end sequencing. In order to test the possibility that the strength of formaldehyde crosslinking could affect the contact probability scalings observed, we performed experiments using 1, 5, or 10 minutes of crosslinking with 1% formaldehyde at 22C or 37C. For each experiment, we computed the genome-wide contact probability scaling (defined below) at distances from 30kb to 300kb and compared to contact probability of the primary map (crosslinked at 22C for 10 minutes). The values of  $\gamma$  obtained are listed in Table S2.

For our genome engineering experiments, we generated 5 *in situ* Hi-C libraries (using the same protocol from (8)) from Hap1 wild-type cells that were deeply sequenced to create our genome-wide wild-type Hap1 Hi-C map. We also generated 63 *in situ* Hi-C libraries from Hap1 wild-type and various mutant cell lines that we performed hybrid selection on to generate Hi-C<sup>2</sup> libraries (see section I.e below for information on the Hi-C<sup>2</sup> protocol).

All new *in situ* Hi-C libraries generated as part of this study are detailed in Table S6.

#### b. Nuclear Volume

All cell lines were cultured according to the supplier's instructions. Adherent cell lines were grown on the surface of pre-cleaned glass slides in the appropriate growth media, then stained with 2M CellTracker Red CMTPX fluorescent dye (Life Technologies, C34552) in fresh serum-free medium for 45 minutes at 37C, 5% CO<sub>2</sub>. Suspension cell lines were harvested by centrifugation at 300xG for 5 minutes and re-suspended in serum-free medium with CellTracker Red for staining, as above. After incubation, medium with dye was removed and cells were again incubated in fresh medium for 30 minutes. Cells were then washed with 1X phosphate-buffered saline (PBS) and fixed in 4% formaldehyde in 1X PBS for 15

minutes at ambient temperature. After fixation, cells were washed twice with 1X PBS. Suspension cell lines were diluted to a concentration of  $1 \times 10^6$  cells/mL in 1X PBS and were allowed to attach to the surface of poly-L-lysine coated microscope slides. Nuclei were stained with DAPI (100ng/mL) for 30 minutes at ambient temperature in the dark. Slides were imaged with either an LSM 700 or an LSM 780 laser scanning inverted confocal microscope (Zeiss), 40X oil objective, ZEN 2011 imaging software (Zeiss), at 405nm and 594nm. Nuclear and cytoplasmic volumes were determined using Volocity v.6 software (Perkin Elmer). The intensity threshold of each channel was kept constant for all measurements.

### c. 3D DNA FISH

3D DNA fluorescence *in situ* hybridization (FISH) was performed essentially as described in (8), based on the Oligopaints method of (S3). Briefly, probes were designed with OligoArray as a pool of 32bp sequences tiling nine 30kb target loci (3 per region at a density of 9-16 probes per kilobase), flanked by 21bp primer sequences unique to each locus (Table S5). The 74bp full sequences were ordered as an oligonucleotide pool (CustomArray, Inc.). Forward primers were synthesized with a 5' conjugated fluorophore (Alexa Fluor 488, ATTO 565, or Alexa Fluor 647) and purified by HPLC (Integrated DNA Technologies). IMR90 cells were cultured on Lab-Tek II glass chamber slides (Thermo Fisher Scientific). Further details on experimental procedures (including measures to minimize bias due to chromatic aberration), microscopy, and image processing can be found in (8).

### d. CRISPR workflow

In brief, our CRISPR workflow consisted of the following steps: (i) identifying chromatin loops using HiCCUPS (8), (ii) identifying unique, correctly oriented CTCF motifs within loop anchors (as defined in (8)), (iii) rationally designing a CRISPR guide RNA or multiple guide RNAs to cut within or around the CTCF motif while optimizing for cutting efficiency and minimizing off-target effects, (iv) optionally designing homology directed repair (HDR) templates to specifically invert or replace the CTCF motif, (v) transfecting cells with the Cas9 and the guide RNA(s) (and optionally the HDR template), (vi) sorting single transfected cells via fluorescence-activated cell sorting (FACS), (vii) growing up and genotyping clonal populations of cells, (viii) selecting clonal cell lines with mutations disrupting the CTCF motif (or in the case of HDR, the specific desired mutation), (ix) performing *in situ* Hi-C on the selected mutated cell lines, and (x) performing hybrid selection on the *in situ* Hi-C libraries for a region around the targeted CTCF motif to generate Hi-C<sup>2</sup> libraries that can easily and cheaply be sequenced to read off the effects of our mutations on genome folding.

While we performed our CRISPR experiments in the Hap1 cell line to be able to read off the effects of our mutations without having to worry about allelic heterozygosity, our CRISPR workflow is easily adaptable to other cell lines, as long as one has a reasonable Hi-C map to identify loops and guide predictions (in fact, since our extrusion model is very good at predicting genome folding from CTCF ChIP-Seq alone, in many cases the requirement for Hi-C data may not even be essential). The steps in our workflow are described in detail below.

### i. Experimental Design

Three regions containing triple-hubs (three loci A, B and C with all pair-wise loops present) were chosen for thorough dissection. Since we did not have CTCF or cohesin ChIP-Seq

data for Hap1, the regions were chosen such that they showed extremely similar patterns of chromatin folding to GM12878 and IMR90, so that ChIP-Seq data from those cell lines could be used to identify precise motifs in loop anchors to target as well as to simulate folding in the regions (see section III.d.iii below).

The three hubs were chosen such that unique anchors (as defined in (8)) were present at least at the middle loop anchor and ideally at one of the upstream or downstream loop anchors as well. Motifs in loop anchors were identified using FIMO (S4) using the CTCF motif position weight matrices (PWMs) from Kim, et al (S5) and Schmidt, et al (S6). The hubs were chosen such that all loops were clearly anchored by correctly oriented motifs. Motifs to target via CRISPR were only chosen if they were clearly unique among the correctly oriented motifs in a ChIP-Seq binding site (i.e. there was only one motif present or only one motif that was clearly the strongest match when compared against both PWMs and in the case of the middle loop anchor, the reverse CTCF motif corresponding to the A-B loop was upstream of the forward CTCF motif corresponding to the B-C loop).

Targeted motifs and regions are listed in Table S7 and S8.

### ii. Guide RNA and HDR template design

Guide RNAs were designed using one of two strategies: (i) a single guide RNA was designed to cut inside the target CTCF motif or (ii) two guide RNAs were designed to cut flanking both sides of the target CTCF motif.

Prospective guide RNAs were screened using the cutting efficiency scoring scheme from Doench, et al (S7) and the off-target scoring scheme from Hsu, et al (S8). Wherever possible, guides with cutting efficiency scores of 0.4 or lower were avoided, and guide RNAs with scores of lower than 0.25 were discarded altogether. Wherever possible, guides ranked as high quality guides by the Hsu off target assessment algorithm were used. In a few cases, where no high quality guide was identified or when the cutting efficiency as ranked by the Doench, et al algorithm was extremely low, a mid-quality guide (with respect to off-targets) was used.

Guide RNAs for all mutations are listed in table S7.

All the HDR templates used in this study were ssODNs (S9), either 200bp (IDT ultramers) or 100bp (Invitrogen custom DNA oligonucleotides) in size. They were designed such that they contained the 20bp CTCF motif inverted (or a new 20bp CTCF motif), flanked by homology arms either 90bp or 40bp in size.

### iii. Cell culture and transfection

This culture and transfection protocol was used for the 8 mutated cell lines generated entirely within our lab; 5 of the mutated cell lines were ordered from Horizon Genomics and created using their proprietary methods (see Table S7). The experimental design and guide RNA design for all 13 experiments was conducted as described above.

Hap1 cells (Horizon Genomics) were cultured according to manufacturer's conditions. 24 hours before transfection, 0.9M Hap1 cells were plated in each well of a 6 well plate. After 24 hours, when the cells were roughly 60% confluent, the cells were transfected with the pSpCas9(BB)-2A-GFP (px458) plasmid from the Zhang lab (S9). Guide RNAs were cloned into the plasmid using the protocol provided at <http://www.genome-engineering.org/crispr/wp-content/uploads/2014/05/CRISPR-Reagent-Description-Rev20140509.pdf> (14).

The Hap1 cells were transfected (in antibiotic free media) with 3 $\mu$ g of DNA using Turbofectin according to manufacturer's instructions (a 3:1 ratio of Turbofectin to DNA was used; 9 $\mu$ l of Turbofectin for 3 $\mu$ g of DNA). For single guide

RNAs, 3 $\mu$ g of the Cas9-gRNA plasmid was used. For double guide RNA mediated deletions, 1.5 $\mu$ g of each Cas9-gRNA plasmid was used. For HDR, either 1.5 $\mu$ g of Cas9-gRNA plasmid and 3 $\mu$ l 10 $\mu$ M 200bp ssODN or 1.875 $\mu$ g Cas9-gRNA plasmid and 3.75 $\mu$ l 10 $\mu$ M 100bp ssODN were used. For HDR experiments, the culture media was supplemented with 0.1 $\mu$ M SCR7 (S10, S11) 12-24 hours after transfection.

24-48 hours after transfection, GFP+ cells were sorted via FACS (PI was also added to filter for dead cells). Transfection efficiencies were usually between 5 and 10%. Populations of 500-10,000 cells were screened for gRNA cutting efficiency or for HDR efficiency to judge roughly how many clones would need to be screened. Single cells were sorted into individual wells of a 96-well plate and allowed to grow for 10-14 days. After that, roughly 32-96 clones were screened per transfection.

#### iv. Mutation strategy

Deletions were obtained either via a single guide RNA-mediated cut within the CTCF motif or via two guide RNAs-mediated double strand breaks on either side of the CTCF motif. In the case of the single guide RNA mediated cuts, clones were screened for mutations that were as small as possible, but also highly likely to completely disrupt CTCF binding (as judged by the strength of the motif match before and after mutation). Mutations that were likely to completely abrogate CTCF binding were selected for expansion. Mutations generated via two double strand breaks were all generated by Horizon Genomics and clones containing the region between the two guide RNAs either cut out or inverted were selected for expansion. Clones targeted with HDR were screened for the 20bp inversion or 20bp replacement and successfully targeted clones were selected for expansion.

#### v. *in situ* Hi-C on mutated cell lines

Expanded mutant clones were crosslinked as in (8) and subsequently *in situ* Hi-C was performed on the pellets as described in (8) and summarized above. On average, 4.3 *in situ* Hi-C libraries were generated per mutated cell line for a total of 56 *in situ* Hi-C libraries.

### e. Hi-C<sup>2</sup>

#### i. Probe design

To design probes targeting a particular region for HYbrid Capture Hi-C (Hi-C<sup>2</sup>), we first identified all restriction sites within the target region. Since Hi-C ligation junctions occur between restriction sites, we designed our bait probe sequences to target sequences within a certain distance of the (MboI) restriction sites present in our target region. Specifically, we performed a first pass, scanning all 120bp sequences with one end within 80bp of a restriction site and selecting, for each restriction end (i.e. both upstream and downstream of the restriction site), the closest 120bp sequence to the restriction site that had fewer than 10 repetitive bases (as determined by the repeat masked hg19 genome downloaded from UCSC) and had between 50% and 60% GC content. If there was no probe satisfying those criteria, the closest probe with between 40% and 70% GC content but satisfying all the other above criteria was retained. The GC content bounds were chosen based on the hybridization bias data presented in (28).

After the first pass, we removed one probe from any pair of probes that overlapped. We then identified any gaps in the probe coverage (intervals larger than 110bp) and identified any restriction sites falling within those gaps. We then searched for additional 120bp probes with a looser set of criteria: For each restriction site within a gap, we scanned all 120bp se-

quences with one end within 110bp of a restriction site and selected the closest sequence to the restriction site that had fewer than 20 repetitive bases and had between 40% and 70% GC content. After the second pass, we once again identified gaps of at least 110bp in the probe coverage. For gaps that fell within 5kb windows in the target region that were covered by fewer than 5 probes, we performed a third probe design pass. For each restriction site within these low coverage gaps, we scanned all 120bp sequences with one end within 110bp of a restriction site and selected the closest sequence to the restriction site that had fewer than 25 repetitive bases and had between 25% and 80% GC content.

After all three passes, we identified 3107 probes covering region 1 (chr8:133-135Mb; 1.55 probes/kb), 2666 probes covering region 2 (chr1:179.8-181.8Mb; 1.33 probes/kb), and 2497 probes covering region 3 (chr5:31-33Mb; 1.25 probes/kb). 15bp primer sequences (unique for each region) were appended to either end of the 120bp probe sequence in order to allow for synthesis of all probes together in one oligo pool and subsequent amplification of region-specific sub-pools (see below).

#### ii. Probe construction

We obtained custom synthesized pools of 150bp (120bp + 15bp primer sequence on either end) single stranded oligodeoxynucleotides from CustomArray, Inc. (Bothell, WA). The oligonucleotides were of the form TCGCGCCATAACTCN<sub>120</sub>CTGAGGGTCCGCCTT for Region 1, ATCGCACCAGCGTGTN<sub>120</sub>CAC TCGGGCTCCTCA for Region 2, and CCTCGCTATCCCATN<sub>120</sub>CAC TACCGGGTCTG for Region 3. Region-specific sub-pools were first amplified from the overall CustomArray oligo pool using the following mix and PCR profile:

2 $\mu$ l oligo pool (160 ng)  
6 $\mu$ l Primer 1 (10 $\mu$ M)  
6 $\mu$ l Primer 2 (10 $\mu$ M)  
36 $\mu$ l H<sub>2</sub>O  
50 $\mu$ l 2X Phusion master mix  
**100 $\mu$ l TOTAL**

Amplify for 10-18 cycles using the following PCR profile:

98C for 30s  
98C for 10s  
55C for 30s  
72C for 30s cycle 10-18 times  
72 for 7min  
hold at 4C

where Primer 1 was CTGGGATCGCGCCATAACTC for Region 1, CTGGGAATCGCACCAGCGTGT for Region 2, and CTGGGACCTCGCCTATCCCAT for Region 3 and Primer 2 was CGTGGAAAGGCGGACCCCTCAG for Region 1, CGTGGATGAGGAGCCGCAGTG for Region 2, CGTGGACAGACCCCGGTAGTG for Region 3.

After the initial amplification of the region-specific sub-pool, a 1X SPRI clean up was performed on the 162bp PCR product to remove primers and primer-dimers. We then performed a second PCR amplification to add a T7 promoter, using the following mix and PCR profile:

2 $\mu$ l first PCR product  
12 $\mu$ l Primer 1-T7 (10 $\mu$ M)  
12 $\mu$ l Primer 2 (10 $\mu$ M)  
74 $\mu$ l H<sub>2</sub>O  
100 $\mu$ l 2X Phusion master mix  
**200 $\mu$ l TOTAL**

Amplify for 12-18 cycles using the following PCR profile:

98C for 30s  
98C for 10s  
55C for 30s  
72C for 30s cycle 12-18 times  
72 for 7min  
hold at 4C

where Primer 1-T7 was GGATTCTAATACGACTCACTATAGGGTCGCGCCATAACTC for Region 1, GGATTCTAATACGACTCACTATAGGGATCGCACCAGCGTGT for Region 2, and GGATTCTAATACGACTCACTATAGGGCTCGCCTATCCCA for Region 3.

After the second PCR, once again, we performed a 1X SPRI clean up to purify the 182bp PCR product. We then used the purified second PCR product as the template in a MAXIScript T7 transcription reaction (Ambion) as follows:

X $\mu$ l purified DNA template (1 $\mu$ g)  
10 $\mu$ l T7 enzyme mix  
10 $\mu$ l 10X transcription buffer  
5 $\mu$ l 10mM ATP  
5 $\mu$ l 10mM CTP  
5 $\mu$ l 10mM GTP  
4 $\mu$ l 10mM UTP  
1 $\mu$ l 10mM Biotin-16-UTP  
Y $\mu$ l H<sub>2</sub>O  
**100 $\mu$ l TOTAL**

After incubating the reaction for at least 90 minutes at 37°C, we added 1 $\mu$ l of TURBO DNase 1 and incubated at 37°C for 15 minutes to remove template DNA. We added 1 $\mu$ l of 0.5M EDTA to stop the reaction and removed unincorporated nucleotides and desalted the RNA by purifying using a Zymo Oligo Clean and Concentrator column (following manufacturer's instructions). Our RNA yield was typically 5-15 $\mu$ g of RNA per reaction, so we measured the concentration of the RNA prior to the column cleanup using a Qubit RNA assay in order to determine whether to use one or two columns (the capacity of one of the Zymo columns is 10 $\mu$ g). For long-term storage of the RNA probes, we added 1U/ $\mu$ l of SUPERase-In RNase inhibitor (Ambion) and stored at -80C.

### iii. Hybrid selection

Final *in situ* Hi-C libraries were assessed for quality using the metrics outlined in Rao and Huntley, et al (8). High quality libraries of sufficient complexity were selected for hybrid capture. 500ng of Hi-C library was used as the pond for the hybrid selection reaction; libraries were diluted to a concentration of 20ng/ $\mu$ l (i.e. 25 $\mu$ l of library was used). For a few libraries that were under 20ng/ $\mu$ l in concentration, as low as 250ng total was used (still in 25 $\mu$ l).

For the hybridization reaction, 25 $\mu$ l of pond was mixed with 2.5 $\mu$ g (1 $\mu$ l) of Cot-1 DNA (Invitrogen) and 10 $\mu$ g (1 $\mu$ l) of salmon sperm DNA (Stratagene). The DNA mixture was heated to 95°C for 5 minutes and then held at 65°C for at least 5 minutes. After at least 5 minutes at 65°C, 33 $\mu$ l of prewarmed (65°C) hybridization buffer (10X SSPE, 10X Denhardt's buffer, 10mM EDTA, and 0.2% SDS) and 6 $\mu$ l of RNA probe mixture (500ng of RNA probes, 20U of SUPERase-In RNase inhibitor; prewarmed at 65°C for 2 minutes) were added to the DNA library for a total volume of 66 $\mu$ l. This mixture was incubated at 65°C in a thermocycler for 24 hours.

After 24 hours at 65°C, 50 $\mu$ l of streptavidin beads (Dynabeads MyOne Streptavidin T1, Life Technologies) were washed three times in 200 $\mu$ l of Bind-and-Wash buffer (1M

NaCl, 10mM Tris-HCl, pH 7.5, and 1mM EDTA) and then resuspended in 134 $\mu$ l of Bind-and-Wash buffer. The beads were added to the hybridization mixture and incubated for 30 minutes at room temperature (with occasional mixing to prevent the beads from settling). After 30 minutes, the beads were separated with a magnet and the supernatant discarded. The beads were then washed once with 200 $\mu$ l low-stringency wash buffer (1X SSC, 0.1% SDS) and incubated for 15 minutes at room temperature. After 15 minutes, the beads were separated on a magnet and the supernatant discarded. The beads were then washed three times in high-stringency wash buffer (0.1X SSC, 0.1%SDS) at 65°C for 10 minutes, each time separating the beads with a magnet and discarding the supernatant.

After the last wash, the DNA was eluted off the beads by resuspending in 50 $\mu$ l of 0.1M NaOH and incubating for 10 minutes at room temperature. After 10 minutes, the beads were separated on a magnet and the supernatant was transferred to a fresh tube with 50 $\mu$ l of 1M Tris-HCl, pH 7.5 (to neutralize the NaOH).

To desalt the DNA, we performed a 1X SPRI cleanup using 3X concentrated SPRI beads (taking 3 volumes of SPRI bead/solution mix, separating on a magnet, discarding 2 volumes of SPRI solution and resuspending the beads in the remaining 1 volume). We eluted the DNA in 22.5 $\mu$ l of 1X Tris buffer (10mM Tris-HCl, pH 8.0).

In order to prep the Hi-C<sup>2</sup> library for sequencing, we added 25 $\mu$ l of 2X Phusion and 2.5 $\mu$ l of Illumina primers and amplified the library for 12-18 cycles. After PCR, we performed two 0.7X SPRI cleanups to remove primers, etc. and then quantified the libraries for sequencing.

### iv. Hi-C<sup>2</sup> data processing

Hi-C<sup>2</sup> libraries were sequenced to a depth of between 600K-60M reads (on average, 7.8M reads). All data was initially processed using the pipeline published in our previous study (8); however, additional processing was needed to properly normalize the Hi-C<sup>2</sup> data.

Normalization is an important problem to address in the analysis and interpretation of all proximity ligation experiments. We have previously shown that matrix balancing with the KR algorithm is an effective tool for properly normalizing Hi-C data (8). However, one requirement of the KR algorithm is the requirement of a square symmetric matrix. As hybrid selection strongly enriches for certain rows of the matrix corresponding to the target region, there are large regions of the overall matrix that are extremely sparse (entries corresponding to interactions between two non-target loci). As a result, performing KR matrix balancing on the overall matrix generated by a Hi-C<sup>2</sup> experiment does not efficiently correct both first-order hybrid selection target-enrichment biases and second-order hybridization biases within the target region.

To deal with this, we utilized the high resolution genome-wide *in situ* Hi-C map of wild-type of Hap1 we had already generated. Since all genome-editing perturbations were made within the region targeted using Hi-C<sup>2</sup>, for every Hi-C<sup>2</sup> dataset, we spiked in data from the genome-wide wild-type Hap1 map corresponding to regions of the chromosome-wide matrix where both loci fall outside of the target region. Spiked data was added such that the average coverage of a locus in the overall chromosome-wide matrix was equal to the average coverage of loci within the target region. By spiking in data from the wild-type map where we expect to see no change (since there were no perturbations), we could remove the first-order bias from hybrid-selection target enrichment, and use KR matrix balancing on the entire chromosome-wide matrix (which is no longer extremely sparse) to correct the second-order hy-

bridization biases. Several different flavors of this normalization scheme were implemented yielding extremely similar results; they are described below and the results of the various normalizations are shown in Figure S14. Method e. below is the method used for all Hi-C<sup>2</sup> data shown in the main figures of this study.

*a. Raw gap-filling:* For a given resolution, the average intrachromosomal coverage of the loci within the target region (defined as the entire interval tiled by probes not specifically the loci that were covered by a probe) was calculated from the raw uncorrected Hi-C<sup>2</sup> matrix. Similarly, the average intrachromosomal coverage of all loci was calculated from the raw uncorrected genome-wide Hap1 wild-type Hi-C map. A matrix consisting of all entries corresponding to two loci that were both outside the target region was constructed from the raw uncorrected genome-wide Hap1 Hi-C map. This matrix was multiplied by the ratio of the average coverage of loci within the target region in the Hi-C<sup>2</sup> data to the average coverage of all loci from the genome-wide Hap1 wild-type Hi-C data and then summed with the Hi-C<sup>2</sup> matrix (thereby filling in the extremely sparse areas of the Hi-C<sup>2</sup> matrix). This summed matrix was then corrected with the KR matrix balancing algorithm. The resulting normalization factors were used as correction factors for the Hi-C<sup>2</sup> data.

*b. KR gap-filling:* The KR gap-filling normalization was performed similarly to the method described above, but to avoid corrected Hi-C biases and Hi-C<sup>2</sup> biases together, the method above was performed on KR normalized data. Specifically, the KR correction factors derived from the genome-wide Hap1 wild-type Hi-C map were used to perform an initial correction of the Hi-C<sup>2</sup> data. After the initial correction, the average intrachromosomal coverage of the loci within the target region (defined as the entire interval tiled by probes not specifically the loci that were covered by a probe) was calculated from the Hi-C<sup>2</sup> matrix. Similarly, the average intrachromosomal coverage of all loci was calculated from the corrected genome-wide Hap1 wild-type Hi-C map. A matrix consisting of all entries corresponding to two loci that were both outside the target region was constructed from the raw uncorrected genome-wide Hap1 Hi-C map. This matrix was multiplied by the ratio of the average coverage of loci within the target region in the Hi-C<sup>2</sup> data to the average coverage of all loci from the genome-wide Hap1 wild-type Hi-C data and then summed with the Hi-C<sup>2</sup> matrix (thereby filling in the extremely sparse areas of the Hi-C<sup>2</sup> matrix). This summed matrix was then corrected with the KR matrix balancing algorithm. The resulting normalization factors were used as correction factors for the Hi-C<sup>2</sup> data.

*c. Raw gap-filling with rescaling:* Filling in the sparse areas of the Hi-C<sup>2</sup> matrix corrects for first order target enrichment biases from hybrid capture to some extent, but does not account for the fact that differential enrichments may be present for entries of the matrix corresponding to one on-target loci and one off-target loci vs. entries corresponding to two on-target loci. To address this, before performing gap-filling as in the above methods, we first calculated for each locus in the target region, the ratio of the number of contacts formed between the locus and off-target loci to the number of contacts formed between the locus and other on-target loci using the genome-wide Hap1 wild-type Hi-C data. We then calculated the same ratio using the Hi-C<sup>2</sup> data. The ratio of these ratios provided a scaling factor for each on-target locus which we used to scale all entries in the Hi-C<sup>2</sup> matrix corresponding to contacts between the on-target locus and off-target loci. After performing this correction, we followed the method from method a, i.e. a matrix consisting of all entries corresponding to two loci that were both outside the target region was con-

structed from the raw uncorrected genome-wide Hap1 Hi-C map. This matrix was multiplied by the ratio of the average coverage of loci within the target region in the Hi-C<sup>2</sup> data (using the rescaled Hi-C<sup>2</sup> data) to the average coverage of all loci from the genome-wide Hap1 wild-type Hi-C data and then summed with the Hi-C<sup>2</sup> matrix (thereby filling in the extremely sparse areas of the Hi-C<sup>2</sup> matrix). This summed matrix was then corrected with the KR matrix balancing algorithm. The resulting normalization factors were used as correction factors for the Hi-C<sup>2</sup> data.

*d. KR gap-filling with rescaling:* This method is the same as method c., except that as in method b., the Hi-C<sup>2</sup> data was initially corrected with the KR factors derived from the Hap1 genome-wide wild-type Hi-C matrix and the KR corrected wild-type Hi-C data was used for gap-filling.

*e. Raw gap-filling with rescaling and thresholding:* We noticed that for a few very sparse (under-covered) rows in the Hi-C<sup>2</sup> data, our normalization methods would actually over-correct, leading to highly-covered streak artifacts in the data. In order to remove these artifacts, we added a final filtering step, where loci with a normalization factor ( $C$ ) of less than 0.33 (where  $M_{i,j}$  is divided by  $C_i$  and  $C_j$  to get the corrected entry  $M_{i,j}^*$ ) were thresholded so that their normalization factors were raised to 0.33 (this was implemented after the KR matrix balancing was run, not as a constraint during the running of the algorithm). The threshold of 0.33 was chosen based on empirical observation of rows that led to streaky artifacts. This method is the same as method c. except with the aforementioned thresholding.

*f. KR gap-filling with rescaling and thresholding:* This method is the same as method d. except with the addition of the thresholding described in method e.

Method e. was used for all Hi-C<sup>2</sup> data described in the main text and shown in the main figures of this study. (It was chosen because it makes no assumptions about underlying biases in the data except for the assumption that biases for loci that were not targeted for perturbation or for hybrid selection have identical biases to those present in the wild-type Hi-C data.)

## II. Computational analysis of Hi-C maps

### a. Measurements of chromatin flexibility

#### i. Cyclization probability measurements

At the smallest scale, models of chromatin structure rely on an estimate of the Kuhn length of a chromatin fiber (S12). Polymer theory predicts that higher order structures can only form at scales an order of magnitude larger than the Kuhn length. Because direct estimates of chromatin flexibility *in vivo* have not previously been available, inferences about the Kuhn length of chromatin have been based on theoretical, computational, and *in vitro* models (2, 15, 22, S13, S14).

If  $L_K$  is the Kuhn length of nuclear chromatin, measured in base pairs, single fragments of chromatin of length  $L$  will form few cycles when  $L < L_K$  and many cycles when  $L > L_K$ . To empirically measure  $L_K$ , we filtered for Hi-C contacts formed by the two ends of a single chromatin fragment. We employed two criteria. First, for each restriction enzyme, we examined only contacts occurring between two ends of a single restriction fragment, assuming full cutting of the enzyme. Second, depending on the forward or reverse orientation of the alignment of each read end to the template, four “contact orientations” are possible. Contacts occurring between two ends of

a single fragment are necessarily “outer” contacts, characterized by reverse alignment of the upstream read and forward alignment of the downstream read. At small distances, outer contacts predominantly correspond to single fragments. Thus, we further restricted our analysis to outer contacts.

Cyclization probability at length  $L$  was computed as the number of single-fragment outer contacts of length  $L$  divided by the total number of restriction fragments of length  $L$ , binned logarithmically. Because contact maps are aggregated over samples from many cells, cyclization probability is a relative measure. Thus, we normalized to a probability distribution. Cyclization probability was computed on five Hi-C maps: two maps using restriction enzymes HindIII and NcoI, which recognize a six-basepair sequence and have cutting sites on average every 3.6kb; two maps using restriction enzymes MboI and DpnII, which recognize a four-basepair sequence and have cutting sites on average every 420bp; and one “native” map using MboI and no cross-linking preparation (8) (Fig 1B, Fig S1B)

## ii. Cyclization probability is consistent across compartments

We also computed cyclization probability with single-fragment outer contacts grouped by each of the five subcompartments as identified in (8). Cyclization counts and restriction fragment lengths were compared against subcompartment boundaries and partitioned. Fragments that spanned more than one subcompartment were discarded; fewer than 0.1% of fragments were discarded in this manner. Cyclization probability was computed as described above, summing over only cyclization counts and restriction fragment lengths within each subcompartment. Plots of cyclization probability as function of fragment length were extremely consistent across all five subcompartments (Fig S1A).

In order to search for variation in local flexibility, we additionally examined cyclization probability of the MboI experiment in 1Mb windows across the genome. We consistently observed a steep rise in probability for distances less than 1kb and a flattening at distances larger than 1kb, consistent with genome-wide and compartment-wide averages. We noticed some variability in cyclization probability at distances larger than 1kb ? the probability in some regions showed slight increase as a function of distance while the probability in many regions remained flat for large distances, perhaps reflecting local variability. However, this analysis significantly noisier since few cycles are formed at large distances within each individual window.

## iii. Contact probability decays at distances greater than 5kb

Genome-wide contact probability was computed (as described in Section II.b.i) on the primary GM12878 Hi-C map (Fig S2A). The contact probability decay is reliable at distances larger than the typical restriction fragment, which is around 2kb for maps using the MboI restriction enzyme (due to cutting inefficiency). We observe a contact probability decay at distances larger than 5kb, suggesting that  $L_K < 5\text{kb}$ .

## iv. Cyclization probability data are inconsistent with the 30-nm fiber

The persistence length is the length of a polymer at which the tangent vectors at the two ends of the polymer become uncorrelated. For a worm-like chain, the Kuhn length is twice the persistence length. Coarse-grain computer simulations of the 30-nm fiber have estimated its persistence length to be between 120nm and 265nm across a range of parameters (15, S15-17). At a linear fiber density of 6 or 7 nucleosomes per

11nm, 200bp per nucleosome, this is equivalent to a persistence length between 15kb and 30kb, suggesting a Kuhn length between 30kb and 60kb.

The 30-nm fiber is significantly less flexible than a 10-nm fiber or a 10-nm fiber compacted into a polymer melt. Because the 30-nm fiber is characterized by a helical structure with six nucleosomes, or roughly 1.2kb, per turn, it is only flexible at length scales an order of magnitude larger, and is clearly inconsistent with our measurements of chromatin flexibility. More generally, our data are inconsistent with any repeating helical structure since cyclization probability is flat at distances larger than 1kb whereas repeating structures should show characteristic spikes at regular intervals. A view of chromatin as a melt of 10-nm fibers is consistent with many recent studies (29, 30, S18-20).

## v. Experimental ionic conditions are comparable to physiological conditions

Ionic concentrations are known to affect fiber flexibility, with high concentration causing greater fiber compaction and decreased flexibility. *In situ* Hi-C experiments are conducted at high salt concentrations (10mM NaCl + 10mM MgCl<sub>2</sub>) comparable to physiological conditions and simulations of 30-nm fibers described above.

## b. Measurements of local contact probability

### i. Definition of contact probability

The contact probability of two points separated by linear distance  $s$  was computed as the ratio  $I(s) = I_{actual}(s)/I_{possible}(s)$ . The numerator  $I_{actual}(s)$  is computed as the number of contacts observed occurring at distance  $s$ . The denominator  $I_{possible}(s)$  is computed as the possible number of contacts occurring at distance  $s$ ; for a chain of length  $N$ ,  $I_{possible}(s) = N - s - 1$ . All contact probability plots are displayed on log-log axes with distance  $s$  binned logarithmically.

Contact probability may be computed across the whole genome or within a specific window. For genome-wide chromatin contact probability,  $I_{actual}(s)$  and  $I_{possible}(s)$  were each aggregated over all chromosomes. For contact probability within a specified window,  $I_{actual}(s)$  and  $I_{possible}(s)$  were computed as the number of actual Hi-C contacts and possible contacts at distance  $s$  with at least one end in the chosen region.

Contact probability often exhibited a power law  $I(s) \sim s^{-\gamma}$ , or “contact probability scaling”, within a range of values of  $s$ . We measured  $\gamma$  as the slope of the best-fit line on  $I(s)$ , when plotted on log-log axes, within a chosen range of distances.

### ii. Local contact probability scalings are highly reproducible

Local contact probability scaling exponents were highly reproducible across biological replicates. We partitioned chromosome 1 into 4,517 50kb windows and measured  $\gamma$  for three different distance regimes (10-100kb, 10-350kb, 10-1000kb) in each window and on each of the primary and replicate GM12878 Hi-C maps. Values of  $\gamma$  obtained from the primary and replicate maps were highly correlated in each regime (Pearson coefficients 0.93, 0.97, 0.98 respectively, Fig S2E).

### iii. Contact probability within domains exhibits a power law with $\gamma \approx 0.75$

To measure  $\gamma$  within contact domains, we computed contact probability in a 50kb window at the center of each domain (Fig 2A). To obtain reliable measurements of intra-domain behavior, domains containing other domains in their interiors were excluded. For the GM12878 map, all such domains of size 200kb or larger were used; for all other cell types, all domains

of size 300kb or larger were used. Contact probability measured in this manner for all domains in the GM12878 map with sizes 200-220kb, 500-600kb, and 900-1200kb are plotted in Figure 2C.

For each domain of size  $L$ , we measured the contact probability exponent  $\gamma$  between distances of 10kb and  $L/2-50\text{kb}-20\text{kb}$ . All contacts in this distance range are necessarily intra-domain and 20kb from the domain boundary, avoiding boundary effects. Distributions of  $\gamma$  were consistent across domains of different sizes (Fig 2D), as well as across 6 additional cell types (Fig 2E, Table S1).

As an additional measurement of  $\gamma$ , we computed aggregated intra-domain contact probability, taking all contact pairs with both ends inside a single domain. All domains larger than 100kb that did not contain sub-domains were included, for a total of 5,265 domains. The intra-domain contact probability exhibited a clear scaling with  $\gamma = 0.76$  between 10kb and 1Mb (Figure 2B). Notably, by using only intra-domain contacts in this aggregate measure, the scaling extended to distances larger than in genome-wide aggregate measurements.

#### iv. Directional contact probability exhibits similar values of $\gamma$

To assess whether local contact probability exponents varied substantially within domain, we compared exponents on different windows within single domains. Specifically, for a domain with left and right endpoints  $A$  and  $B$ , we picked two consecutive 50kb windows  $R_1 = [(A+B)/2 - 50\text{kb}, (A+B)/2]$  and  $R_2 = [(A+B)/2, (A+B)/2 + 50\text{kb}]$  flanking the domain center. On  $R_1$  we computed the “leftward” contact probability, counting only actual and possible contacts  $(s_1, s_2)$  such that  $s_1 < s_2$  and  $s_2$  lies in  $R_1$ , and measured the intra-domain scaling exponent  $\gamma_1$ . Analogously, on  $R_2$  we computed the “rightward” contact probability, counting only actual and possible contacts  $(s_1, s_2)$  such that  $s_1 < s_2$  and  $s_1$  lies in  $R_2$ , and measured the intra-domain scaling exponent  $\gamma_2$ . In this manner, the two measurements contained no common contacts. We found that  $\gamma_1$  and  $\gamma_2$  were uncorrelated and the distributions of each were similar to distributions of our original measurements of  $\gamma$  through the domain center (Fig S2F).

#### v. Values of $\gamma$ are consistent across compartments

To assess the variability of  $\gamma$  between nuclear subcompartments, we computed  $\gamma$  for each of 1,730 domains that were more than 80% contained in a single subcompartment. We examined the five subcompartments as identified in (8) (excluding B4 which occupies a very small proportion of the genome). Contact probability scalings were extremely consistent across all subcompartments (Fig S2C), including both active compartments A1 (mean  $\gamma = 0.743$ ) and A2 (mean  $\gamma = 0.725$ ), as well as all three inactive compartments B1 (mean  $\gamma = 0.746$ ), B2 (mean  $\gamma = 0.768$ ), and B3 (mean  $\gamma = 0.774$ ).

While values of  $\gamma$  were consistent between nuclear subcompartments, we note that domains in different nuclear subcompartments display different size distributions. Domains in A type compartments tend to be smaller (A1 median=140kb, mean = 190kb; A2 median=145kb, mean=200kb) than domains in B type compartments (B1 median=200kb, mean=265kb; B2 median=330kb, mean=425kb; B3 median=280kb, mean=360kb).

#### vi. Aggregate measures of contact probability consistently overestimate $\gamma$

We found that the existence of domains skews the value of  $\gamma$  when it is measured on aggregate contact probability over distances of several hundred kilobases to several megabases. Specifically, because contacts are enhanced between two loci in the same domain and depleted between loci in different do-

main, windows with many domains exhibit a steeper drop-off in contacts. To demonstrate this, we partitioned the genome into 567 windows of length 5Mb and measured the contact probability scaling at distances of 300Kb to 3Mb. When we plotted the values of  $\gamma$  obtained against the number of domains intersecting the window, a clear dependence emerged, where regions with many small domains exhibited larger values of  $\gamma$  (Fig S2B).

### c. Fractal models are inconsistent with intra-domain contact probability

Interpreting the contact probability exponent  $\gamma$  requires a full understanding of which values of  $\gamma$  may be achieved by which structures. The  $\gamma$  value of the fractal globule can be studied in terms of mathematical fractal curves, which are scale-free and densely packed, like the fractal globule. Because they are computationally tractable, they are often used to approximate the fractal globule (S21). Approximate numerical studies of fractal curves have suggested that the fractal globule can exhibit values of  $\gamma$  ranging from 1 to 1.33 (5, 17). However, no rigorous bounds have been derived.

Here we prove mathematically that any fractal (regular, scale-free) structure must have  $\gamma$  between 1 and 2. These results are illustrated in Figure 3B and are derived in full mathematical rigor in Section IV. Notably, contact domains have exponent  $\gamma \approx 0.75$ , inconsistent with the fractal globule model.

Domain contact probability in Figure 3B was measured in a 50kb window through the domain center, as in Figure 2B. Each trace in Figure 3B was renormalized to allow direct comparison of contact probability for Hi-C domains and fractal curves. Linear distances (x-direction) were normalized to place the start and end of the scaling regime at the left and right boundaries of the plot: contact domain scalings ran from 10kb to half the domain size; fractal curve and fractal globule scalings ran through the whole length with one point excluded at each end to avoid boundary effects. Contact probabilities (y-direction) were renormalized so that all traces pass through a single point in the upper left.

### d. Analysis of chromatin loop networks

#### i. Hubs are detected as (nearly) isolated cliques in the loop network

Chromatin hubs, collections of loci that simultaneously colocalize in the nucleus, are thought to play a crucial role in gene regulation and chromatin packaging. Chromatin hubs manifest clearly in Hi-C contact maps as collections of loci with loops forming between all pairs of loci (8).

We identified hundreds of chromatin hubs in GM12878 by converting Hi-C loop calls (as annotated by HiCCUPS (8)) into a “loop network” where each node in the network corresponds to a genomic locus and each edge in the network corresponds to a chromatin loop. Due to variability in HiCCUPS, which is performed at 5kb and 10kb resolution, we grouped any two loop anchors within 20kb into a single locus with a single corresponding node in the network. An edge is drawn between two loci if there exists a Hi-C loop between a loop anchor in each of the loci. Hubs are then detected in the network as isolated cliques.

#### ii. An extended list of loops accounts for false negative loops

The loops reported in (8) use conservative parameters to avoid false positive loops, and therefore may have some missing false negative loops. However, failing to identify any one of  $N(N-1)/2$  loops will prevent a hub of size  $N$  from being identified. Thus, we allow for a margin when detecting hubs of size



4 or larger. Specifically, for a hub of size  $N \geq 4$ , we allowed up to  $N - 2$  to be called from an extended list of chromatin loops. This extended list was detected from the GM12878 Hi-C map using HiCCUPS (8) with much more relaxed thresholds. (Specifically, the allowed false discovery rate (FDR) in the Benjamini-Hochberg FDR control procedure was increased from 10% to 50% and thresholds for the lower left, vertical, and horizontal filters were reduced to 1. Loop calls from 5kb, 10kb, and 25kb resolution were combined.) Significantly decreasing threshold stringency would typically confound analysis by increasing the number of false positives; however, this effect is dramatically mitigated here since any loop in the extended list that is not formed between genomic loci in the original list may be discarded. In this way, the number of allowed loops is increased from 9,273 to 13,295, significantly reducing the false negative rate of the loop list.

Using this approach, we detected 69 isolated cliques of size 3, 16 cliques of size 4, and 1 clique of size 5. We found that allowing for a small number of loops ( $\leq N - 2$ ) between loci inside the clique and loci outside the clique allowed us to call more hubs without lowering quality. By doing so, we identified 145 cliques of size three, 86 cliques of size four, 5 cliques of size five, and 1 clique of size 6.

### iii. Hubs often involve a series of consecutive loops

The detected hubs were often formed between consecutive loop anchors. Of the 237 detected hubs, 152 of them involved only consecutive loop anchors; i.e. all loop anchor loci between the first and last loop anchor of the hub belong to the hub itself.

### iv. Hubs are consistent with looping between pairs of convergent CTCF motifs

Our previous study demonstrated that loops typically lie between convergently-oriented DNA motifs that bind a complex containing CTCF and cohesin (8). We find that the detected hubs are strongly consistent with this property. A list of the most probable CTCF binding sites was assembled by identifying the best match to the consensus CTCF binding motif (S5) within each peak in the ENCODE CTCF ChIP-Seq data from GM12878 and the orientation each site was determined by whether the binding motif was on the forward or reverse strand (8). We then matched each hub locus with any CTCF binding site that was within 15kb of any loop anchor in the locus. The first hub locus, which forms several downstream loops, was associated with a forward-oriented motif in 231 of 237 hubs. The last hub locus, which forms several upstream loops, was associated with a reverse-oriented motif in 232 of 237 hubs.

### v. Middle loci of hubs show strong enrichment for pairs of divergent CTCF motifs

Of the 336 middle hub loci, 235 were associated with motifs of both orientations. When we examined middle loci that were associated with exactly one motif of each orientation, 59 of the pairs were in the divergent configuration (a reverse motif followed by a forward motif) while only 7 of the pairs were in the convergent configuration (89.4% versus 10.6%). We observed an even stronger effect when we generalized this measurement to middle loci with more than two motifs. In this analysis, a set of CTCF motifs at middle hub loci was counted as divergent when it contained one or more reverse motifs followed by one or more forward motifs. Similarly, a set of CTCF motifs at middle hub loci was counted as convergent when it contained one or more forward motifs followed by one or more reverse motifs. We found that 145 middle hub loci

were associated with a divergent arrangement of CTCF motifs while only 12 were associated with a convergent arrangement of CTCF motifs (92.4% versus 7.6%).

### vi. All observed effects are highly enriched over suitable null models

Hubs detected from the Hi-C loop list were significantly enriched relative to a randomly shuffled control. From the loop network and the extended loop network, we computed the distribution of loops  $L(d)$  as a function of genomic distance  $d$ . From a given loop network, a shuffled network was generated with number of nodes and edges equal to the original network, but with randomly chosen edges. The probability of drawing edge  $(a, b)$  was proportional to  $\text{deg}(a) \cdot \text{deg}(b) \cdot L(|a-b|)$ . In this manner, we computed 10,000 shuffled networks of the original loop list. In addition, we computed 10,000 corresponding extended networks by shuffling the extended loop list and adding the appropriate number of new edges.

On each of 10,000 randomly shuffled networks with corresponding extended networks, we ran our hub detection algorithm. When cliques were required to be perfectly isolated, we detected an average of only 10.8 hubs of size three, 0.571 hubs of size four, and 0.008 hubs of size five. When cliques were allowed  $N-2$  outside loops, we detected an average of only 42.5 hubs of size three, 6.95 hubs of size four, 0.362 hubs of size five, and 0.024 hubs of size six.

Enrichment of CTCF binding orientations was computed relative to the null model of a randomly chosen locus on the genome. That is, the percentage of hub loci within 15kb of a forward CTCF motif, a reverse CTCF motif, or CTCF motifs in both orientations was compared with the percentage of the same observations occurring for a randomly chosen locus in the genome.

### vii. An “exclusion domain” often forms between two loci that loop to a common third locus

We observed in our genome editing experiments that deletion of the first or last locus (A or C) in a 3-clique (A, B, C) disrupted both the corresponding loops and the contact domains. However, deletion of one of the two anchor motifs at the middle locus (B) disrupted the corresponding loop but did not eliminate the domain spanned by the loop. This behavior is predicted by the extrusion simulations: for example, existence of the B-C loop excluded extrusion complexes between A and B from passing B. We dubbed this configuration an “exclusion domain”.

Upon closer examination, we observed exclusion domains throughout the wild type genome. We examined pairs of loops (A, B) and (C, D) such that either the upstream loop anchors (A and C) or the downstream loop anchors (B and D) coincide (within 20kb). Assume for clarity that loci A and C coincide and B lies upstream of D; other situations are analogous. We filtered out cases that overlap with a compartment boundary (specifically, we require no compartment flip to occur between  $\min(A, C) - 20\text{kb}$  and  $D + 20\text{kb}$ ) in order to rule out the influence of compartments on domain formation.

We then examined the frequency of overlap of each of the three regions A-B, A-D, and B-D with the list of contact domains reported in (8); overlap was defined by a distance of  $\min(50\text{kb}, 0.2 \times \text{domain size})$ . These frequencies were compared with a control in which contact domains were reshuffled in the chromosome, averaged over 100 replicates. Since loops are formed between A-D and A-B, we observed domains in about 40% of cases, consistent with previous observations of loop domain formation. Specifically, in 986 cases, we observed 399 domains (40.5%) between A-B, a 14.4-fold enrichment, and 404 domains (41.0%) between A-D, a 12.4-fold enrich-

ment. Notably, we observed significant enrichment of contact domains formed between B-D despite the lack of a loop: a total of 158 cases (16.0%) or a 6.3-fold enrichment. Because there is no loop between B-D but B and D each loop to the same distal locus, these are exclusion domains.

To ensure that the detection of exclusion domains was not driven by false positive loops, we repeated the analysis and filtered out all cases in which a loop formed between B-D (within a 30kb threshold) in an expanded list of loops containing 99% more loops. These loops were detected in GM12878 using HiC-CUPS (8) but with relaxed thresholds (FDR rate of 10% and lower left, vertical, and horizontal thresholds of 1.3, 1.4, and 1.5). Enrichment of exclusion domains remained: out of 818 cases we observed 99 exclusion domains (12.1%), a 4.7-fold enrichment. In this case, we observed 333 (40.7%) domains at A-B (14.5-fold) and 329 (40.2%) domains at A-D (12.4-fold).

We also repeated the analysis and filtered for loops associated with CTCF motifs oriented appropriately for the exclusion effect. Specifically, when X and Y looped downstream to Z we required that X and Y were associated with (within a 20kb window of) forward CTCF motifs and Z was associated with a reverse CTCF motif; when X and Y looped upstream to Z we required that X and Y were associated with reverse CTCF motifs and Z was associated with a forward CTCF motif. Enrichment was similar. When false negative loops were simultaneously filtered, in 444 cases we observed 59 (13.3%) exclusion domains (5.1-fold enrichment), 189 (42.6%) domains between A-B (14.9-fold), and 190 (42.8%) domains between A-D (13.2-fold).

### III. Polymer simulations

It has been known for decades that the higher-order folded structure of chromatin plays an important role in the biological function of the cell, particularly through partitioning into chromatin domains (S22) and loops (4, S23). However, the exact physical nature of this folding has been difficult to characterize because the principles governing this higher-order organization were entirely unclear. Possible mechanisms underlying chromatin compaction have included looping on a backbone (9, S24), looping through diffusion (S25, S26), compaction through confinement (5, 10), and supercoiling (S27). Other approaches use chromatin contact maps to define a population of physical models but do not reveal biological principles underlying the 3D organization (S28, S29). However, these models are appropriate only at scales larger than chromatin domains. Currently, no convincing models exist for chromatin at the scale of domains. Previous models have been limited by inexact experimental measurements of the folded state, typically measurements of distance distributions using 3D-FISH or coarse Hi-C maps.

Using our new kilobase-resolution Hi-C maps, we are able to comprehensively examine the folding within contact domains genome wide. Here we show using molecular dynamics simulations that the tension globule and the extrusion model are consistent with the folding of chromatin within these domains.

#### a. Molecular dynamics simulations

##### i. Polymer properties

Coarse-grained molecular dynamics simulations were used to investigate the properties of collapsing polymers. Chains of identical monomers were simulated under Brownian-like con-

ditions using Langevin dynamics. Monomers were taken to have mass  $m = 1$  and radius  $\sigma = 1$ . Each monomer represents 1kb of DNA. Polymers up to 10Mb (10,000 monomers) were simulated.

Successive monomers in the chain were held together by stiff harmonic bonds described by  $U_{bond}(r) = (k_{bond}/2) \cdot (r - r_0)^2$  with resting length  $r_0 = 1/\sqrt{2}$  (distance units) and  $k_{bond} = 1000$  (energy units). All other pairs of atoms interact using pairwise forces, denoted by  $U_{pair}(r)$ , whose details depend upon the type of simulation being run (see below). Monomer volume exclusion was implemented by a repulsive Lennard-Jones potential with  $\epsilon_{LJ} = 1$  (energy units) and  $\sigma = 1$  (distance units).

No 3-body or 4-body bond-angle or torsion-angle forces were used. Due to repulsive interactions between the first and third of three consecutive monomers, angle between consecutive bonds was typically 90 degrees or larger.

Polymers were initialized as a random walk with step size  $L_0 = 3 \cdot r_0$  and then statically minimized (with velocity zeroed at each step) to relax to regular bond lengths  $r_0$ . This resulted in more extended random initial states. Changing the expansion factor had negligible effect on the properties of the final collapsed states (Fig S9C).

##### ii. Simulation dynamics

The equations of motion were integrated using Langevin dynamics with a time step of 0.005 in units of  $\tau_m$ , where  $\tau_m = \sqrt{m\sigma^2/\epsilon}$ . Parameters such as the temperature  $T$  (in units of  $\epsilon/k_B$ ) and the damping coefficient,  $\zeta = 1/t_{damp}$  ( $t_{damp}$  measures the time over which momentum decays by a factor of 2, in units of  $\tau_m$ ) were varied to explore a wide variety of behavior. The number of time steps was chosen to ensure full collapse, and compactness of the final states was verified by measuring monomer density as a function of distance from the center of mass. All simulations were run using LAMMPS (23). Images of polymer collapse were rendered in Visual Molecular Dynamics (S30).

##### iii. Simulations of tension globules

In tension globule simulations and extrusion model simulations, all pairs of atoms experienced an attractive short-range force described by the Lennard-Jones 6-12 potential

$$U_{pair}(r) = 4\epsilon_{LJ}((\sigma/r)^{12} - (\sigma/r)^6)$$

with  $\epsilon_{LJ} = 1$  and  $\sigma = 2^{-1/6}$  so that  $U_{pair}(r)$  is minimized at  $r = 1$  and cutoff distance of  $r_{cut} = 2.5$  (distance units). This mimics the effect of immersing the polymer in a poor solvent (21, S31-32).

Tension globule simulations were characterized by moderate temperature and over-damping; i.e. an environment in which momentum does not significantly accumulate. The tension globules shown in Figure 4B-C were simulated with  $N = 10000$  monomers, temperature  $T = 1$ , and damping coefficient,  $\zeta = 1/t_{damp}$  with  $t_{damp} = 35$  for 510,000 time steps (Sim #1 in Table S4).

We also simulated tension globules with pairwise monomer interactions modeled by a Yukawa potential instead of Lennard-Jones (Fig S10, Table S4C), a model of screened electrostatic interactions, similar to observed inter-nucleosomal forces (S33-36). The classic form of the Yukawa potential has energy proportional to  $e^{-mr}/r$ , where screening constant  $m$  determines how quickly the force decays. To interpolate between repulsive Lennard-Jones forces for  $r < \sigma$  and Yukawa

forces for  $r > \sigma$  we used the form

$$U_{pair}(r) = \begin{cases} \epsilon \left( \frac{b}{a-b} \left( \frac{\sigma}{r} \right)^a - \frac{a}{a-b} \left( \frac{\sigma}{r} \right)^b \right) & r < \sigma \\ \beta \epsilon \left( \frac{b}{a-b} \left( \frac{\sigma}{r} \right)^a - \alpha \frac{a}{a-b} \left( \frac{\sigma}{r} \right)^b \right) e^{-m(r-\sigma)} & r \geq \sigma \end{cases}$$

where  $a = 12$ ,  $b = 1$ , and  $\beta$  and  $\alpha$  are chosen to match the boundary condition at  $r = \sigma$ , namely,  $\beta = (a - b)/(\alpha a - b)$  and  $\alpha = 1/(1 + m\sigma/b)$ .

#### iv. Simulations of fractal globules

Fractal globules were generated using molecular dynamics simulations by crushing a random polymer with global forces. In addition to repulsive Lennard-Jones, an external harmonic force was added to pull each monomer inward toward the origin  $U_{ext}(r) = (k_{ext}/2) \cdot r^2$ . These forces do not depend on the relative position between atoms, only their position relative to the origin. This is mathematically equivalent to adding a long-range attractive quadratic term  $(k_{ext}/4N) \cdot r^2$  between all pairs of monomers. This compressive force mimics the effects of crowding experienced by chromosomes confined within the space of the cell nucleus. Simulations driven predominantly by external forces exhibited qualitatively different collapses as well as values of  $\gamma$  near 1.0 (Fig 4A, Fig S10).

#### v. Simulations of tension globule loop domains

Tension globule simulations incorporating loops used Lennard-Jones potential with parameters identical to simulation #1 in Table S4. A harmonic bond with strength  $k_{loop} = 1000$  and resting length  $r_0 = 1$  was introduced between several select pairs of monomers to form a loop at the beginning of simulation. In addition, a harmonic bond with strength  $k_{tether} = 50$  and resting length  $r_{tether}$  (variable depending on polymer length, ranging from 50 to 300) was introduced between the first and last monomers in order to tether the start and end of the polymer apart. After the initial static minimization step, an additional equilibration step was run for 500,000 timesteps, incorporating only repulsive Lennard-Jones forces and temperature  $T = 1$ , to relax the looping contour into a natural state. Afterwards, standard tension globule collapse was simulated. Looping monomers for the simulations displayed in Figure 4D were chosen to match the positions of loops observed in Hi-C data. Simulations were run on a 3Mb polymer with  $r_{tether} = 100$ , and the contact map was computed by aggregating over 530 globules.

#### vi. Simulations of loop extrusion

In the extrusion model, an extrusion complex with two binding domains binds to two locations on the chromosome, and each domain walks in opposite directions along the chromatin fiber, pulling pairs of distal loci into close proximity. In simulation, we represent the extrusion complex by a harmonic bond with coefficient  $k_{bond} = 10$  and length 1.0. The extrusion complex is initially bound to two consecutive monomers and sliding outwards every  $T_0$  timesteps; i.e. the bond shifts from monomers  $(a, b)$  to monomers  $(a - 1, b + 1)$ . The specific value of  $T_0$  does not have a substantial impact on the final result and is typically taken to be 200 or 500 timesteps. The sliding dynamics may be made stochastic by assuming a probability  $p$  of stepping outwards, a probability  $q$  of stepping inwards, and a probability  $1 - p - q$  of remaining in place, and the results will be essentially the same as long as  $p$  is substantially larger than  $q$  to drive the overall movement outwards. Similarly, the leftward and rightward movements may be decoupled with negligible effect on outcome. For simplicity,

we assume the extrusion complex takes regular, equally sized steps outwards.

Extrusion complexes may interact with oriented CTCF motifs, represented as special monomers that cause the extrusion complex to halt and fix in position with some probability. These motifs are oriented: the downstream binding domain may be bind to and halt at a reverse-oriented motif with some probability but will be unaffected by a forward-oriented motif, while the upstream binding domain may be bind to and halt at a forward-oriented motif with some probability but will be unaffected by a reverse-oriented motif. As input to the extrusion simulation, a list of two binding strengths for each monomer (one for each orientation) is required; almost all the values will be 0. As we show in Section III.b.i, probabilities can be calculated in a simple, principled manner from CTCF ChIP-seq data of a particular region of the genome, and the resulting simulations recapitulate the contact map of that region very well.

The extrusion complexes are bound to the polymer at a density that depends on their concentration. Our extrusion simulations typically contained 2,000 to 3,000 monomers and 8 to 15 extrusion complexes. Extrusion complexes cannot pass each other; if two binding domains of two different extrusion complexes are adjacent on the polymer, one of the colliding complexes dissociates. A mobile complex may collide with a halted complex and dissociate, but a halted complex cannot dissociate in this manner (Fig S12C). In addition to dissociation due to collisions, the extrusion complexes can be made to dissociate at a fixed rate that depends on their processivity. At every extrusion step, each complex, including halted ones, has a halted probability  $P_{dissociate}$  of randomly falling off. All simulations shown here have  $P_{dissociate} = 0$ , but allowing small values of  $P_{dissociate}$  (e.g.  $< 0.002$ , or processivity  $> 500$  steps) will not change results significantly. Simulations are run for a large number of extrusion steps (typically 4,000) and thus represent a steady state of extrusion dynamics.

Most extrusion simulation presented use similar conditions as the tension globule, with inter-monomeric attractive forces modeled by the Lennard-Jones potential, high viscosity, and moderate temperature. Results are robust to changes in the physics of the system (Fig S12A).

## b. Simulated CTCF binding locations

### i. Assigning extrusion complex binding strengths from CTCF ChIP-seq tracks

In order to model the 3D structure of a region in GM12878 using extrusion in a simple, principled way, we used the ENCODE CTCF ChIP-Seq data (S37) from GM12878 (tracks from the Broad Institute or Stanford University) to directly define the oriented binding strengths. First, a genomic region of length  $N$  kilobases was chosen to be modeled by a simulated polymer with length  $N$ , and the CTCF ChIP-seq signal  $s$  (binned at 1kb) was converted into a binding strength; i.e. a probability of binding defined by  $P = 1 - \lambda/(s - s^*)$  for  $s > s^*$  and  $P = 0$  otherwise, where  $s^*$  is the median ChIP-seq signal in the region and  $\lambda$  is a normalization constant. Since ChIP-seq signal is variable between regions and the absolute value of the signal is not directly interpretable as a binding strength, the normalization constant  $\lambda$  is chosen to yield binding strengths in an appropriate range. Low values of  $\lambda$  cause extrusion to halt at a large number of weak ChIP-seq peaks, preventing proper extrusion coverage, while high values of  $\lambda$  causes extrusion to occur irrespective of ChIP-seq-defined boundaries, preventing the formation of distinct loops and domains. Second, a list of the most probable CTCF binding sites was assembled by identifying the best match to the

consensus CTCF binding motif (S5) within each peak in the CTCF ChIP-seq track, and the orientation of each site was determined by whether the binding motif was on the forward or reverse strand. Each non-zero halting probability was then oriented according to the orientation of the nearest CTCF binding site within 5kb.

## ii. Assigning tension globule loops from CTCF ChIP-seq tracks

We also explored automatically assigning loops for tension globule simulations based on CTCF ChIP-seq signals. Oriented binding probabilities were computed as described above. A loop was formed between the two loci  $A$  and  $B$  (with  $A < B$ ) proportional to the forward probability of  $A$  times the reverse probability of  $B$  times the probability  $A$  did not bind to any other locus between  $A$  and  $B$ . In simulation, 10 loops were chosen according to this distribution and the endpoints of the polymer were tethered 150 units apart (Fig S11E).

## c. Analysis of the tension globule

### i. Tension globule contact probability matches experimental observations

For each globule, two monomers were said to be in contact if they were separated by less than  $\rho = 1.5$  (distance units). With this definition, we generated contact maps (Fig S8B) and computed contact probability (as described above) aggregated over many replicates of the same simulation. Figure 4C shows contact probability of 450 individual tension globules. While changing the value of  $\rho$  affected the total number of contacts measured per globule, it did not significantly affect the contact probability scaling exponent (Fig S9).

### ii. Contact probability scalings are robust to changes in simulation parameters

We performed numerous additional simulations, each with at least 100 replicates, to verify that our observations were robust to changes in simulation parameters. Changes to the damping strength, temperature, initial extent, polymer length, and simulation time had no significant effect on  $\gamma$  (Fig S9, Table S4). Qualitatively, simulations with temperature  $T < 0.7$  not collapse fully, settling into an extended “stringy” state, and globules with  $T \gg 2.0$  retained too much thermal energy to fully compact. After polymers were fully collapsed into a globular state, running the simulation for additional time did not significantly affect the value of  $\gamma$ .

Tension globule collapse due to Yukawa forces was qualitatively similar, displaying sub-globule formation and tension-driven linear compaction (Fig S10). Because the attractive forces decay less quickly with distance, the tension forces are stronger and values of  $\gamma$  ranged between 0.7 and 0.6. Exact value of  $\gamma$  as well as the distance range of the scaling depended on the screening strength parameter  $m$ . (Fig S10, Table S4).

### iii. The tension globule exhibits a linear axis

In the later stages of collapse, tension-driven forces cause sub-globules to compact in an anisotropic manner, generating a visually apparent linear axis. Sub-regions of the tension globule tend to form flat slices perpendicular to the linear axis (Fig S8E). Strikingly, the axial and lateral views of the tension globule are similar to images of metaphase chromatin (S38).

We measured the predominance of the linear axis by computing the typical angle between displacement vectors of regions separated by genomic length  $L$ . Specifically, for each genomic length  $L < N/3$ , we subdivided the polymer into  $N/L$  regions of length  $L$ , and computed the center of mass

of each region. Then, for any three consecutive regions with centroids  $A$ ,  $B$ , and  $C$  respectively, we computed the angle between the vectors  $AB$  and  $BC$ , and averaged all such angles. This measurement distinguished the internal structure of the tension and fractal globule (Fig S8D). Fractal globules have displacement angles around 90 degrees or less for all values of  $L$ , while tension globules have obtuse displacement angles for large values of  $L$ .

### iv. The tension globule is unknotted

To evaluate the topological state of the tension globule, we computed the determinant of the Alexander polynomial, a knot invariant. A value of 1 indicates an unknot; large values reflect high levels of knottedness. The Alexander polynomial determinant was computed in Knotplot using the “alex” command, with the two endpoints of the globule joined along the exterior to create a closed contour. Fig S8G shows the values obtained for 100 tension globules compared to 100 equilibrium globules (8), with each globule containing 4,000 monomers. Tension globules are comparatively highly unknotted.

### v. Tension vs. fractal structure depends on ratio of internal and external forces

Simulations incorporating both internal inter-monomeric Lennard-Jones forces  $U_{pair}$  and external crowding forces  $U_{ext}$  showed a transition between fractal and tension globule behavior (Fig 4A). The relative strengths of these forces were varied by changing the values of  $\epsilon_{LJ}$ , the Lennard-Jones coefficient, and  $k_{ext}$ , the external force coefficient. In order to renormalize the force strengths to have the same potential energy at unit distance, the ratio of internal to external force strengths was computed as  $R = \epsilon_{LJ}/(k_{ext}/2)$ . The values of  $\epsilon_{LJ}$  and  $k_{ext}$  were each varied between 1 and 0.0001 in order to achieve values of  $R$  between 0.0002 and 2000. All simulations used 10Mb polymers and  $t_{damp} = 30$ , and the contact probability scaling was measured between 15kb and 1Mb.

Fractal globules are necessarily simulated in the absence of temperature because introduction of thermal fluctuations produces a length scale and prevents full compaction of the globule. On the other hand, low-temperature simulations with strong Lennard-Jones forces do not collapse fully and instead stagnate in an extended, stringy position. To accurately transition between the two regimes, simulation temperature was varied together with the Lennard-Jones coefficient as  $T = \min(1.0, 2\epsilon_{LJ})$ . Exact parameter values and scaling exponents are listed in Table S4B.

The fractal-tension transition was also simulated using the Yukawa potential for intermonomeric forces (Fig S10). The crushing force was fixed in strength at  $k_{ext} = 10$  while the Yukawa coefficient  $\epsilon_{Yukawa}$  varied in strength from 0.001 to 1. Weakly-screened Yukawa forces ( $m = 0.2$ ) were chosen. Simulations with weakly-screened Yukawa forces do not require thermal fluctuation for full collapse, so all simulations were performed with  $T = 0$  and  $t_{damp} = 10$ . Exact parameter values are listed in Table S4C.

### vi. Contact probability of simulated loop domains matches experimental observations

Loop domains of size 500kb and 1Mb were simulated as described in Section III.a.v. Simulations of 500kb loops used 10Mb polymers with 18 loops separated by 50kb of spacing. Simulations of 1Mb loops used 10Mb polymers with 9 loops separated by 50kb of spacing. Contact probability was aggregated over  $N = 50$  globules and computed on 100kb windows running through the center of each domain. By running multiple replicates, contact probability scalings were computed for a total of 36 500kb loop domains and 27 1Mb loop domains

(Fig S11B). Mean  $\gamma$  value of 0.768 (standard deviation 0.077) was in excellent agreement with intra-domain values of  $\gamma$  measured from Hi-C data.

## d. Analysis of the extrusion model

### i. Contact probability of extruded domains matches experimental observations

To determine the contact probability exponent of the extrusion model, we simulated 3Mb polymers each containing three loop domains of size 980kb separated by 20kb. These domains were formed using binding strengths of 0.9 and placed at 10kb/1010kb/2010kb (forward) and 990kb/1990kb/2990kb (reverse). A total of 140 replicates were run for 4,000 extrusion steps and contacts were measured after 2,000 and 4,000 steps. Every set of 20 replicates was aggregated, contact probability was measured through a 100kb locus at the center of each of the three domains (Fig. 5C), and values of  $\gamma$  were found to be  $0.72 \pm 0.06$  between distances of 20kb and 400kb (the edge of the domain) for these 42 simulated extrusion domains, in excellent agreement with intra-domain values of  $\gamma$  measured from Hi-C data.

While a large proportion of Hi-C domains are associated with loops at their corners, domains may appear in many contexts; e.g. without associated loops or at compartment flips (8). The values of  $\gamma$  remain similarly around 0.75 across the wide variety of domains observed. Note that a contact probability scaling of  $\gamma \approx 0.75$  for loop-less domains is also well-explained by the extrusion model. Indeed, loop extrusion simulations will exhibit scalings around 0.75 even in the absence of CTCF-binding motifs that cause loops to form.

### ii. The extrusion model accurately recapitulates Hi-C contact maps, including loops and domains

We computed binding strengths from CTCF ChIP-seq tracks of four regions of the genome from GM12878 cells and simulated those regions polymers undergoing loop extrusion. Specifically, we simulated chr 4: 20.3-22.6Mb; chr 3: 62-64Mb; chr 5: 110.45-111.75Mb; chr 7: 15-17.5Mb. Simulations were run with temperature  $T = 2.0$  and  $t_{damp} = 10$  for 200,000 time steps to collapse the polymer from an extended state and then 4,000 extrusion steps (each 200 time steps). At least 100 replicates were run for each region. Domains and loops are evident in the contact map after around 500 extrusion steps. Contact maps were aggregated for simulations at 1,000, 2,000, 3,000, and 4,000 extrusion steps. (Substantial reorganization occurs due to continuous extrusion, so the structures at these times are not similar.) In all cases, the contact maps of the simulated polymers accurately recapitulated the contact maps observed from Hi-C (Fig 5D, Fig S12D).

### iii. The extrusion model accurately predicts changes in 3D structure after CRISPR editing

The extrusion model accurately recapitulates Hi-C contact maps by assigning extrusion complex binding strengths from CTCF ChIP-seq data with a single normalization constant. From this wild-type model, we were able to generate de novo predictions for the Hi-C contact map after CTCF motifs have been deleted or reversed using genome-editing. Focusing on three regions containing triples of loci which form three loops, we generated predictions for 13 different deletions and inversions of the CTCF at the loci (Table S4E). In every single case, the extrusion model correctly predicted the positioning of loops and domains in the corresponding genome-editing experiments (Fig 7, Fig S14-16, Section I.d). Experiments were performed in Hap1 cells for which high-quality CTCF ChIP-

seq tracks were not available, so wild-type simulations used GM12878 ChIP-seq data.

All simulation parameters were tuned to the wild-type maps, and predictions were made simply by altering the extrusion complex binding strengths in a manner similar to the CRISPR experiment. Deletion of a CTCF motif was simulated by altering the binding strength at that location to 0. Inversion of a CTCF motif was simulated by flipping the orientation of the motif at that location.

Note that on chromosome 1, the GM12878 ChIP-seq data showed CTCF binding at two locations near 181.1Mb that are not evident in the Hap1 wild-type contact maps, so the binding strengths of these two loci were dampened in our simulations of the wild-type recapitulation and all predictions for that region (Fig 7B). It is possible that this CTCF signal corresponds to a subdivision of the domain between E and F into two subdomains; however, this is not entirely resolvable by our current Hi-C maps. Because this procedure was followed identically for simulations of wild-type and edited conditions, it does not affect the validity of the *in silico* predictions.

### iv. These properties are robust to changes in the attractive forces and the initial configuration

We find that the state achieved in the extrusion model predominantly results from the extrusion dynamics and not from the exact physics of the system. Changes in viscosity and temperature did not affect results (Fig S12A). Notably, loop extrusion produced very similar contact maps (Fig S12A) and contact probability scaling (Fig S12B) when performed using inter-monomeric attractive forces or using a global attractive potential. (Extrusion alone is not sufficient, however, as some attractive forces are required for collapse.) Moreover, because the extrusion simulations represent a steady state, the results described are identical when the simulation is started from an extended chain or a collapsed state, such as a tension globule or a fractal globule (Fig S12A).

### v. The extrusion model predicts that loops will be intra-chromosomal and tend to be short

The extrusion model makes particular predictions about the distribution and locations of loops. First, the sliding of the extrusion complex necessitates that the resulting loops are formed between two loci on the same chromosome. This is in contrast to a model in which loops are formed when anchors come into close contact through random diffusion, which would allow for inter-chromosomal looping. Indeed, in our Hi-C maps we have observed no loops occurring between two distinct chromosomes (8).

Second, in the extrusion model, genomic distances at which loops are formed is limited by the processivity of the extrusion complex. Thus, although loops could hypothetically form between any two loci on the same chromosome, the extrusion model predicts that the loops formed will tend to be relatively short. Indeed, median length of loops observed in our GM12878 Hi-C map was around 275kb (8).

### vi. Loop extrusion promotes an unentangled, unknotted topology

Classically, loops of DNA were thought to occur through a diffusive process, much like numerous other mechanisms in the cell, that randomly brought the loop anchors into close proximity in 3D. However, uncontrolled diffusion and subsequent looping would drive the chromatin fiber towards a highly entangled state. In contrast, loop extrusion promotes a disentangled state by forming a small loop and growing the size of the loop locally as the extrusion complex processes across the DNA (Fig S12F). We observe that two well-mixed domains in

simulation tend to un-mix when extrusion complexes repeatedly act upon the polymer. Loop extrusion in the cell may play a crucial role in keeping the chromatin fiber unentangled and locally accessible.

Loop extrusion could also play a role in controlling or reducing the knottedness of the chromatin fiber. Note that if the actual loading of the extrusion complex creates a knot (e.g. a trefoil knot), the knot would persist, but not get complexified, during the subsequent extrusion. In general, sliding of the extrusion will not change the knottedness, in contrast to diffusion-based looping, and would instead slide knots along the chromatin fiber. In fact, this suggests a potential mechanism for unknotting DNA through synergistic action of the extrusion complex and topoisomerase II. As loop extrusion slides and tightens existing knots, purely random passage of double-stranded DNA by topoisomerase II would drive the fiber towards an unknotted state.

### e. The tension globule and the extrusion model are consistent with 3D DNA FISH measurements

Physical 3D distances between 30kb-wide loci were measured experimentally using three-color 3D DNA FISH as described in Section I.c. Three different regions were measured in IMR90, yielding 3D distance distributions between 5 pairs of loci at 4 genomic distances: 320kb, 490kb, 545kb, and 1,090kb. All pairs of loci lie within a single contact domain. Locations of loci are listed in Table S5.

Tension globule distance distributions were measured from simulation #1 (Table S4A) while extrusion model distance distributions were measured from simulation #79 (Table S4E). For each genomic distance, several pairs of monomers with the appropriate genomic separation were chosen randomly from each simulation and the 3D distances were measured.

The diameter of a single monomer was chosen to represent a length of 0.65 $\mu$ m to produce the best fit between experimental and simulated distance histograms. The two-sample Kolmogorov-Smirnov (K-S) test was used to determine how well each pair of distributions match. The mean K-S test statistic was 0.15 for the tension globule vs. experimental data (Fig S13B), 0.19 for the extrusion model vs. experimental data (Fig S13C), and 0.18 for the two different FISH pairs at the same genomic distance.

### f. SMC3 and RAD21 are positioned on loop anchors 20bp towards the loop interior

A list of the most probable CTCF binding sites was assembled as described in Section III.b.i. From this list, we identified CTCF sites that are the unique CTCF motif within the loop anchor (8), and partitioned these loop anchor CTCF sites into two groups corresponding to the upstream or the downstream loop anchors. Next, we plotted ChIP-seq signals for SMC3 (SYDH TFBS) and RAD21 (two replicates from HAIB TFBS and SYDH TFBS) relative to the CTCF binding sites, aggregated over all sites in each group (S37). As previously demonstrated, there is a strong enhancement of interactions of both proteins near CTCF binding sites. However, we also observed an additional bias of the interaction position: interaction of SMC3 or RAD21 is shifted 20bp towards the interior of the loop (Fig S18). When averaged over both loop anchors or over all CTCF motifs, SMC3 or RAD21 interactions show no such positional bias. Interactions of CTCF protein at CTCF sites (UTA TFBS) show a slight shift towards the exterior of the

loop.

### g. Monte Carlo simulations of large fractal globules using Confined-BFACF

Studying densely packed polymers is an area of interest as it related to many important biological entities, for example DNA in a nucleus. One common way to study densely packed polymers is to model the polymers using molecular dynamics simulations. However, these simulations can get cumbersome - the computational complexity is often  $O(N^2)$ , making studying long chains (with  $N = 104$  to  $106$ ) in three spatial dimensions rather difficult.

An alternative approach is to model polymers as self-avoiding walks on a lattice. While real polymers are obviously not constrained such that their monomers lie on a lattice, nevertheless it is thought that these lattice walks share many properties with real polymers. We further restrict our exploration here to self-avoiding lattice polygons, i.e. polymers whose ends are connected, so that the topology of the polymers may be specified.

To generate these polymers, we use a novel algorithm called Confined-BFACF, which we adapted from the previously described Markov Chain Monte Carlo algorithm BFACF (S39, S40). Confined-BFACF was used to generate the fractal globule shown in Figure 3B. In this algorithm, each iteration of BFACF accepts a lattice self-avoiding polygon (SAP) as input and outputs a SAP. At every iteration, the algorithm picks an edge of the current SAP at random and proposes to move that edge by one unit in one of the 4 directions perpendicular to the edge. To keep this edge connected with the rest of the polymer, the vertices connected to the edge may then need to be deleted, or new ones will need to be added, depending on the result of the translation. Edge translations fall into three categories: negative moves, where two vertices must be deleted; positive moves, where two vertices must be added; and neutral moves, where the net change in number of vertices is zero. The probability with which the algorithm chooses a direction to move the edge in is pre-computed by first determining which of the three categories such a move would result in (positive, negative, or neutral), and weighing the direction probabilities accordingly. The parameter  $z$  determines the relative probability of the algorithm choosing positive, negative, or neutral moves:  $p(\text{positive}) = z^2/(1 + 3z^2)$ ,  $p(\text{negative}) = 1/(1 + 3z^2)$ , and  $p(\text{neutral}) = (1 + z^2)/(2 + 6z^2)$  (a fifth option of not moving the edge at all is given such that the probabilities add to 1).

Once a move is proposed, the algorithm checks to see if the move violates self-avoidance, in which case the move is rejected and the previous SAP is retained for that iteration. When running Confined BFACF, the SAP is initially placed in the center of a containing volume. At each iteration, the algorithm checks if the proposed move will cause the SAP to go outside the containing volume, in which case the move is rejected.

To create large unknotted spherical globules, a small unknot (typically 6 monomers) is placed in the center of a confining spherical volume. The algorithm is run with a bias towards growing, typically with  $z = 5$ , and the algorithm is run until the polymer has filled up the confining volume. The BFACF algorithm preserves the topology of the polygon (S41), so the final configuration of the polymer, though contorted and random, is still topologically unknotted.

## IV. Mathematical theory

### a. Introduction

Loosely speaking, a *fractal* is a mathematical object which can be broken down into parts with each part similar to the original whole. A fractal exhibits fine structure at arbitrarily small scales as a result of its self-similarity. Beyond their fascinating and beautiful mathematical properties, fractals have found numerous applications in modeling natural phenomena and data compression.

Many fractals are constructed through an iterative process. This construction may be understood geometrically, where a finite path is chosen to form a *base motif*, a *rewrite rule* is defined which positions multiple shrunken copies of the base motif and connects them into a more complex path, and this process is iterated ad infinitum. For example, this iterative construction of the Dragon curve is shown in Figure 3A. Section 5 discusses these constructions in a manner that avoids mathematical abstraction and may be instructive for the general reader.

In Section 2, we present a general mathematical construction of self-similar curves. For example, the same Dragon curve can be defined via the iterative action of two contracting similarities mapping  $\mathbb{R}^2 \rightarrow \mathbb{R}^2$ :

$$\begin{aligned}\Phi_0(x, y) &= \rho_{-\pi/4}(x/2, y/2), \\ \Phi_1(x, y) &= \rho_{\pi/4}(x/2, y/2) + (\sqrt{2}/2, \sqrt{2}/2),\end{aligned}$$

where  $\rho_\theta : \mathbb{R}^2 \rightarrow \mathbb{R}^2$  is a counterclockwise rotation of angle  $\theta$  around the origin. Beginning with the compact set  $A_0 = \{0\} \times [0, 1] \subset \mathbb{R}^2$ , we recursively define

$$A_k = \Phi_0(A_{k-1}) \cup \Phi_1(A_{k-1}).$$

The first few iterations exhibit increasingly rough behavior (Fig 3A). The sets  $\{A_k\}_{k=0}^\infty$  converge to a compact set  $\mathcal{A}$ , a *self-similar set*. For each  $k$ ,  $A_k$  is parameterizable by a continuous curve  $f_k : I \rightarrow A_k$ , where  $I := [0, 1]$ , and the limit set  $\mathcal{A}$  is traced out by the limit function  $f = \lim f_k$ . This continuous map  $f : I \rightarrow \mathcal{A}$  is an example of a *self-similar curve*.

In fact, the Dragon curve is also a *space-filling curve* since the path it traces forms a two-dimensional set. This iterative method was used by Giuseppe Peano in 1890 to create the first space-filling curve. The *Peano curve* traces out a two-dimensional square, defying conventional wisdom at the time which held that higher-dimensional sets were “too large” to be covered by lower-dimensional sets by a continuous mapping.

It is useful to extend the notion of *dimension* to non-integral values in order to understand and compare complicated fractal sets. For example, the boundary of the Dragon curve (Fig 3A) has zero two-dimensional area, yet it is so finely folded that it has infinite one-dimensional length. Thus, in some sense it is larger than 1D but smaller than 2D.

Based on this intuition, there are two common ways to measure non-integral dimensions: the *box-counting dimension* (also known as the *Minkowski dimension*) and the *Hausdorff dimension*. These measures are consistent with our usual notion of integral dimension – that is,  $\mathbb{R}^n$  has box-counting and Hausdorff dimension both equal to  $n$  – and can be used to compare the “sizes” of many different fractal sets.

The box-counting dimension is more commonly used in applied settings because it can be easily measured on data. The general notion is to perform some measurement  $N_\delta(X)$  on  $X$  “at the scale  $\delta$ ” and see how the measurement varies as  $\delta$  grows small. If the measurement exhibits a power law  $N_\delta(X) \sim \delta^{-d}$ , then the box-counting dimension is defined to be  $d$ . Typically,

$N_\delta(X)$  counts the number of boxes in an overlaid grid with side length  $\delta$  that intersect the set  $X$ .

The Hausdorff dimension similarly measures the size of a set at infinitesimally small scales. However, it is more sensitive, using infinite covers of sets with diameter at most  $\delta$ , making the Hausdorff dimension more difficult to empirically calculate and cleaner to manipulate theoretically. First, the  $s$ -dimensional Hausdorff measure of a set  $X$ , denoted  $\mathcal{H}^s(X)$ , is defined as

$$\liminf_{\delta \rightarrow 0} \left\{ \sum_{i=1}^{\infty} \text{Diameter}(U_i)^s : \{U_i\} \text{ is a } \delta\text{-cover of } X \right\}.$$

Then there is some critical value  $s_0$  for which  $\mathcal{H}^s(X) = \infty$  when  $s < s_0$  and  $\mathcal{H}^s(X) = 0$  when  $s > s_0$ . The value  $s_0$  is defined to be the *Hausdorff dimension* of  $X$ .

The box-counting and Hausdorff dimensions are often equal for many tractable sets, including any self-similar set. An rigorous overview of the properties of the box-counting and Hausdorff dimensions can be found in a number of standard texts (S43, S44).

After understanding the dimension of the image of a self-similar curve, it is natural to ask next about dimensions of subsets of the curve. For example, what is the dimension of the set of points in  $[0, 1]$  which map to a given line intersecting the Dragon curve? (Fig 3A) Yet, in the 125-year history of self-similar curves, it is not known how they transform dimensions of sets other than the entire unit interval. In general, dimension behaves unpredictably for arbitrary smooth maps.

Transformation of Hausdorff dimension has been explored greatly in the field of stochastic processes. In 1955, McKean proved a dimension scaling result for two-dimensional Brownian motion, showing that if  $B$  is a Brownian motion path in  $\mathbb{R}^2$  and  $X \subset (0, \infty)$ , then

$$\dim_H B(X) = 2 \cdot \dim_H X$$

almost always (13).

In Section 3 we prove an original theorem, a deterministic analog of McKean’s theorem, showing that self-similar curves scale the dimension of any subset of  $I$ . That is, if the self-similar curve  $f : I \rightarrow \mathbb{R}^n$  has  $d$ -dimensional image, then

$$\dim f(X) = d \cdot \dim X$$

for any  $X \subset I$ , where  $\dim$  denotes either Hausdorff or box-counting dimension.

Measurements of a contact probability power law  $I(s) \sim s^{-\gamma}$  have emerged as a crucial tool for linking measurements of spatial contacts of nuclear DNA to models of its folded structure. The fractal globule model has been shown to exhibit values of  $\gamma$  between 1 and 1.2, but it is unclear what range of exponents can be achieved by general fractal models of folding. By computing contacts of finite self-similar paths, we apply our dimension scaling result to characterize contact probability scalings of a wide range of fractal structures (Fig S3, Table S3).

In Section 4, we derive an explicit formula for  $\gamma$  for a self-similar curve  $f$ . First, we show that the contact probability exponent effectively measures the box-counting dimension of the contact map. Next, we apply our dimension scaling result to compute the dimension of the contact map in terms of the packing density  $d_i = \dim_B \text{Image}(f)$  and the surface roughness  $d_e = \dim_B \text{Exterior}(\text{Image}(f))$ . Specifically, we show that finite self-similar paths converging to  $f$  will have contact probability exponent  $\gamma = 2 - d_e/d_i$ . Since  $0 \leq d_e < d_i$ , any fractal model will have  $1 < \gamma \leq 2$  and thus cannot explain the exponents of  $\gamma = 0.75$  observed for Hi-C contact domains.

The boundary case of  $\gamma = 2$  can be achieved when  $d_e = 0$ , such as for the Sierpinski arrowhead curve (Fig S3). Values

of  $\gamma$  arbitrarily close to 1 are only achieved when the exterior dimension nearly matches interior dimension. In Section 5, we construct an original family of self-similar space-filling curves, dubbed “Inside-Out Hilbert curves”, with arbitrarily rough boundaries and  $\gamma$  arbitrarily close to 1, the first curves of this kind.

## b. Construction of self-similar curves

A *self-similar curve* is a curve which can be decomposed into parts each directly similar to the whole. Classically, self-similar curves are constructed by choosing a short lattice path to serve as a base motif and iteratively constructing exponentially longer paths. The self-similar curve is the mathematical limit of this process. Several examples are shown in Fig. S3. Here we outline a formal definition of self-similar curves in terms of iterated function systems.

Let  $X$  be a closed subset of  $\mathbb{R}^n$  and let  $|x|$  denote the vector length of  $x \in X$ . The map  $\Phi : X \rightarrow X$  is called a *contracting similarity* if there is a constant  $c$  with  $0 < c < 1$  such that  $|\Phi(x) - \Phi(y)| = c \cdot |x - y|$  for all  $x, y \in X$ .

**Definition 1.** Given  $X \subset \mathbb{R}^n$  and  $N \geq 2$ , a family of contracting similarities  $\{\Phi_0, \dots, \Phi_{N-1}\}$  with  $\Phi_i : X \rightarrow X$  for all  $i$  is called an *iterated function system on  $X$* , abbreviated as *IFS*. An *attractor of an IFS* is a non-empty compact set  $\mathcal{A} \subset X$  that satisfies

$$\mathcal{A} = \bigcup_{i=0}^{N-1} \Phi_i(\mathcal{A}). \quad [1]$$

In fact, every IFS uniquely defines an attractor  $\mathcal{A}$ . If  $A_0 \subset X$  is any non-empty compact set and  $A_{k+1} = \bigcup_{i=0}^{N-1} \Phi_i(A_k)$  for each  $k \in \mathbb{N}$ , then the sequence  $(A_k)_{k \in \mathbb{N}}$  converges to  $\mathcal{A}$  (S44, S45).

An IFS describes the self-similar structure of its unique attractor set  $\mathcal{A}$ . Here we define *self-similar curves*, a continuous surjective function  $f : [0, 1] \rightarrow \mathcal{A}$  that respects the self-similarity imposed by the IFS. To construct a self-similar curve on  $\mathcal{A}$ , we first define a notion of indexing the self-similar set  $\mathcal{A}$ .

Let  $\Omega_N$  denote the collection of all finite-length sequences of integers in  $\{0, \dots, N-1\}$ ;  $\Omega_N^k$  denote the collection of sequences in  $\Omega_N$  with length  $k$ ;  $\Omega_N^\infty$  denote the collection of all infinite sequences of integers in  $\{0, \dots, N-1\}$ . Given  $\omega = (i_1, i_2, \dots) \in \Omega_N^\infty$ , one can show that there is a unique point  $x_\omega$  such that

$$\bigcap_{k=1}^{\infty} \Phi_{i_1} \circ \dots \circ \Phi_{i_k}(\mathcal{A}) = \{x_\omega\}.$$

Define the *indexing function*  $\rho_{\mathcal{F}} : \Omega_N^\infty \rightarrow \mathcal{A}$  that maps the index  $\omega \in \Omega_N^\infty$  to the associated point  $x_\omega \in \mathcal{A}$ . Notice that

$$\Phi_j \circ \rho_{\mathcal{F}}(i_1, i_2, \dots) = \rho_{\mathcal{F}}(j, i_1, i_2, \dots) \quad [2]$$

for any  $(i_1, i_2, \dots) \in \Omega_N^\infty$  and  $j \in \{0, 1, \dots, N-1\}$ .

**Construction 2. (Self-Similar Curve)** Let  $\mathcal{A}$  be the attractor of the IFS  $\mathcal{F} = \{\Phi_0, \dots, \Phi_{N-1}\}$  on  $\mathbb{R}^n$ . Subdivide the unit interval  $I = [0, 1]$  into  $N$  parts given by subdivisions  $0 = x_0 < x_1 < \dots < x_N = 1$ . Construct the IFS on  $I$  given by  $S = \{\sigma_0, \dots, \sigma_{N-1}\}$  where  $\sigma_k(t) = (x_{k+1} - x_k)t + x_k$ ; that is,  $\sigma_k$  maps  $I$  to  $[x_k, x_{k+1}]$ . Consequently,  $I$  is the attractor of  $S$ .

Define a function  $f_{S, \mathcal{F}} : I \rightarrow \mathcal{A}$  by requiring that  $f(\rho_S(\omega)) = \rho_{\mathcal{F}}(\omega)$  for all  $\omega \in \Omega_N^\infty$ . With this definition, the value of  $f_{S, \mathcal{F}}$  on  $\{x_k\} = \sigma_{k-1}(I) \cap \sigma_k(I)$  is ambiguous. It is necessary to ensure that the “ends are connected.” That is, write  $a_0 := \rho_{\mathcal{F}}((0, 0, \dots)) = \Phi_0(a_0)$  and  $a_{N-1} := \rho_{\mathcal{F}}((N-1, N-1, \dots)) = \Phi_{N-1}(a_{N-1})$ , and then require  $\Phi_k(a_{N-1}) = \Phi_{k+1}(a_0)$  for

$k = 0, \dots, N-2$ . One can verify that  $f_{(S, \mathcal{F})}$  is then well-defined and automatically continuous.

The function  $f_{S, \mathcal{F}}$  constructed in this manner is said to be the *self-similar curve described by  $(S, \mathcal{F})$* . This construction captures the notion of self-similarity through the iterated function systems since  $f_{S, \mathcal{F}}$  restricted to  $\sigma_k(I)$  behaves as  $f_{S, \mathcal{F}}$  on  $I$  with  $f_{S, \mathcal{F}} \circ \sigma_k \equiv \Phi_k \circ f_{S, \mathcal{F}}$ . See Fig S4A for an example of an IFS that describes the Hilbert curve.

In many cases, there is a simple formula which computes the dimension of a self-similar set from the contracting ratios of the associated IFS. First, one must verify that the sets  $\Phi_i(\mathcal{A})$  do not overlap significantly:

**Definition 3.** The IFS  $\{\Phi_0, \dots, \Phi_{N-1}\}$  on  $\mathbb{R}^n$  satisfies the *open set condition* if there exists a bounded, non-empty open set  $\mathcal{U} \subset \mathbb{R}^n$  such that

- I.  $\Phi_i(\mathcal{U}) \subset \mathcal{U}$  for all  $i = 0, \dots, N-1$ ;
- II.  $\Phi_i(\mathcal{U}) \cap \Phi_j(\mathcal{U}) = \emptyset$  when  $i \neq j$ .

Write the Hausdorff dimension of  $X \subset \mathbb{R}^n$  as  $\dim_H X$  and the Minkowski or “box-counting” dimension as  $\dim_B X$ . Write the  $s$ -dimensional Hausdorff measure of  $X$  as  $\mathcal{H}^s(X)$ . The following simple formula can be used to compute the dimension of the attractor set (S43):

**Theorem 4.** Let  $\mathcal{F} = \{\Phi_0, \dots, \Phi_{N-1}\}$  be an IFS of contracting similarities on  $\mathbb{R}^n$  that satisfies the open set condition. Suppose  $\Phi_i$  has similarity ratio  $R_i < 1$  and  $\mathcal{A}$  is the attractor of  $\mathcal{F}$ . Let  $s > 0$  be the unique solution to

$$\sum_{i=0}^{N-1} R_i^s = 1. \quad [3]$$

Then  $\dim_H \mathcal{A} = \dim_B \mathcal{A} = s$  and  $0 < \mathcal{H}^s(X) < \infty$ .

## c. Dimension scaling theorem for self-similar curves

### i. Overview

We investigate how a fractal curve  $f$  transforms the dimension of subsets of the unit interval. It is known how to compute the dimension of the image of  $f$  using methods such as Theorem 4. We prove a formula relating the dimension of  $f(X)$  to the dimension of  $X$  for a general set  $X \subset [0, 1]$ .

Hausdorff and box-counting dimensions often behave poorly under transformations – in general, dimension is not preserved under a homeomorphism. However, transformation of Hausdorff dimension has been explored greatly in the field of stochastic processes. In 1955, McKean proved a dimension scaling result for two-dimensional Brownian motion – if  $B$  is a Brownian path in  $\mathbb{R}^2$  and  $X \subset (0, \infty)$ , then  $\dim_H B(X) = 2 \cdot \dim_H(X)$  almost always (13). Since the image of the full Brownian path has dimension 2 almost always, McKean’s result can be restated as

$$\dim_H B(X) = \dim_H \text{Image}(B) \cdot \dim_H X. \quad [4]$$

In 1961, Blumenthal and Gettoor conjectured that equation [4] holds when  $B$  is a Lévy processes, a generalization of Brownian motion (S46). While this conjecture turns out to be false in general, numerous researchers have since computed  $\dim_H B(X)$  under various conditions on  $X$ ,  $B$ , or both. In 2005, Khoshnevisan and Xiao showed a general formula for  $\dim_H B(X)$  in terms of  $X$  (S47, Corollary 2.6).

In fact, a general class of deterministic fractal curves do transform dimensions in a uniform manner. In this section, we give a proof of this original result. The fractal curves under consideration are defined as follows:



**Definition 5.** Let  $f : I \rightarrow \mathbb{R}^n$  be a fractal curve described by the IFSs  $S = \{\sigma_0, \dots, \sigma_{N-1}\}$  on  $I$  and  $\mathcal{F} = \{\Phi_0, \dots, \Phi_{N-1}\}$  on  $\mathbb{R}^n$  as in Construction 2. Let  $r_i$  be the scaling ratio of  $\sigma_i$  and let  $R_i$  be the scaling ratio of  $\Phi_i$ , for  $i = 0, \dots, N-1$ . We say that the fractal curve  $f$  is balanced if  $\mathcal{F}$  satisfies the open set condition and there is some constant  $\beta$  such that

$$r_i = R_i^\beta \quad \text{for } i = 0, \dots, N-1. \quad [5]$$

The uniform dimension scaling of fractal curves is characterized by the following theorem, a deterministic analogue to McKean's Theorem. The result applies to any subset of the unit interval that is a Borel set, a very general class that includes any sets that can be formed from open sets using the operations of countable union, countable intersection, or complementation.

**Theorem 6.** Suppose that  $f : I \rightarrow \mathbb{R}^n$  is a balanced fractal curve with image  $\mathcal{A} = f(I)$ , and let  $d = \dim_H \mathcal{A} = \dim_B \mathcal{A}$ . Then for all Borel sets  $X \subset I$ ,

$$\dim_H f(X) = d \cdot \dim_H X \quad \text{and} \quad \dim_B f(X) = d \cdot \dim_B X.$$

The proof is given below in two parts, separately proving an upper bound and a lower bound on the dimension of  $f(X)$ . We first prove an upper bound (Corollary 9) by showing that  $f$  is  $\alpha$ -Hölder with  $\alpha = 1/d$  and  $d = \dim f(I)$ . This arises naturally because the self-similar structure of  $f$  guarantees that small distances in the domain are mapped to correspondingly small distances in the range. Next, we prove a lower bound (Lemma 14) by using Frostman's Lemma to pick a subset  $X_0 \subset X$  for which small balls in  $X_0$  have small Hausdorff measure relative to their radius. We then show that the push-forward by  $f$  of the Hausdorff measure on  $X_0$  gives a measure  $\mu$  on  $f(X_0)$  that satisfies the mass principle  $\mu(U) \leq c|U|^s$  for all sufficiently small  $U$  and a particular  $s$ . This gives a lower bound on  $\dim_H f(X_0)$  and thus a lower bound on  $\dim_H f(X)$ . The lower bound on  $\dim_B f(X)$  follows similarly.

The condition that  $f$  is balanced is necessary for the uniform dimension scaling result to hold. Given distinct  $\alpha, \beta < 1/2$ , define  $f_{\alpha, \beta} : I \rightarrow I$  as the fractal curve described by  $(\mathcal{F}_\alpha, \mathcal{F}_\beta)$  as in Construction 2, where

$$\mathcal{F}_\alpha := \{t \mapsto at, \quad t \mapsto (1-2a)t + a, \quad t \mapsto 1 - a(1-t)\}$$

for  $a = \alpha, \beta$ . If  $f$  is not required to satisfy equation [5], precomposing with  $f_{\alpha, \beta}$  (Fig S4B) would change the way the function transforms dimension of specific subsets of  $I$  when  $\alpha \neq \beta$ .

In practice, one often wants to take a self-similar set  $\mathcal{A}$ , the attractor of some IFS  $\mathcal{F}$ , and trace it entirely as the image of a fractal curve. In this instance, the values of the  $R_i$  are given and one can define an IFS  $S$  on  $I$  with the appropriate  $r_i$  so that the fractal curve described by  $S$  and  $\mathcal{F}$  is balanced. In any motif-based construction, the scaling ratios  $R_i$  are all equal and one can simply choose  $r_i = 1/N$  for each  $i$ .

## ii. An upper bound on $\dim f(X)$

A function  $f : \mathbb{R}^m \rightarrow \mathbb{R}^n$  is  $\alpha$ -Hölder if there exists some  $c > 0$  such that  $|f(x) - f(y)| \leq c|x - y|^\alpha$  for all  $x, y \in \mathbb{R}^m$ . This uniform upper bound on the way that  $f$  transforms distances gives an upper bound on the way it transforms dimensions (S43).

**Lemma 7.** Suppose that  $f : A \subset \mathbb{R}^m \rightarrow \mathbb{R}^n$  is  $\alpha$ -Hölder. Then for any  $X \subset A$ ,

$$\begin{aligned} \dim_H f(X) &\leq \alpha^{-1} \cdot \dim_H X \\ \dim_B f(X) &\leq \alpha^{-1} \cdot \dim_B X. \end{aligned}$$

Given a sequence  $\omega = (i_1, \dots, i_k) \in \Omega_N^k$ , define the shorthand notation  $\Phi_\omega = \Phi_{i_1} \circ \dots \circ \Phi_{i_k}$ . Balanced fractal curves are naturally  $\alpha$ -Hölder because the relation  $f(\sigma_\omega(I)) = \Phi_\omega(\mathcal{A})$  for  $\omega \in \Omega_N$  allows small distances in the domain of  $f$  to govern small distances in the range of  $f$ .

**Lemma 8.** Suppose that  $f : I \rightarrow \mathbb{R}^n$  is a balanced fractal curve with image  $\mathcal{A}$ , and let  $d = \dim_H \mathcal{A} = \dim_B \mathcal{A}$ . Then  $f$  is  $1/d$ -Hölder.

**Proof.** Let  $f$  be a fractal curve described by the IFSs  $\{\sigma_0, \dots, \sigma_{N-1}\}$  on  $I$  and  $\mathcal{F} = \{\Phi_0, \dots, \Phi_{N-1}\}$  on  $\mathbb{R}^n$ . Let  $r_i$  and  $R_i$  be the scaling ratios of  $\sigma_i$  and  $\Phi_i$  respectively, for  $i = 0, \dots, N-1$ . Since  $f$  is balanced, let  $d'$  be the constant such that  $r_i = R_i^{d'}$  for  $i = 0, \dots, N-1$ . Then  $\sum_{i=0}^{N-1} R_i^{d'} = 1$ . Hence, by Theorem 4,  $d' = \dim_H \mathcal{A} = \dim_B \mathcal{A} = d$ .

We now show that  $f$  satisfies

$$|f(s) - f(t)| \leq c|s - t|^{1/d} \quad \text{for all } s, t \in [0, 1]$$

for some constant  $c$ . Let  $r = \min r_i$ . Since  $|f(s) - f(t)| \leq |\mathcal{A}|$  for all  $s, t \in [0, 1]$ , it suffices to prove this equation for  $s, t$  such that  $|s - t| < r$  if we choose  $c \geq |\mathcal{A}|r^{-1/d}$ .

Take  $s, t \in I$  distinct with  $|s - t| < r$ . Truncate each  $(i_1, i_2, \dots) \in \Omega_N^\infty$  after the first index  $i_k$  such that

$$|s - t| \leq r_{i_1} \cdots r_{i_k} \leq |s - t|r^{-1}. \quad [6]$$

(This is always possible since  $|s - t| < r$ .) Let  $\mathcal{Q}$  denote the set of all (finite) sequences obtained in this way. Since every infinite sequence is truncated to some element of  $\mathcal{Q}$ , we have

$$I = \bigcup_{\omega \in \mathcal{Q}} \sigma_\omega(I).$$

Thus, there exist  $\omega, \omega' \in \mathcal{Q}$  such that  $s \in \sigma_\omega(I)$  and  $t \in \sigma_{\omega'}(I)$ . In fact, one can choose  $\omega$  and  $\omega'$  such that  $\sigma_\omega(I)$  and  $\sigma_{\omega'}(I)$  are either equal or adjacent intervals in  $I$ , since each such interval has length at least  $|s - t|$ . We conclude that  $\sigma_\omega(I) \cap \sigma_{\omega'}(I) \neq \emptyset$  and hence  $\Phi_\omega(\mathcal{A}) \cap \Phi_{\omega'}(\mathcal{A}) \neq \emptyset$ . Since  $f(s) \in \Phi_\omega(\mathcal{A})$  and  $f(t) \in \Phi_{\omega'}(\mathcal{A})$ ,

$$\begin{aligned} |f(s) - f(t)| &\leq |\Phi_\omega(\mathcal{A})| + |\Phi_{\omega'}(\mathcal{A})| \\ &= |\mathcal{A}| \prod_{i \in \omega} R_i + |\mathcal{A}| \prod_{j \in \omega'} R_j \\ &= |\mathcal{A}| \prod_{i \in \omega} r_i^{1/d} + |\mathcal{A}| \prod_{j \in \omega'} r_j^{1/d} \\ &\leq 2|\mathcal{A}|r^{-1/d} \cdot |s - t|^{1/d} \end{aligned}$$

by equation [6]. □

Lemma 7 and Lemma 8 immediately imply

**Corollary 9.** Suppose that  $f : I \rightarrow \mathbb{R}^n$  is a balanced fractal curve with image  $\mathcal{A} = f(I)$ , and let  $d = \dim_H \mathcal{A} = \dim_B \mathcal{A}$ . Then for any set  $X \subset [0, 1]$ ,

$$\dim_H f(X) \leq d \cdot \dim_H X \quad \text{and} \quad \dim_B f(X) \leq d \cdot \dim_B X.$$

## iii. A lower bound on $\dim f(X)$

Our proof of the lower bound on the dimension of  $f(X)$  is inspired by the proof of the dimension of attractors (Theorem 9.3 in (S43)). We use the mass distribution principle (Principle 4.2 in (S43)):

**Lemma 10.** Let  $\mu$  be a measure defined on  $X$  with  $\mu(X) > 0$ . Suppose that, for some  $s > 0$ , there exist  $c, \epsilon > 0$  such that

$$\mu(U) \leq c|U|^s \quad \text{for all } U \subset X \text{ such that } |U| \leq \epsilon.$$

Then  $\mathcal{H}^s(X) \geq c^{-1}\mu(X)$  and  $s \leq \dim_H X$ .

The following Lemma by Frostman is often useful in constructing a measure based on the Hausdorff dimension of a set ((S48), Theorem 8.8).

**Lemma 11. (Frostman)** *Suppose that  $X \subset \mathbb{R}^n$  is a Borel set with  $0 < \mathcal{H}^s(X) \leq \infty$ . Let  $B_r(x)$  denote the ball of radius  $r$  centered at the point  $x$ . Then there exists a compact set  $X_0 \subset X$  and a constant  $b$  such that  $0 < \mathcal{H}^s(X_0) < \infty$  and*

$$\mathcal{H}^s(X_0 \cap B_r(x)) \leq br^s$$

for all  $r > 0$  and  $x \in \mathbb{R}^n$ .

To each IFS  $\mathcal{F}$  one can associate, by repeated sub-division, a canonical measure on its attractor  $\mathcal{A}$  that respects its self-similar structure. Consider ‘cylindrical’ subsets of  $\Omega_N^\infty$  defined by

$$\mathcal{O}_{i_1, \dots, i_k} := \{\omega \in \Omega_N^\infty : \omega \text{ begins with } (i_1, \dots, i_k)\}.$$

Let  $s = \dim_H \mathcal{A}$  so that  $\sum_{i=0}^{N-1} R_i^s = 1$ , and define  $\tilde{\mu}$  to be the measure on  $\Omega_N^\infty$  that satisfies  $\tilde{\mu}(\mathcal{O}_{i_1, \dots, i_k}) = (R_{i_1} \cdots R_{i_k})^s$  for each  $(i_1, \dots, i_k) \in \Omega_N$ . Then  $\tilde{\mu}(\mathcal{O}_{i_1, \dots, i_k}) = \sum_{i=0}^{N-1} \tilde{\mu}(\mathcal{O}_{i_1, \dots, i_k, i})$ , so  $\tilde{\mu}(\Omega_N^\infty) = 1$ . One can show that  $\tilde{\mu}$  indeed extends to a measure on all of  $\Omega_N^\infty$ ; it can be alternatively computed as

$$\tilde{\mu}(\mathcal{O}) = \inf \left\{ \sum_{\omega} \tilde{\mu}(\mathcal{O}_\omega) : \mathcal{O} \subset \bigcup_{\omega} \mathcal{O}_\omega \text{ and } \omega \in \Omega_N \right\}.$$

Recall the indexing map associated with  $\mathcal{F}$ ,  $\rho_{\mathcal{F}} : \Omega_N^\infty \rightarrow \mathcal{A}$ .

**Definition 12.** *The canonical measure  $\mu$  on  $\mathcal{A}$  associated with the IFS  $\mathcal{F}$  is the push-forward of the measure  $\tilde{\mu}$  on  $\Omega_N^\infty$  by the indexing function  $\rho$ ; that is,*

$$\mu(A) := \tilde{\mu}(\rho_{\mathcal{F}}^{-1}(A)) \text{ for all } A \subset \mathcal{A}.$$

It is easily checked that the canonical measure  $\mu$  satisfies  $\mu(\mathcal{A}) = 1$  and that  $\mu(\Phi_{i_1, \dots, i_k}(\mathcal{A})) = (R_{i_1} \cdots R_{i_k})^s$  ((S43), Proposition 1.7).

To give the proof of Theorem 4, we require the following small result ((S43), Lemma 9.2):

**Proposition 13.** *Let  $\{U_i\}$  be a collection of disjoint open subsets in  $\mathbb{R}^n$ . Suppose that each  $U_i$  contains a ball of radius  $a_1$  and is contained in a ball of radius  $a_2$ . Then any ball with radius  $r > 0$  intersects at most  $(1 + 2a_2/r)^n (a_1/r)^{-n}$  of the closures  $\bar{U}_i$ .*

**Proof.** If the ball  $B$  with radius  $r > 0$  meets  $\bar{U}_i$ , then  $U_i$  is contained in the ball  $B'$  concentric with  $B$  with radius  $r + 2a_2$ . Now if  $B$  meets exactly  $m$  of the  $\bar{U}_i$ ,  $B'$  contains  $m$  disjoint balls of radius  $a_1$ . By comparing  $n$ -dimensional volumes of these balls, we find that  $m(a_1)^n \leq (r + 2a_2)^n$  which proves the desired result.  $\square$

We complete the proof of Theorem 6 by showing the following result.

**Lemma 14.** *Suppose that  $f : I \rightarrow \mathbb{R}^n$  is a balanced fractal curve with image  $\mathcal{A} = f(I)$ , and let  $d = \dim_H \mathcal{A} = \dim_B \mathcal{A}$ . Then for any Borel set  $X \subset [0, 1]$ ,*

$$\dim_H f(X) \geq d \cdot \dim_H X \text{ and } \dim_B f(X) \geq d \cdot \dim_B X.$$

**Proof.** Let  $f$  be a fractal curve described by the IFSs  $\{\sigma_0, \dots, \sigma_{N-1}\}$  on  $I$  and  $\mathcal{F} = \{\Phi_0, \dots, \Phi_{N-1}\}$  on  $\mathbb{R}^n$ . Let  $r_i$  and  $R_i$  be the scaling ratios of  $\sigma_i$  and  $\Phi_i$  respectively, for  $i = 0, \dots, N-1$ . Since  $f$  is balanced, let  $d'$  be the constant such that  $r_i = R_i^{d'}$  for  $i = 0, \dots, N-1$ . By assumption  $\sum_{i=0}^{N-1} r_i = 1$ , so  $\sum_{i=0}^{N-1} R_i^{d'} = 1$ . Hence, by Theorem 4,  $d' = \dim_H \mathcal{A} = \dim_B \mathcal{A} = d$ .

**Part (i):** Hausdorff dimension.

Fix  $s < \dim_H X$ . Since  $\mathcal{H}^s(X) = \infty$ , by Frostman’s Lemma there exists  $X_0 \subset X$  compact and  $b > 0$  such that  $0 < \mathcal{H}^s(X_0) < \infty$  and

$$\mathcal{H}^s(X_0 \cap B_\rho(x)) \leq b\rho^s \text{ for all } x \in X \text{ and } \rho > 0. \quad [7]$$

Define the measure  $\mu$  on  $f(X_0)$  to be the push-forward by  $f$  of  $\mathcal{H}^s$  restricted to  $X_0$ ; i.e.

$$\mu(A) := \mathcal{H}^s(f^{-1}(A) \cap X_0) \text{ for all } A \subset f(X_0).$$

We will bound  $\mu(B_\rho(y))$  as a function of  $\rho$  for any  $y \in f(X_0)$  and use Lemma 10 to show that  $\dim_H f(X_0) \geq sd$ .

Let  $B$  be a ball of radius  $\rho$  with  $0 < \rho < 1$  and let  $R = \min R_i$ . Truncate each  $(i_1, i_2, \dots) \in \Omega_N^\infty$  after the first index  $i_k$  such that

$$R\rho \leq R_{i_1} \cdots R_{i_k} \leq \rho. \quad [8]$$

Let  $\mathcal{Q}$  denote the set of all (finite) sequences obtained in this way. Let  $\mathcal{U}$  be an open set defined from the open set condition 3 for the IFS  $\mathcal{F}$ . Since the sets  $\{\Phi_i(\mathcal{U}) : i = 0, \dots, N-1\}$  are disjoint, applying the functions  $\{\Phi_i\}$  recursively shows that, for  $\omega, \omega' \in \Omega_N$ ,  $\Phi_\omega(\mathcal{U})$  and  $\Phi_{\omega'}(\mathcal{U})$  are disjoint if and only if neither  $\omega$  nor  $\omega'$  is a prefix of the other. Thus,  $\{\Phi_\omega(\mathcal{U}) : \omega \in \mathcal{Q}\}$  is a collection of disjoint sets. It also follows easily from the open set condition that  $\mathcal{A} \subset \bar{\mathcal{U}}$ . Consequently,

$$\mathcal{A} \subset \bigcup_{\omega \in \mathcal{Q}} \Phi_\omega(\mathcal{A}) \subset \bigcup_{\omega \in \mathcal{Q}} \Phi_\omega(\bar{\mathcal{U}}).$$

Choose  $a_1, a_2 \in \mathbb{R}$  so that  $\mathcal{U}$  contains a ball of radius  $a_1$  and is contained in a ball of radius  $a_2$ . For all  $\omega = (i_1, \dots, i_k) \in \mathcal{Q}$ , the set  $\Phi_\omega(\mathcal{U})$  contains a ball of radius  $a_1(R_{i_1} \cdots R_{i_k})$  and therefore a ball of radius  $a_1 R\rho$ , and is contained in a ball of radius  $a_2(R_{i_1} \cdots R_{i_k})$  and therefore a ball of radius  $a_2\rho$ . Let  $\mathcal{Q}'$  denote the set of sequences  $\omega \in \mathcal{Q}$  such that  $B$  intersects  $\Phi_\omega(\bar{\mathcal{U}})$ . By Proposition 13,  $\mathcal{Q}'$  has at most  $q_1 = (1 + 2a_2)^n (a_1 R)^{-n}$  elements.

Similarly, for some  $\omega \in \mathcal{Q}$  and  $\epsilon > 0$  consider a ball  $B_\omega$  of radius  $a_2\rho \cdot (1 + \epsilon)$  that contains  $\Phi_\omega(\mathcal{U})$ . By Proposition 13,  $B_\omega$  intersects at most  $(1 + 2/(1 + \epsilon))^n (a_1 R/a_2(1 + \epsilon))^{-n}$  of the sets  $\Phi_{\omega'}(\bar{\mathcal{U}})$  for  $\omega' \in \mathcal{Q}$ . Since this is true for all  $\epsilon > 0$ , it follows that  $\Phi_\omega(\bar{\mathcal{U}})$  is disjoint from all but  $q_2 = 3^n (a_1 R/a_2)^{-n}$  of the sets  $\Phi_{\omega'}(\bar{\mathcal{U}})$  for  $\omega' \in \mathcal{Q}$ .

For each  $\omega \in \mathcal{Q}$ , let  $\mathcal{Q}'_\omega = \{\omega' \in \mathcal{Q} : \Phi_\omega(\bar{\mathcal{U}}) \cap \Phi_{\omega'}(\bar{\mathcal{U}}) \neq \emptyset\}$ . For each  $\omega \in \mathcal{Q}$ ,  $\mathcal{Q}'_\omega$  has at most  $q_2$  elements. Since  $f \circ \sigma_{\omega'}(I) \subset \Phi_{\omega'}(\bar{\mathcal{U}})$ , the set  $f^{-1} \circ \Phi_\omega(\bar{\mathcal{U}})$  intersects  $\sigma_{\omega'}(I)$  only if  $\omega' \in \mathcal{Q}'_\omega$ . Thus,

$$\begin{aligned} \mu(B) &\leq \sum_{\omega \in \mathcal{Q}'} \mu(\Phi_\omega(\bar{\mathcal{U}})) \\ &= \sum_{\omega \in \mathcal{Q}'} \mathcal{H}^s(f^{-1} \circ \Phi_\omega(\bar{\mathcal{U}}) \cap X_0) \\ &\leq \sum_{\omega \in \mathcal{Q}'} \sum_{\omega' \in \mathcal{Q}'_\omega} \mathcal{H}^s(\sigma_{\omega'}(I) \cap X_0). \end{aligned} \quad [9]$$

For  $\omega' = (i_1, \dots, i_k) \in \mathcal{Q}$ ,  $\sigma_{\omega'}(I)$  is an interval with length  $r_{i_1} \cdots r_{i_k} = R_{i_1}^{d'} \cdots R_{i_k}^{d'} \leq \rho^{d'}$  by equation [8]. By equation [7],  $\mathcal{H}^s(\sigma_{\omega'}(I) \cap X_0) \leq b(\rho^{d'})^s$ , so

$$\begin{aligned} \mu(B) &\leq \sum_{\omega \in \mathcal{Q}'} \sum_{\omega' \in \mathcal{Q}'_\omega} \mathcal{H}^s(\sigma_{\omega'}(I) \cap X_0) \\ &\leq \sum_{\omega \in \mathcal{Q}'} \sum_{\omega' \in \mathcal{Q}'_\omega} b(\rho^{d'})^s \\ &= q_1 q_2 b \cdot \rho^{ds}. \end{aligned} \quad [10]$$

Since this is true for all balls  $B$  with radius  $\rho$ ,  $\dim_H f(X_0) \geq ds$  by Lemma 10. Because  $X_0 \subset X$ , we have shown that  $\dim_H f(X) \geq \dim_H f(X_0) \geq ds$  for all  $s < \dim_H X$ . Consequently,  $\dim_H f(X) \geq d \cdot \dim_H X$ .

**Part (ii):** Box-counting dimension.

Fix  $\rho > 0$ . Let  $\mathcal{B}$  be a collection of  $K$  balls, each of radius at most  $\rho$ , which covers  $f(X)$ . Define  $\mathcal{Q} \subset \Omega_N$  exactly as in Part (i). Again, each ball  $B \in \mathcal{B}$  intersects at most  $q$  sets in  $\{\Phi_\omega(\bar{\mathcal{U}}) : \omega \in \mathcal{Q}\}$ . Defining  $\mathcal{Q}'$  to be the set of  $\omega \in \mathcal{Q}$  such that  $\Phi_\omega(\bar{\mathcal{U}})$  intersects some  $B \in \mathcal{B}$ , we see that  $\mathcal{Q}'$  has at most  $Kq_1$  elements. Similarly define  $\mathcal{Q}'_\omega$  for each  $\omega \in \mathcal{Q}'$ ; each  $\mathcal{Q}'_\omega$  has at most  $q_2$  elements. From the reasoning in Part (i), it follows that  $f(X) \subset \cup_{\omega \in \mathcal{Q}'} \Phi_\omega(\bar{\mathcal{U}})$  and

$$\begin{aligned} X &\subset f^{-1}(f(X)) \\ &\subset \bigcup_{\omega \in \mathcal{Q}'} f^{-1} \circ \Phi_\omega(\bar{\mathcal{U}}) \\ &\subset \bigcup_{\omega \in \mathcal{Q}'} \bigcup_{\omega' \in \mathcal{Q}'_\omega} \sigma_{\omega'}(I). \end{aligned} \quad [11]$$

As above,  $\sigma_{\omega'}(I)$  is an interval of length at most  $\rho^d$  for all  $\omega \in \mathcal{Q}$ , so  $\{\sigma_{\omega'}(I) : \omega \in \mathcal{Q}', \omega' \in \mathcal{Q}'_\omega\}$  is a cover of  $X$  using at most  $q_1 q_2 K$  intervals with diameter at most  $\rho^d$ .

For  $\delta > 0$  and a set  $A$ , let  $N_\delta(A)$  denote the smallest number of balls of diameter at most  $\delta$  required to cover  $A$ . Equation [11] shows that  $N_{\rho^d}(X) \leq q_1 q_2 K$ . Taking the minimum over all possible  $K$ , we have

$$N_{\rho^d}(X) \leq q_1 q_2 \cdot N_\rho(f(X)).$$

Consequently,

$$\begin{aligned} \dim_B X &= \lim_{\rho \rightarrow 0} \frac{\log N_{\rho^d}(X)}{-\log \rho^d} \\ &\leq \lim_{\rho \rightarrow 0} \frac{\log(q_1 q_2 \cdot N_\rho(f(X)))}{-\log \rho^d} \\ &\leq \lim_{\rho \rightarrow 0} d^{-1} \cdot \frac{\log N_\rho(f(X)) + \log q_1 q_2}{-\log \rho} \\ &= d^{-1} \cdot \dim_B f(X). \end{aligned}$$

□

#### d. Derivation of contact probability critical exponent for self-similar paths

Measurements of the contact probability exponent have emerged as a crucial tool for linking measurements of spatial contacts of nuclear DNA to models of its folded structure. The fractal globule model has been shown to exhibit a contact probability exponent ranging from  $-1$  to  $-1.33$ , but it is unclear what range of exponents can be achieved by general fractal models of folding. By computing contacts of paths constructed by discrete sampling self-similar curves, we apply the theory derived above to characterize contact probability scalings of a wide range of fractal structures. Particularly relevant to chromatin models are motif-based *space-filling curves*, such as the Dragon curve or the Hilbert curve, in which dense packing leads to numerous self-contacts (Fig S3).

In this section, we derive an explicit formula for the contact probability scaling exponent for motif-based self-similar curves. Let  $f$  be such a curve, and set  $d_i = \dim_B f(I) = \dim_H f(I)$ , the interior dimension of the curve. We will also define a set  $E_f$  consisting of the points lying on the exterior of the curve, also known as the *dynamical boundary*, and define the exterior dimension of the curve to be  $d_e = \dim_B E_f$ . When  $f$  is space-filling,  $E_f$  is simply the topological boundary

of the set  $f(I)$ . We will show that the contact probability of finite self-similar paths converging to  $f$  will scale with critical exponent  $d_e/d_i - 2$ .

#### i. Dimension of the contact map derives from surface dimension

For any curve  $f : I = [0, 1] \rightarrow \mathbb{R}^n$ , one can compute the corresponding *contact map*  $\mathcal{C}_f = \{(s, t) \in [0, 1]^2 : f(s) = f(t), s \neq t\}$ . The image of  $\mathcal{C}_f$  is the set of points with multiple preimages, or

$$M_f := \{p \in \mathcal{A} : \exists (s, t) \in \mathcal{C}_f \text{ s.t. } f(s) = f(t) = p\},$$

which we call the *multiple points* of  $f$ . We assume henceforth that  $M_f$  is not empty.

When  $f$  is a balanced self-similar curve described by the iterated function systems  $\mathcal{F} = \{\Phi_0, \dots, \Phi_{N-1}\}$  and  $S = \{\sigma_0, \dots, \sigma_{N-1}\}$ , the dimensions of  $\mathcal{C}_f$  and  $M_f$  can be related using the following variant of the Theorem 6:

**Lemma 15.** *Let  $f$  be a balanced fractal curve with image  $\mathcal{A}$ , contact map  $\mathcal{C}_f \subset I^2$ , and multiple points  $M_f \subset \mathcal{A}$ . Define the map  $g : \mathcal{C}_f \rightarrow M_f$  by  $g : (s, t) \mapsto f(s) = f(t)$ . Then for any Borel set  $X \subset \mathcal{C}_f$ ,*

$$\begin{aligned} \dim_H g(X) &= \dim_H \mathcal{A} \cdot \dim_H X, \\ \dim_B g(X) &= \dim_B \mathcal{A} \cdot \dim_B X \end{aligned}$$

The proof of this result closely follows the proof of Theorem 6 and is given in the Appendix. As a consequence,  $\dim_H \mathcal{C}_f = (\dim_H M_f)/(\dim_H \mathcal{A})$ .

Because of self-similarity,  $M_f$  is dense in  $\mathcal{A}$ , so  $\dim_B M_f = \dim_B \mathcal{A}$ . That is, the box-dimension of the multiple points does not give any information about the prevalence of these self-contacts. Therefore, we consider the points which lie on the exterior of  $\mathcal{A}$  that form external contacts when mapped into the interior of  $\mathcal{A}$ . Formally, choose  $\mathcal{U} \subset \mathbb{R}^n$  such that  $\mathcal{F}$  satisfies the open set condition with  $\mathcal{U}$ , and define the *exterior set*  $E_f$  to be

$$E_f = \{p \in \partial \mathcal{U} \cap \mathcal{A} : \exists \omega \in \Omega_N \text{ s.t. } \Phi_\omega(p) \in M_f\}.$$

We show in the Appendix that  $E_f$  is independent of the choice of  $\mathcal{U}$ . The exterior set, also known as the “dynamical boundary,” generalizes the notion of boundary to self-similar sets. When  $f$  is *space-filling* – that is, it contains and is contained in open  $n$ -dimensional balls –  $E_f$  coincides with  $\partial \mathcal{A}$ , the topological boundary of  $\mathcal{A}$  ((S49), Proposition 2.8).

In particular, since  $M_f$  is a countable union of images of  $E_f$ ,  $\dim_H E_f = \dim_H M_f$ , and thus the dimension of the contact map can be computed as the ratio of the dimensions of the boundary and the interior. Furthermore, when  $E_f$  is compact,  $\dim_B E_f = \dim_H E_f$  (see Proposition 17), enabling the boundary dimension to be computed with a box-counting measurement. We call this common value the *exterior dimension* of  $f$ , denoted  $d_e$ . Analogously, denote the *interior dimension* of  $f$  by  $d_i = \dim_H \mathcal{A} = \dim_B \mathcal{A}$ . Then Lemma 15 can be restated as  $\dim_H \mathcal{C}_f = d_e/d_i$ ; we call this value the *contact dimension*.

Classic constructions of self-similar curves begin from a lattice path  $\Gamma_1$  that serves as a base motif and use the self-similar rules to iteratively generate exponentially longer lattice paths that converge to a smooth self-similar curve. A subsequent path  $\Gamma_n$  is defined from  $\Gamma_{n-1}$  by placing a copy of  $\Gamma_1$  at each node of  $\Gamma_{n-1}$ , suitably oriented so that the end of one copy of  $\Gamma_1$  can be connected to the beginning of the next copy of  $\Gamma_1$  by an edge on the sub-lattice. The number of nodes in the motif path specifies the number of self-similar copies – if  $\Gamma_1$  has  $N$  nodes then  $\Gamma_n$  has  $N^n$  nodes – and the edges specify the

ordering and orientation of the copies. In this way, the base motif  $\Gamma_1$  specifies an IFS, and the sequence of paths  $\{\Gamma_n\}_{n=1}^\infty$  converges to a continuous curve described by the IFS. For an example of this process, see Section 4 or (S44).

In particular, the self-similar parts of a motif-based curve tile a lattice with only finitely many choices of rotations and reflections. Consequently, when  $f$  is a motif-based curve,  $E_f$  can be mapped into  $M_f$  via a bounded number of steps; i.e. there is some  $K$  such that

$$E_f = \{p \in \partial\mathcal{U} \cap \mathcal{A} : \text{there exists } \omega \in \Omega_N^K \text{ such that } \Phi_\omega(p) \in M_f\}.$$

It follows that  $E_f$  is compact and therefore  $\dim_B E_f = \dim_H E_f = d_e$ .

With the same approach, we find that the contact dimension can also be measured using the box-counting dimension. If we examine the contact map away from the diagonal,  $\mathcal{C}_f^j := \{(s, t) \in \mathcal{C}_f : s - t > 1/N^j\}$ , we find from Lemma 15 that

$$\dim_B \mathcal{C}_f^j = \frac{\dim_B E_f}{\dim_B \mathcal{A}} = \frac{d_e}{d_i} \quad \text{for sufficiently large } j.$$

In the next section, we show that contact probability is effectively measuring  $\dim_B \mathcal{C}_f^j$  for large  $j$  and derive the contact probability scaling as a function of  $d_e/d_i$ .

## ii. Contact probability measures the contact map dimension

The contact probability of a curve measures the likelihood two points are in contact as a function of the distance along the curve between the points. Here we rigorously derive the contact probability scaling from the contact dimension.

Let  $f$  be a self-similar curve based on the length- $N$  motif path  $\Gamma_1$ , and let  $\{\Gamma_n\}_n$  be the iterative set of paths converging to  $f$ . For  $a = 0, \dots, N^n - 1$ , let  $\Gamma_n(a)$  denote the  $a$ th node of  $\Gamma_n$ . We say that  $\Gamma_n(a)$  and  $\Gamma_n(b)$  are in contact when they are adjacent on the lattice, and define the discrete contact map of  $\Gamma_n$  by

$$\mathcal{I}_n = \{(a, b) : 0 \leq a, b < N^n, \Gamma_n(a) \text{ and } \Gamma_n(b) \text{ are in contact}\}.$$

The contact map of  $\Gamma_n$  is a finite approximation to the infinite contact map  $\mathcal{C}_f$  whose dimension was characterized above. Specifically,  $(a, b) \in \mathcal{I}_n$  if and only if the square  $[a/N^n, (a+1)/N^n] \times [b/N^n, (b+1)/N^n]$  has non-empty intersection with  $\mathcal{C}_f$ . (See Proposition 18.)

Define the *contact incidence*  $I_n(k)$  to be the number of contact pairs in  $\Gamma_n$  at distance between  $N^{k-1}$  and  $N^k - 1$ , for  $k = 1, \dots, n$ . This is the numerator of the contact probability measurement. The denominator is the ‘‘possible’’ number of contacts at distance between  $N^{k-1}$  and  $N^k - 1$ . Since the curve has length  $N^n$ , the possible number of contacts at distance  $\ell$  is simply  $N^n - \ell - 1$ . Thus, contact probability, or  $P_n(k)$ , is given by the equation

$$P_n(k) = \frac{I_n(k)}{\sum_{\ell=N^{k-1}}^{N^k-1} N^n - \ell - 1}.$$

Contact incidence  $I_n(k)$  counts the number of points lying inside a diagonal strip of the contact map of  $\Gamma_n$ . By dividing this strip into self-similar parts, we show in Lemma 19 in the Appendix that contact probability effectively makes a particular box-counting measurement of the contact map. Consequently, we find,

$$I_n(k) \sim (N^k)^{d_e/d_i-1} \quad \text{for large } n.$$

Furthermore, it is clear that the denominator of  $P(k)$  clearly scales as  $N^k$ . Therefore,

$$P_n(k) \sim (N^k)^{d_e/d_i-2} \quad \text{for large } n.$$

We have proved that the contact probability for any motif-based curve obeys a power law with exponent equal to the contact dimension minus 2. That is, a plot of  $\{(k, \log_N P(k))\}$  approaches a straight line with slope  $\dim_B E_f / \dim_B \mathcal{A} - 2 = d_e/d_i - 2$  as  $n$  grows large.

This result is illustrated in Fig S3. We have constructed high iterations of numerous classic motif-based space-filling curves, and we find that our theory perfectly predicts the contact probability scaling measured from these paths (Table S3).

## iii. Appendix: Proofs

**Lemma 15.** *Let  $f$  be a balanced fractal curve with image  $\mathcal{A}$ , contact portrait  $\mathcal{C}_f \subset I^2$ , and multiple points  $M_f \subset \mathcal{A}$ . Define the map  $g : \mathcal{C}_f \rightarrow M_f$  by  $g : (s, t) \mapsto f(s) = f(t)$ . Then*

$$\begin{aligned} \dim_H g(X) &= \dim_H \mathcal{A} \cdot \dim_H X, \\ \dim_B g(X) &= \dim_B \mathcal{A} \cdot \dim_B X \end{aligned}$$

for any Borel set  $X \subset \mathcal{C}_f$ .

**Proof.** Let  $\pi$  denote the linear projection in  $\mathbb{R}^2$  onto the  $x$ -axis. Then  $g = f \circ \pi$ . Since  $\pi$  is naturally  $\alpha$ -Hölder with  $\alpha = 1$ ,  $\dim_H \pi(X) \leq \dim_H X$  and  $\dim_B \pi(X) \leq \dim_B X$  for all  $X \subset \mathcal{C}_f$ . Theorem 6 then implies that  $\dim_H g(X) \leq \dim_H \mathcal{A} \cdot \dim_H X$  and  $\dim_B g(X) \leq \dim_B \mathcal{A} \cdot \dim_B X$ .

The proofs of the reverse inequalities closely follow the proof of Theorem 6 with  $f$  replaced by  $g$ . In the proof of the Hausdorff dimension bound, the measure  $\mu$  should be defined on  $M_f$  by

$$\mu(A) = \mathcal{H}^s(g^{-1}(A) \cap X_0) \quad \forall A \subset M_f.$$

This is indeed a measure – clearly  $\mu(\emptyset) = 0$  and  $\mu(A) \leq \mu(B)$  when  $A \subset B$ , and  $\mu$  is countably additive since  $g^{-1}(A)$  and  $g^{-1}(B)$  are disjoint whenever  $A$  and  $B$  are disjoint.

The remainder of the proof follows in essentially the same manner as in Theorem 6. In the notation of this proof, since  $g^{-1}(A) = (f^{-1}(A) \times f^{-1}(A)) \cap \mathcal{C}_f$ , it follows that  $g^{-1} \circ \Phi_\omega(\mathcal{U}) \subset \sigma_\omega(I)^2$ . Hence, equation [9] and equation [11] remain almost unchanged. Since  $\sigma_\omega(I)^2$  is still a set with diameter at most  $\rho^d$ , equation [10] still holds. This shows that  $\dim_H g(X) \geq \dim_H \mathcal{A} \cdot \dim_H X$  and  $\dim_B g(X) \geq \dim_B \mathcal{A} \cdot \dim_B X$ , as desired.  $\square$

**Proposition 16.** *The set  $E_f$  is independent of the choice of open set  $\mathcal{U}$ .*

**Proof.** Let  $\mathcal{U}$  be any set for which  $\mathcal{F}$  satisfies the open set condition. Then  $\mathcal{A} \subset \mathcal{U}$ . If  $p$  satisfies the properties of an exterior point, then there exist  $\omega, \omega' \in \Omega_N$ , distinct and equal length, such that  $p \in \Phi_\omega(\mathcal{A}) \cap \Phi_{\omega'}(\mathcal{A})$ . Then  $\Phi_\omega(\mathcal{U})$  and  $\Phi_{\omega'}(\mathcal{U})$  are disjoint, so necessarily  $p \in \partial\mathcal{U}$ .  $\square$

**Proposition 17.** *If  $E_f$  is compact,  $\dim_B E_f = \dim_H E_f = \dim_H M_f$ .*

**Proof.** Suppose that  $f$  is described by the IFS  $\mathcal{F} = \{(\Phi_0, \rho_0), \dots, (\Phi_{N-1}, \rho_{N-1})\}$ . Notice that  $E_f$  is *sub-self-similar* (S50); that is,  $E_f$  is compact and satisfies

$$E_f \subseteq \bigcup_{i=0}^{N-1} \Phi_i(E_f).$$

Then Theorem 3.5 in (S50) implies that the Hausdorff and Box-counting dimensions of  $E_f$  coincide. Since  $M_f$  is a countable union of images of  $E_f$  under the maps  $\{\Phi_i\}$ ,  $\dim_H E_f = \dim_H M_f$ .  $\square$

**Proposition 18.** Let  $f$  be a fractal curve which is self-similar in  $N$  equal parts. Construct  $\Gamma_n$ , the  $n$ th finite approximation to the curve  $f$ , consisting of  $N^n$  points on a lattice. Let  $\mathcal{I}_n$  be the set of contact pairs in  $\Gamma_n$ ; namely,

$$\mathcal{I}_n = \{(a, b) : 0 \leq a, b < N^n, \Gamma_n(a) \text{ and } \Gamma_n(b) \text{ are in contact}\}.$$

Then  $(a, b) \in \mathcal{I}_n$  if and only if the square  $[a/N^n, (a+1)/N^n] \times [b/N^n, (b+1)/N^n]$  has non-empty intersection with  $\mathcal{C}_f$ .

**Proof.** Suppose that  $f$  is described by the IFS  $\{\Phi_0, \dots, \Phi_{N-1}\}$  in the image. Given integers  $a$  and  $b$  between 0 and  $N^n - 1$ , let the base- $N$  representations of  $a$  and  $b$  be given by

$$\begin{aligned} a &= \alpha_1 \dots \alpha_n \\ b &= \beta_1 \dots \beta_n \end{aligned}$$

Then  $(a, b) \in \mathcal{I}_n$  is equivalent to  $\Phi_{(\alpha_1, \dots, \alpha_n)}(\mathcal{A}) \cap \Phi_{(\beta_1, \dots, \beta_n)}(\mathcal{A}) \neq \emptyset$ , which is equivalent to the existence of  $(s, t) \in \mathcal{C}_f$  with  $a/N^n \leq s \leq (a+1)/N^n$  and  $b/N^n \leq t \leq (b+1)/N^n$ , as claimed.  $\square$

**Lemma 19.** Let  $f$  be a motif-based self-similar curve. Construct  $\Gamma_n$ , the  $n$ th finite approximation to  $f$ , and measure the contact incidence  $I_n(k)$ . For large  $n$ , there are constants  $\alpha, \beta$  such that

$$\alpha N^{(d_e/d_i-1)k} \leq I_n(k) \leq \beta N^{(d_e/d_i-1)k}$$

for large  $k$ .

**Proof.** Define  $\mathcal{C}_f^j = \{(s, t) \in \mathcal{C}_f : s - t > 1/N^j\}$ . Since  $f$  is motif-based, for some sufficiently large  $j_0$ ,  $\dim_B \mathcal{C}_f^{j_0} = d_e/d_i$ . By replacing the  $N$  self-similarities describing  $f$  with  $N^{j_0}$  iterated self-similarities  $\{\Phi_\omega : \omega \in \Omega_N \text{ has length } j_0\}$  which describe the same curve  $f$ , we may assume that  $\dim_B \mathcal{C}_f^1 = d_e/d_i$ . (In other words, replace the sequence of paths  $\{\Gamma_n\}_{n=1}^\infty$  with  $\{\Gamma_{j_0 * n}\}_{n=1}^\infty$ .)

Given some compact set  $X$  in the plane and  $k \in \mathbb{N}$ , we subdivide the plane into a grid of squares of side length  $N^{-k}$  with sides parallel to the  $x$ - and  $y$ -axes and the corner of one square at the origin. Let  $B_k(X)$  equal the number of grid squares with side length  $N^{-k}$  which intersect  $X$ . Consider  $\mathcal{I}_n$ , the finite set of contacts of  $\Gamma_n$ . The number of points in the set

$$\mathcal{I}_n^{n-k} := \{(a, b) \in \mathcal{I}_n : N^k \leq |a - b| < N^{k+1}\}$$

is exactly  $2 \cdot I_n(k)$ .

Set  $K := N^{n-k}$  and define  $2K - 1$  disjoint sets in  $\mathcal{I}_n^{n-k}$  as follows:

$$P_i := [(i-1)N^k, iN^k]^2 \cap \mathcal{I}_n^{n-k},$$

$$Q_i := ([iN^k, (i+1)N^k] \times [(i-1)N^k, iN^k]) \cap \mathcal{I}_n^{n-k},$$

where the  $P_i$  are defined for  $i = 1, \dots, K$  and the  $Q_i$  are defined for  $i = 1, \dots, K - 1$ . Fig S4C shows an example of  $\mathcal{I}_n^{n-1}$ ,  $\{P_i\}$ , and  $Q_1$  when  $f$  is the Hilbert curve.

By self-similarity of the contact pairs, the sets  $P_1, \dots, P_K$  are identical and equal to a scaled down copy of  $\mathcal{I}_k^1$ . Then by Proposition 18, the number of points in each  $P_i$  is exactly equal to  $B_k(\mathcal{C}_f^1)$ . Since  $P_1, \dots, P_K$  are disjoint and contained in  $\mathcal{I}_n^{n-k}$ ,

$$2 \cdot I_n(k) \geq \sum_{i=1}^K \#P_i = N^{n-k} \cdot B_k(\mathcal{C}_f^1).$$

Because  $f$  is motif-based, two sub-parts of the curve can only contact each other in finitely many different combinations. Specifically, define the contact map between consecutive

sub-parts

$$Z_f = \bigcup_{k=1}^{\infty} \bigcup_{j=1}^{N^k-1} \left\{ \phi_{k,j}((s, t)) \in \mathcal{C}_f^k : \frac{j}{N^k} \leq s \leq \frac{j+1}{N^k}, \frac{j-1}{N^k} \leq t \leq \frac{j}{N^k} \right\},$$

where  $\phi_{k,j}$  is chosen to map the sub-square  $[j/N^k, (j+1)/N^k] \times [(j-1)/N^k, j/N^k]$  back to the unit square. (So  $Z_f \subset [0, 1]^2$ .) Because consecutive sub-parts form contacts combinatorially in finitely many ways,  $Z_f$  can be written as a finite union over a subset of the sets above. Thus,  $Z_f$  itself has dimension at most  $d_e/d_i$ .

Again by Proposition 18, a point in  $Q_i$  corresponds to a box of side-length  $N^{-k}$  in the same location that intersects  $Z_f$ . Thus, the number of points in  $Q_i$  is at most  $B_k(Z_f)$ .

Now since  $\mathcal{I}_n^{n-k}$  is contained in the union of the  $P_i$  and the  $Q_i$ , counting points gives

$$\begin{aligned} 2 \cdot I_n(k) &= \sum_{i=1}^{N^{n-k}} \#P_i + 2 \cdot \sum_{j=1}^{N^{n-k}-1} \#Q_j \\ &\leq N^{n-k} \cdot B_k(\mathcal{C}_f^1) + 2(N^{n-k} - 1) \cdot B_k(Z_f), \end{aligned}$$

where  $\#P_i$  and  $\#Q_i$  are the number of points in  $P_i$  and  $Q_i$  respectively. Combining the inequalities above shows

$$\begin{aligned} 2 \cdot I_n(k) &\geq N^{n-k} \cdot B_k(\mathcal{C}_f^1) \\ 2 \cdot I_n(k) &\leq N^{n-k} \cdot B_k(\mathcal{C}_f^1) + 2(N^{n-k} - 1) \cdot B_k(Z_f). \end{aligned}$$

Since  $\mathcal{C}_f^1$  and  $Z_f$  both have box-counting dimension equal to  $d_e/d_i$ ,  $\log_N B_k(\mathcal{C}_f^1)$  and  $\log_N B_k(Z_f)$  each scale linearly as a function of  $k$  with slope  $d_e/d_i$ . Thus,  $\log_N I_n(k)$  scales with slope  $d_e/d_i - 1$  as a function of  $k$ .  $\square$

## e. Novel curves

### i. Construction of space-filling curves using tiling

The IFS-based construction of self-similar curves presented in Section 2 may be interpreted nicely in terms of an iterative geometric construction. In this section, we walk through a general process for constructing self-similar space-filling curves.

First, the region chosen to be filled by the curve is subdivided into  $n$  parts each equal to the whole, giving a self-similar tiling of the original shape, also known as a *rep-tiling*. Second, a Hamiltonian path is chosen which passes through each tile; this forms the *base motif*. Third, a rewrite rule is determined using this base motif. Specifically, each of the  $n$  tiles is partitioned in the same manner as the original shape, and the base motif is drawn in each tile in a suitable orientation so that the end of the base motif in the  $i$ th tile may be joined directly to the beginning of the base motif in the  $(i+1)$ th tile, where the ordering of the tiles is also determined by the base motif. By iteratively applying the rewrite rule, arbitrarily long paths through the region are constructed, and these paths converge to a self-similar curve that fills the chosen region.

The rep-tiling, base-motif, and rewrite rule for the Hilbert curve is shown in Fig S5A. The region is a square, and the tiling consists of four squares of half the size. A path through the four squares is chosen as the base motif. Finally, one copy of this motif is placed in each square, suitably oriented, to define the rewrite rule. This approach may be generalized to higher dimensions, for example, to construct the 3D Hilbert curve (Fig S3).

Notice that it is possible to construct many different self-similar curves that fill the same space; for example, the Hilbert and Peano curves both fill the square. By subdividing the square into more sub-squares and choosing different paths through the sub-squares to form the base motif, a combinatorially unlimited number of such curves may be constructed.

Until now, all curves we have discussed have been unknotted. By subdividing a cube into sufficiently many parts and choosing a knotted base-motif, we can construct a space-filling curve that has arbitrarily many knots as the path is repeatedly iterated. We illustrate this with a construction, dubbed the *Gordian knot*, which subdivides the cube into 64 parts and choosing a base-motif which forms two trefoil knots (if the ends are joined) (Fig S5D). If the endpoints are joined along the outside to form a loop, the  $n$ th iteration contains  $\sum_{i=0}^{n-1} 1664^i$  trefoil knots. Notably, the contact probability is unaffected by the knotted nature of this curve, as predicted by our theory (Fig S3).

It is possible to construct self-similar space-filling curves using tiles that overlap. The Levy Dragon is such an example: it has dimension equal to 2 and is self-crossing. Interestingly, although our theoretical results only apply to curves that are not self-crossing (as required by the open set condition), the Levy Dragon contact probability exponent satisfies the predictions of the theorem (Fig S3). Thus, there may be a generalization of our results for self-crossing curves.

## ii. Rough-boundaried space-filling curves

By choosing an irregular region, a space-filling curve with a rough boundary may be constructed. However, the region must be chosen appropriately so that it self-interlocks and tiles space. In a general method, we generate a *reciprocal tessellation* by taking a simple tiling, such as the square tiling of the plane, and modifying the underlying tile by adding a bump to one side and a corresponding cavity on the other side (Fig S5B). This operation can be performed repeatedly, creating tiles with rougher boundaries that look nothing like squares.

We illustrate this approach in two- and three-dimensions. First, we create a very simple reciprocal tessellation by translating a single sub-square in a square tiling from the bottom of the tile to the top, and doing the same for a sub-square from left-to-right (Fig S5B). We then construct a Hamiltonian Path through this tile. However, we immediately face a hurdle: it turns out that there is no way to iterate this Hamiltonian path recursively, since the 2D rotational symmetry of the tile is destroyed by the change in tile shape. As a result, it is not possible to connect our Jigsaw motif to construct a motif-of-motifs. However, it is possible to compensate for this symmetry-breaking by constructing a second motif (Fig S5B). By using one or the other motif, it is possible to iterate this construction indefinitely as before. This yields a Peano curve whose boundary has a fractal dimension equal to  $\log 12 / \log 8 = 1.195$ , and which exhibits the expected shift in scaling (Fig S3). The term “Jigsaw curve” is suggested by the shape of the resulting curve.

This technique may also be applied successfully in three dimensions to create the 3D Jigsaw curve. It has concavities and convexities on opposite faces, just like the jigsaw curve does on opposite sides. The tiling pattern ensures the boundary will be rough.

The base motif lattice is a 666 lattice with all six faces possessing either convexities or concavities (Fig S5C, second row). The three convex faces meet at a single vertex (the central vertex) and have their center four points replicated one unit outward, and the opposite faces, which are concave, meet at

the opposite vertex (the anti-central vertex) and have their center four points deleted.

As before, because this shape is not fully rotationally symmetric, we require multiple base motifs. Specifically, there are twenty four base motif Hamiltonian paths, each of which begin at one of the eight corners and end at of the corresponding three adjacent corners. These may be specified by only three archetypal base motifs:

- Type 1 (Fig S5C, top left): All six Hamiltonian paths which either begin or end at the central vertex. They are symmetric via rotations and path reversals.
- Type 2 (Fig S5C, top middle): All six Hamiltonian paths that begin or end at anti-central vertex. They are symmetric via rotations and path reversals.
- Type 3 (Fig S5C, top right): All twelve Hamiltonian paths which are neither Type 1 nor Type 2.

Using these base motifs, a rewrite rule can be defined, as shown in Fig S5C.

Mathematically, the dimension of the surface of the 3D Jigsaw curve is  $\log 44 / \log 6 \approx 2.1120$ . We computed the contact probability for the third iteration of the 3D Jigsaw curve possessing 10,077,696 monomers and confirmed the  $\gamma$  value predicted by our theory (Fig S3). As expected, the contact probability scaling is robust in the presence of fractal boundaries in three-dimensional space.

In the following section, reciprocal tessellations are applied to construct a family of curves in two dimensions with arbitrarily rough surfaces. For these constructions, we are able to use a single base-motif by choosing the tessellations to be rotationally symmetric.

## iii. Inside-Out Hilbert curves

The Hilbert Curve (S51) is the limit in the plane of a sequence of self-avoiding approximation paths  $H^n$  (Fig S6, Row A) as  $n \rightarrow \infty$ . For  $n > 0$  each path  $H^n$  is the composition  $H^1 \circ H^{n-1}$ , where  $H^1 = H$  is called the curve’s *motif*. The motif specifies where to place suitably oriented and connected copies of the previous approximation path to build the next approximation. When the unit square  $S$  is subdivided into a  $2^n \times 2^n$  array of subsquares, path  $H^n$  passes through every subsquare (of side  $1/2^n$ ) in  $S$ . In the limit, the self-similar, space-filling Hilbert Curve  $H^{n \rightarrow \infty}$  has infinite length, is continuous, and reaches every point inside a two-dimensional unit square. The curve is fractal, but its filled area’s square boundary—with dimension  $D = 1$  and length 4—is not.

Many space-filling curves in the plane have boundaries with fractal dimension  $D > 1$ ; for example the Dragon Curve has a boundary dimension  $D = 1.5236+$ . Can we construct a planar space-filling curve whose boundary’s fractal dimension is arbitrarily close to 2? The answer is *yes*.

To construct motifs  $M_n$  for a sequence  $C_n$  of self-similar space-filling curves, each having a boundary with fractal dimension  $D_n > D_{n-1}$  where  $D_{n \rightarrow \infty} = 2$ , we can turn the Hilbert Curve construction upon itself, as shown in Fig S6:

- I. [Row A]. Choose an  $n \geq 0$  and consider the Hilbert Curve approximation path  $H^n$  (e.g., for  $n = 2$  consider the central column of Fig S6, starting at the top, where  $H^2$  is circled).
- II. [Row B]. Subdivide the unit square  $S$  into  $(8 \cdot 2^n) \times (8 \cdot 2^n)$  subsquares. Call the lower left subsquare the *start* and the lower right subsquare the *end* (marked with dots). Along each of the four sides of subdivided  $S$ , use two copies of suitably scaled path  $H^n$  from Row A as a boundary “mold” by which  $4 \times 4$  groups of subsquares are rearranged so as to extrude one half-side outward, and the other half-side inward (circled along the top for  $n = 2$ ). The resulting shape,

called a *prototile*, has rotational (**p4**) wallpaper symmetry. The subsquare count necessarily remains the same, so each prototile, regardless of  $n$ , also has unit area.

III. [Rows C–F]. Construct a Hamiltonian path that visits all  $64 \times 2^{2n}$  subsquares in the prototile from *start* to *end*, using the following algorithm:

- [Row C] Beginning at *start*, follow the left-hand rule (shown in purple) along the inside of the prototile’s boundary until the path hits the subsquare two subsquares above *end*.
- [Row D] Make a U-turn, then follow the right-hand rule back through unvisited subsquares until the path returns (as it must) to the subsquare directly to the right of *start*. Just under 3/4 of all the prototile’s subsquares have now been visited.
- [Row E] Treat  $2 \times 2$  groups of the remaining subsquares as super-subsquares (in green). Beginning to the right of *start*, construct a partial path  $P$  (in red) visiting these super-subsquares by following the right-hand rule until the path becomes adjacent to the central hub (four super-subsquares) of the prototile. Then change to the left-hand rule to include the hub, then change back to the right-hand rule upon leaving the hub. Continue until path  $P$  ends at the center of the super-subsquare whose lower right subsquare is *end*.
- [Row F] Construct  $P \circ H$ . In other words, “Hilbertize” partial path  $P$  by placing an  $H$  motif into each super-subsquare, suitably oriented to permit the sequence of  $H$ s to be connected to form the final portion of the complete path from *start* to *end*.

The final constructed path is a self-avoiding motif  $M_n^1$  for a space-filling curve whose approximation paths are also self-avoiding.  $M_n^2$  is recursively composed of  $64 \cdot 2^{2n}$  copies of  $M_n^1$  scaled by  $1/(8 \cdot 2^n)$ , suitably oriented and connected according to the sequence of subsquares that  $M_n^1$  specifies. Hence the limiting curve  $C_n (= M_n^\infty)$  has a boundary with fractal dimension parameterized by  $n$ , as determined by the usual (edge substitution) Hausdorff formula

$$D_n = \frac{\log L_n}{\log(1/r_n)},$$

where  $L_n$  is the extended-inward-and-outward edge-length of one side of  $S$ , measured in subsquare widths, and  $r_n$  is the similarity ratio (scaling factor) used to determine subsquare size. So we have

$$D_n = \frac{\log(8 \cdot 2^{2n})}{\log(8 \cdot 2^n)} = \frac{3 + 2n}{3 + n} \rightarrow 2, \quad \text{as } n \rightarrow \infty.$$

The increasing boundary dimensions of the first few of these meta-Hilbert curves are:

$$\begin{aligned} D_0 &= \frac{3}{3} = 1 \\ D_1 &= \frac{5}{4} = 1.25 \\ D_2 &= \frac{7}{5} = 1.4 \\ D_3 &= \frac{9}{6} = 1.5 \\ D_4 &= \frac{11}{7} = 1.5714 \\ D_5 &= \frac{13}{8} = 1.625 \\ &\dots \end{aligned}$$

Notice that boundary dimension  $D_4$  slightly exceeds that of the Dragon Curve.

The area  $A_n$  of each space-filling curve  $C_n$  plainly (by symmetry) equals 1. But as  $n$  increases, this area, while remaining connected, becomes increasingly rarified as it is distributed in fractal tendrils throughout either side of a set of infinitely “fractalized” Hilbert approximation paths. In the limit, as  $n \rightarrow \infty$ , all tendril widths—and gaps between them—go to 0 so that the interior of  $C_\infty$  in some sense vanishes just as its boundary becomes space-filling, creating a new rotationally symmetric tiling region whose area is now not 1, but 2. The fractal fuzz that makes up the high-dimensional boundary collapses, leaving just a collection of standard Hilbert Curves, piecewise connected end-to-end, all with their usual linear boundaries. The first six cover the upper 3/4 of the limit set  $C_\infty$ . The second six travel backwards, covering the exact same areas as the first six, but in opposite order and direction. (Like all space-filling curves, each Hilbert Curve is surjective, so here we have a sort of doubly surjective covering.) The final two Hilbert Curves cover the remaining 1/4 of the area along the bottom (Row E of Fig S6). A moving point that maps the unit interval to  $C_\infty$  covers these last two Hilbert Curves at half the instantaneous velocity it would cover the previous twelve Hilbert Curves. Hence  $C_\infty$  unexpectedly comprises just fourteen half-size Hilbert Curves.

The meta-motif construction technique described here works with any square-filling, generalized Hilbert Curve whose motif is a so-called *Greek key tour* (see Sloane’s integer sequence A000532).

Because each  $C_n$  is a planar tiling region exhibiting **p4** symmetry, and because each can be piecewise-connected in exactly the same places in a square array that self-similar sub-Hilbert Curves in a Hilbert Curve would be connected, one can create generally square, space-filled tiling regions having fractal boundaries whose dimension can be tuned—in theory, if not in practice—arbitrarily close to 2. (The number of prototile subsquares just a motif path must visit for  $D_{297} = 1.99$  is enormous:  $64 \times 2^{2 \cdot 297} = 2^{600}$ .)

When generalized to three dimensions, a composite approximation path of this type might model a densely packed polymer bundle that exhibits a fuzzy external boundary at the same time as its interior evinces multiple self-similar regimes at different scales. However, no explicit three-dimensional analog currently exists.

- S1. Li H and Durbin R (2010) Fast and accurate long-read alignment with Burrows-Wheeler Transform. *Bioinformatics*, 26, 589–595.
- S2. Knight P and Ruiz D (2012) A fast algorithm for matrix balancing. *IMA J of Numer Anal*, 35.
- S3. Beliveau, B et al. (2012) Versatile design and synthesis platform for visualizing genomes with Oligopaint FISH probes. *Proc Natl Acad Sci USA*, 109:21301-21306.
- S4. Grant CE, Bailey TL, Noble WS (2011) FIMO: scanning for occurrences of a given motif. *Bioinformatics* 27(7):1017-1018.
- S5. Kim TH et al. (2007) Analysis of the vertebrate insulator protein CTCF-binding sites in the human genome. *Cell* 128(6):1231-1245.
- S6. Schmidt D, et al. (2012) Waves of Retrotransposon Expansion Remodel Genome Organization and CTCF Binding in Multiple Mammalian Lineages. *Cell* 148, 335-348.
- S7. Doench JG, et al. (2014) Rational design of highly active sgRNAs for CRISPR-Cas9-mediated gene inactivation. *Nat Biotechnol* 32(12): 1262-1267.
- S8. Hsu PD, et al. (2013) DNA targeting specificity of RNA-guided Cas9 nucleases. *Nat Biotechnol* 31(9):827-832.
- S9. Ran FA, et al. (2013) Genome engineering using the CRISPR-Cas9 system. *Nat Protoc* 8(11):2281-2308.
- S10. Chu V, et al. (2015) Increasing the efficiency of homology-directed repair for CRISPR-Cas9-induced precise gene editing in mammalian cells. *Nat Biotechnol* 33(5):543-548.
- S11. Maruyama T, et al. (2015) Increasing the efficiency of precise genome editing with CRISPR-Cas9 by inhibition of nonhomologous end joining. *Nat Biotechnol* 33(5):538-542.
- S12. Rubinstein M, Colby RH (2003) *Polymer Physics* (Oxford University Press).
- S13. Dekker J, Rippe K, Dekker M, Kleckner N (2002) Capturing Chromosome Conformation. *Science* 295, 1306-1311.
- S14. Bystricky K, Heun P, Gehlen L, Langowski J, Gasser SM (2004) Long-range compaction and flexibility of interphase chromatin in budding yeast analyzed by high-resolution imaging techniques. *Proc Natl Acad Sci USA* 101, 16495716500.
- S15. Schiessel H (2003) The physics of chromatin. *J Phys Condens Matter* 15, R699-R774.
- S16. Aumann F, Lankas F, Caudron M, Langowski J (2006) Monte Carlo simulation of chromatin stretching. *Phys Rev E* 73, 041927.
- S17. Langowski, J (2006) Polymer chain models of DNA and chromatin. *Euro Phys J E* 19, 241-249.
- S18. Fussner E, Ching R, Bazett-Jones D (2011) Living without 30nm chromatin fibers. *Trends in Biochem Sci* 36, 176.
- S19. Fussner E et al. (2012) Open and closed domains in the mouse genome are configured as 10-nm chromatin fibres. *EMBO Rep* 13, 9927996.
- S20. Joti Y et al. (2012) Chromosomes without a 30-nm chromatin fiber. *Nucleus* 3, 404-410.
- S21. Schram R, Barkema G, Schiessel H (2013) On the stability of fractal globules. *J Chem Phys* 138, 224901.
- S22. Goldman MA (1988) The chromatin domain as a unit of gene regulation. *Bioessays* 9, 507-55.
- S23. Bulger M, Groudine M (1999) Looping versus linking: toward a model for long-distance gene activation. *Genes & development* 13(19), 2465-2477.
- S24. Naumova N et al. (2013) Organization of the mitotic chromosome. *Science* 342, 9487953.
- S25. Bohn M, Heermann D (2010) Diffusion-driven looping provides a consistent framework for chromatin organization. *PLoS One* 5, e12218.
- S26. Barbieri M et al. (2012) Complexity of chromatin folding is captured by the strings and binders switch model. *Proc Natl Acad Sci USA* 109, 16173716178.
- S27. Le TBK, et al. (2013) High-resolution mapping of the spatial organization of a bacterial chromosome. *Science* 342: 731-734.
- S28. Kalhor R et al. (2012) Genome architectures revealed by tethered chromosome conformation capture and population-based modeling. *Nat Biotechnol* 30(1):90-98.
- S29. Giorgetti L et al. (2014) Predictive polymer modeling reveals coupled fluctuations in chromosome conformation and transcription. *Cell* 157.4:950-963.
- S30. Humphrey W, Dalke A, Schulten K (1996) VMD: visual molecular dynamics. *J Mol Graph* 14, 33738.
- S31. Halperin A, Goldbart P (1999) Early Stages of Homopolymer Collapse. *Phys Rev E* 61(1): 565.
- S32. Frisch T, Verga A (2002) Slow relaxation and solvent effects in the collapse of a polymer. *Phys Rev E* 66.
- S33. Clark D, Kimura T (1990) Electrostatic mechanism of chromatin folding. *J Mol Bio* 211, 883896.
- S34. Cui Y, Bustamante C (2000) Pulling a single chromatin fiber reveals the forces that maintain its higher-order structure. *Proc Natl Acad Sci USA* 97, 127-132.
- S35. Luger K, Hansen J (2005) Nucleosome and chromatin fiber dynamics. *Current Opinion in Structural Biology* 15, 188-196.
- S36. Chodaparambil et al. (2007) A charged and contoured surface on the nucleosome regulates chromatin compaction. *Nat Struc Mol Bio* 14(11):1105-1107.
- S37. ENCODE Project Consortium (2012). An integrated encyclopedia of DNA elements in the human genome. *Nature* 489, 57774.
- S38. Marsden M, Laemmli U (1979) Metaphase chromosome structure: Evidence for a radial loop model. *Cell* 17, 849-858.
- S39. Berg B, Foerster D (1981) Random paths and random surfaces on a digital computer. *Phys Lett B* 106(4): 323-326.
- S40. Aragao de Carvalho C, Caracciolo S (1983) A new Monte-Carlo approach to the critical properties of self-avoiding random walks. *J de Phys* 44, 323-331.
- S41. van Rensburg EJJ, Whittington SG (1991) The BFACF algorithm and knotted polygons. *J Phys A: Math Gen* 24, 5553.
- S42. Dodd IB, Sneppen K (2011) Barriers and silencers: a theoretical toolkit for control and containment of nucleosome-based epigenetic states. *J Mol Bio* 414, 624-637.
- S43. Falconer K (2003) *Fractal geometry: mathematical foundations and applications* (Wiley).
- S44. Barnsley MF (1993) *Fractals Everywhere*, 2nd ed. Academic Press Professional.
- S45. Hutchinson J (1981) Fractals and self similarity. *Indiana Univ Math J* 30(5):713-747.
- S46. Blumenthal R, Gettoor R (1961) Sample functions of stochastic processes with stationary independent increments. *J Math and Mech* 10, 493-516.
- S47. Khoshnevisan D, Xiao Y (2005) Levy Processes: capacity and Hausdorff dimension. *The Annals of Probability* 33(3):841-878.
- S48. Mattila P (1995) *Geometry of Sets and Measures in Euclidean Spaces: Fractals and Rectifiability*. Cambridge University Press.
- S49. Moran M (1999) Dynamical boundary of a self-similar set. *Fundamenta Mathematicae* 160(1).
- S50. Falconer K (1995) Sub-Self-Similar Sets. *Trans Amer Math Soc* 347(8):3121-3129.
- S51. Hilbert D (1891) Uber die stetige abbildung einer linie auf ein flachenstuck. *Mathematische Annalen* 38, 459-460.



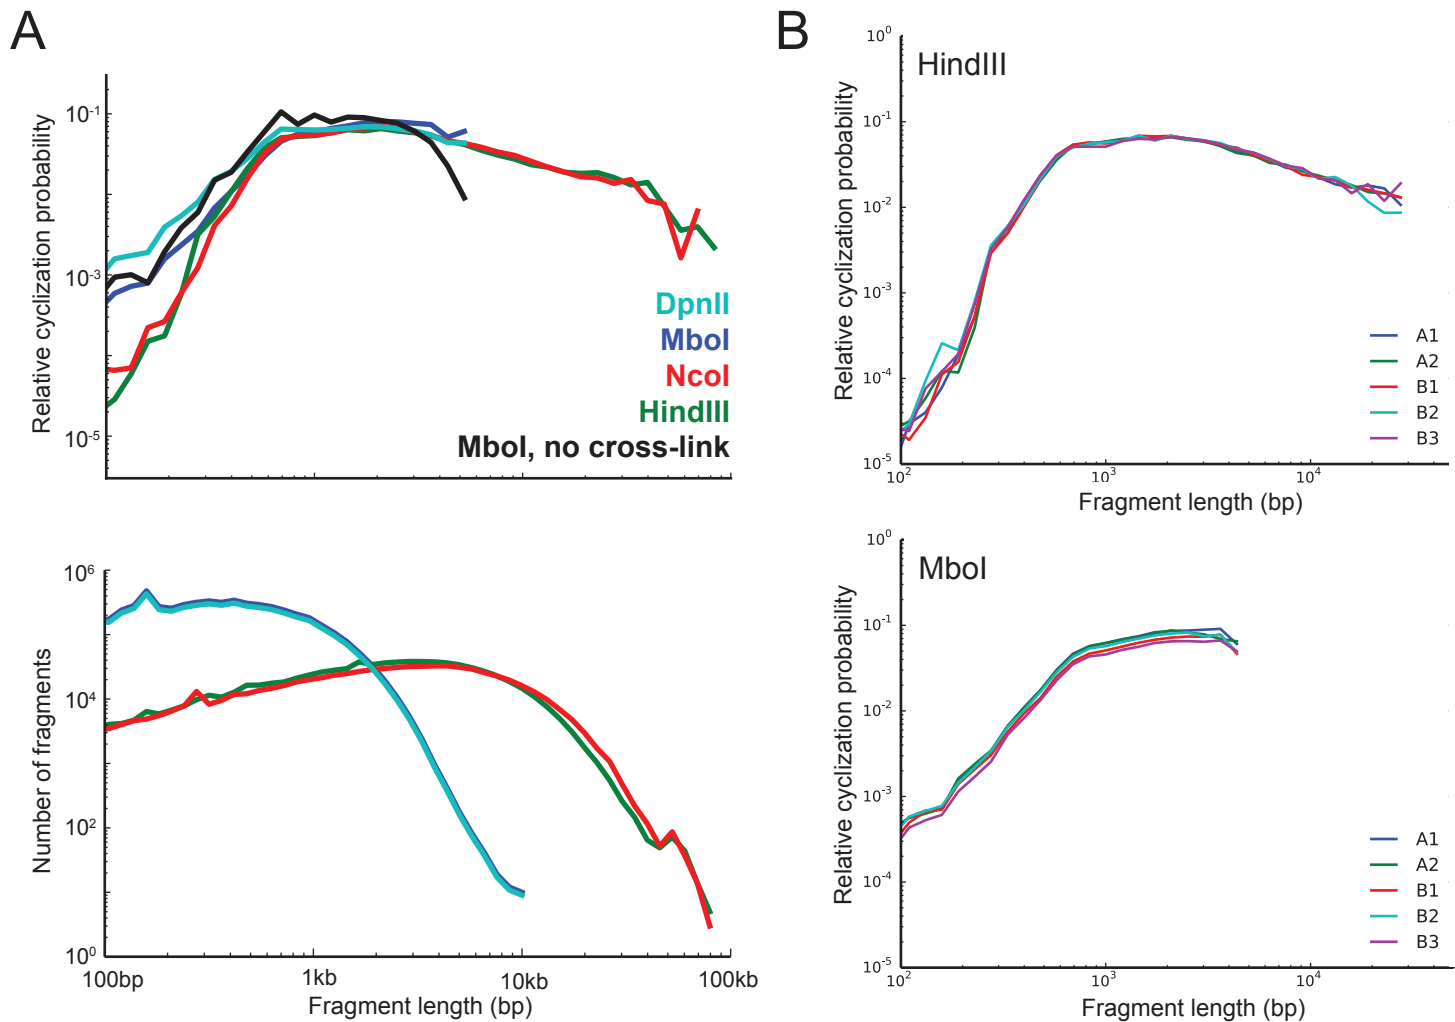

**Fig. S1. Additional flexibility measurements**

(A) *Above*: cyclization probability measured from a native Hi-C library in which no cross-linking was performed (8) was also consistent with cyclization measurements shown in Fig 1B. *Below*: distribution of restriction fragment lengths when the human genome is cut with DpnII (restriction site: GATC), MboI (GATC), NcoI (CCATGG), or HindIII (AAGCTT). (B) Flexibility measurements are consistent across the five nuclear compartments A1/A2, corresponding to active chromatin, and B1/B2/B3 corresponding to repressed chromatin (8). Relative cyclization probability within each compartment was plotted for Hi-C experiments using HindIII (top) and MboI (bottom) restriction enzymes.

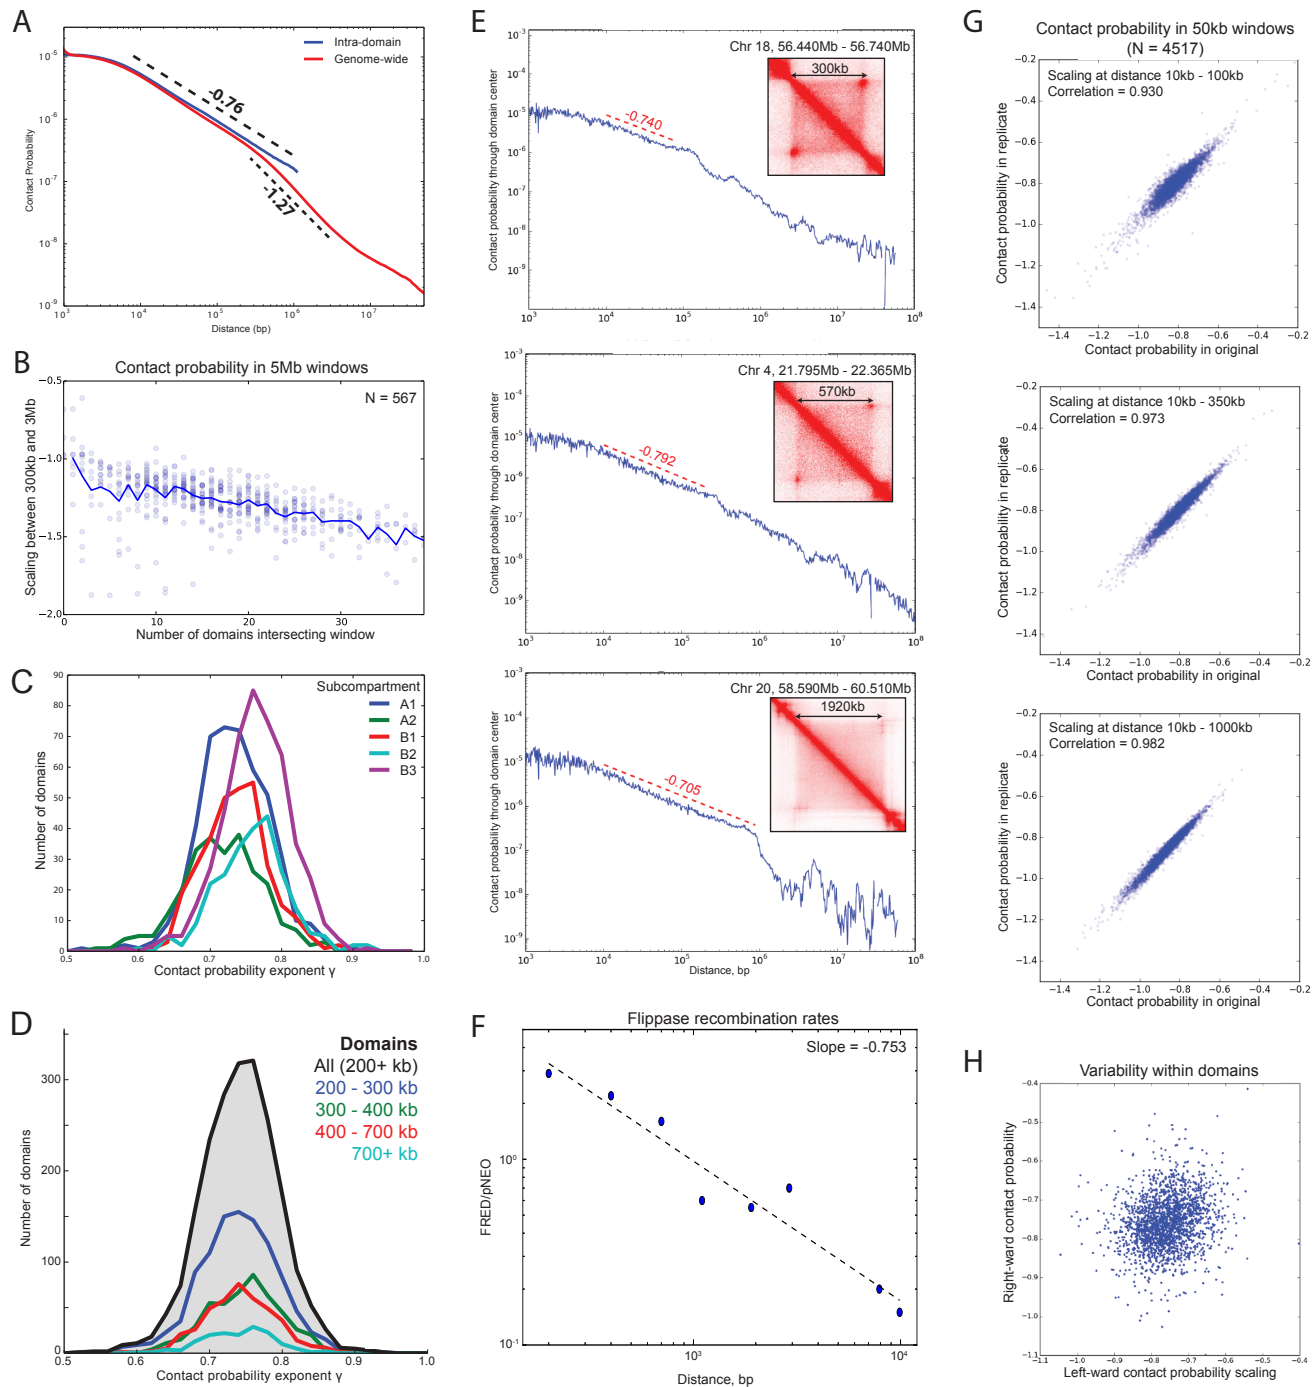

**Fig. S2. Contact probability of in situ Hi-C maps.**

(A) Contact probability of the primary Hi-C map (GM12878). Contact probability aggregated over intra-domain contacts (blue) exhibits a power law with  $\gamma = 0.76$  between 10kb and 1Mb. Contact probability is aggregated over all contacts genome wide (red) has a scaling with  $\gamma = 1.27$  between 300kb and 3Mb. (B) Power law exponents between 300kb and 3Mb for contact probability measured at 567 5Mb regions tiling the genome. Regions containing many domains exhibit steeper contact probability decay. (C) Histogram of domain contact probability scalings in GM12878 sorted by nuclear subcompartment. (D) Histogram of  $\gamma$  values observed inside 1057 high-confidence domains larger than 200kb throughout the genome. Average value is  $-0.75$ , standard deviation is 0.05. The value of  $\gamma$  does not depend on domain size. (E) Contact probability of a 50kb window through the center of three different domains. A power law with  $\gamma \sim 0.75$  extends to the domain boundary, independent of domain size. Contacts often drop sharply at the domain boundary. (F) Measurements of Flippase recombination rates also exhibit a scaling around  $-0.75$ . Data is from (18), Figure 7C. Note that (S42) comments in passing about the presence of a power law scaling in this data, but does not provide further details. (G) Local contact probability scalings, measured on 50kb windows in three distance ranges (10-100kb, 10-350kb, 10-1000kb), are strongly correlated between replicates. (H) Left-ward and right-ward contact probability scalings in adjacent, non-overlapping windows at the center of domains are uncorrelated.

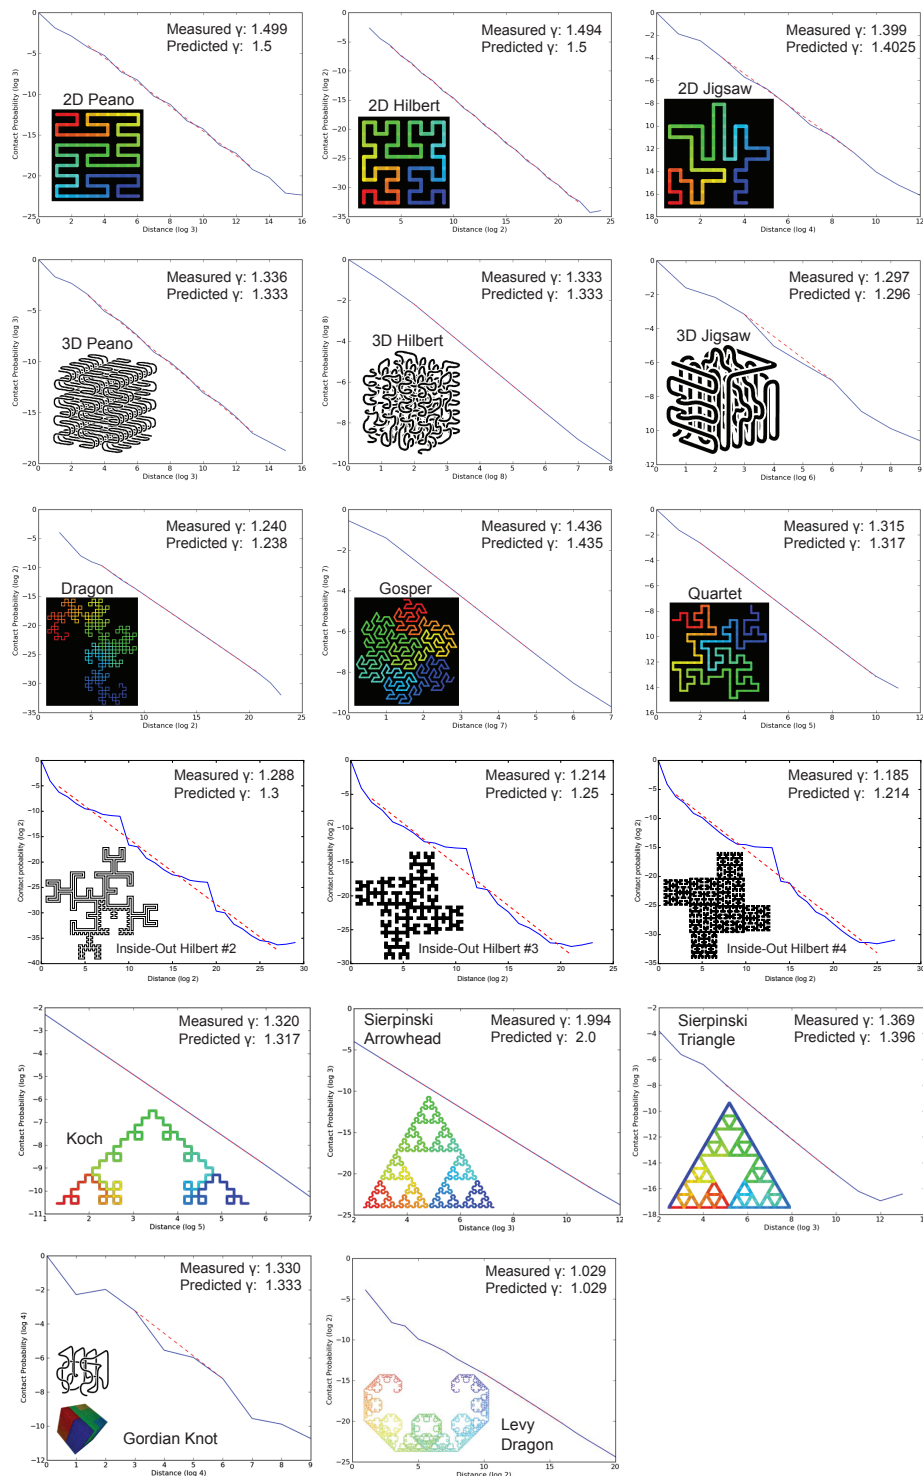

**Fig. S3. Contact probability for seventeen self-similar curves, comparing measured  $\gamma$  to values predicted by our theory.**

Contact probability plots. Each curve was iterated highly, often containing millions of segments. Left to right, top to bottom: 2D Peano curve, 2D Hilbert curve, 2D Jigsaw curve; 3D Peano curve, 3D Hilbert curve, 3D Jigsaw curve; Dragon curve, Gosper curve, Quartet curve; Inside-Out Hilbert #2, Inside-Out Hilbert #3, Inside-Out Hilbert #4; Koch curve, Sierpinski Arrowhead curve, Sierpinski triangle curve; 3D Gordian Knot, Levy Dragon.

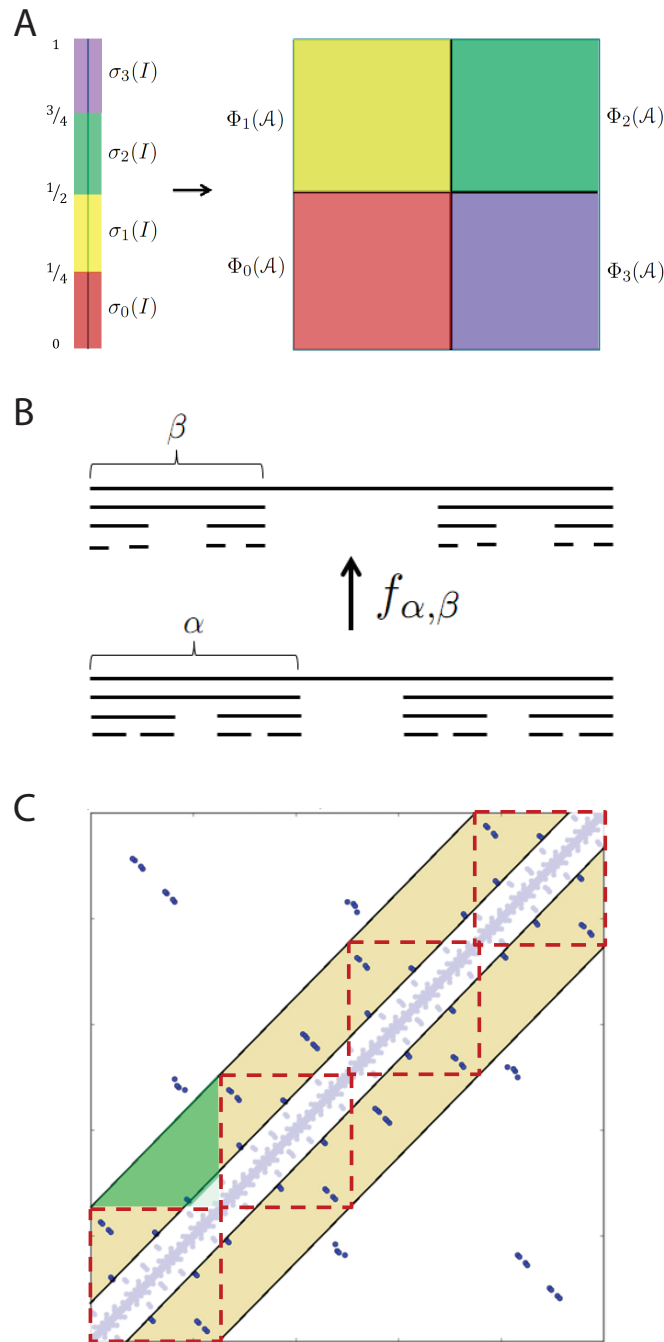

**Fig. S4. Construction of the Hilbert curve using an iterated function system.**

(A) Subdivide the unit interval  $I = [0, 1]$  into four equal parts. The interval  $\sigma_i(I)$  is mapped to the square  $\Phi_i(A)$  under the Hilbert curve. In general, by choosing different  $\{\sigma_i\}$  and  $\{\Phi_i\}$ , many different self-similar curves can be defined. (B) The homeomorphism  $f_{\alpha, \beta}$  maps the Cantor set with ratio  $\alpha$  to the Cantor set with ratio  $\beta$ , though the two sets have different dimension. For this reason, the condition that a self-similar curve is balanced is necessary for the uniform dimension scaling result to hold. (C) Contact map of the Hilbert curve. In the notation of the proof of Lemma 3.5:  $J_n^{n-1}$  is highlighted in yellow, the sets  $P_1, \dots, P_4$  are outlined by the dotted red squares, and the set  $Q_1$  is highlighted in green.

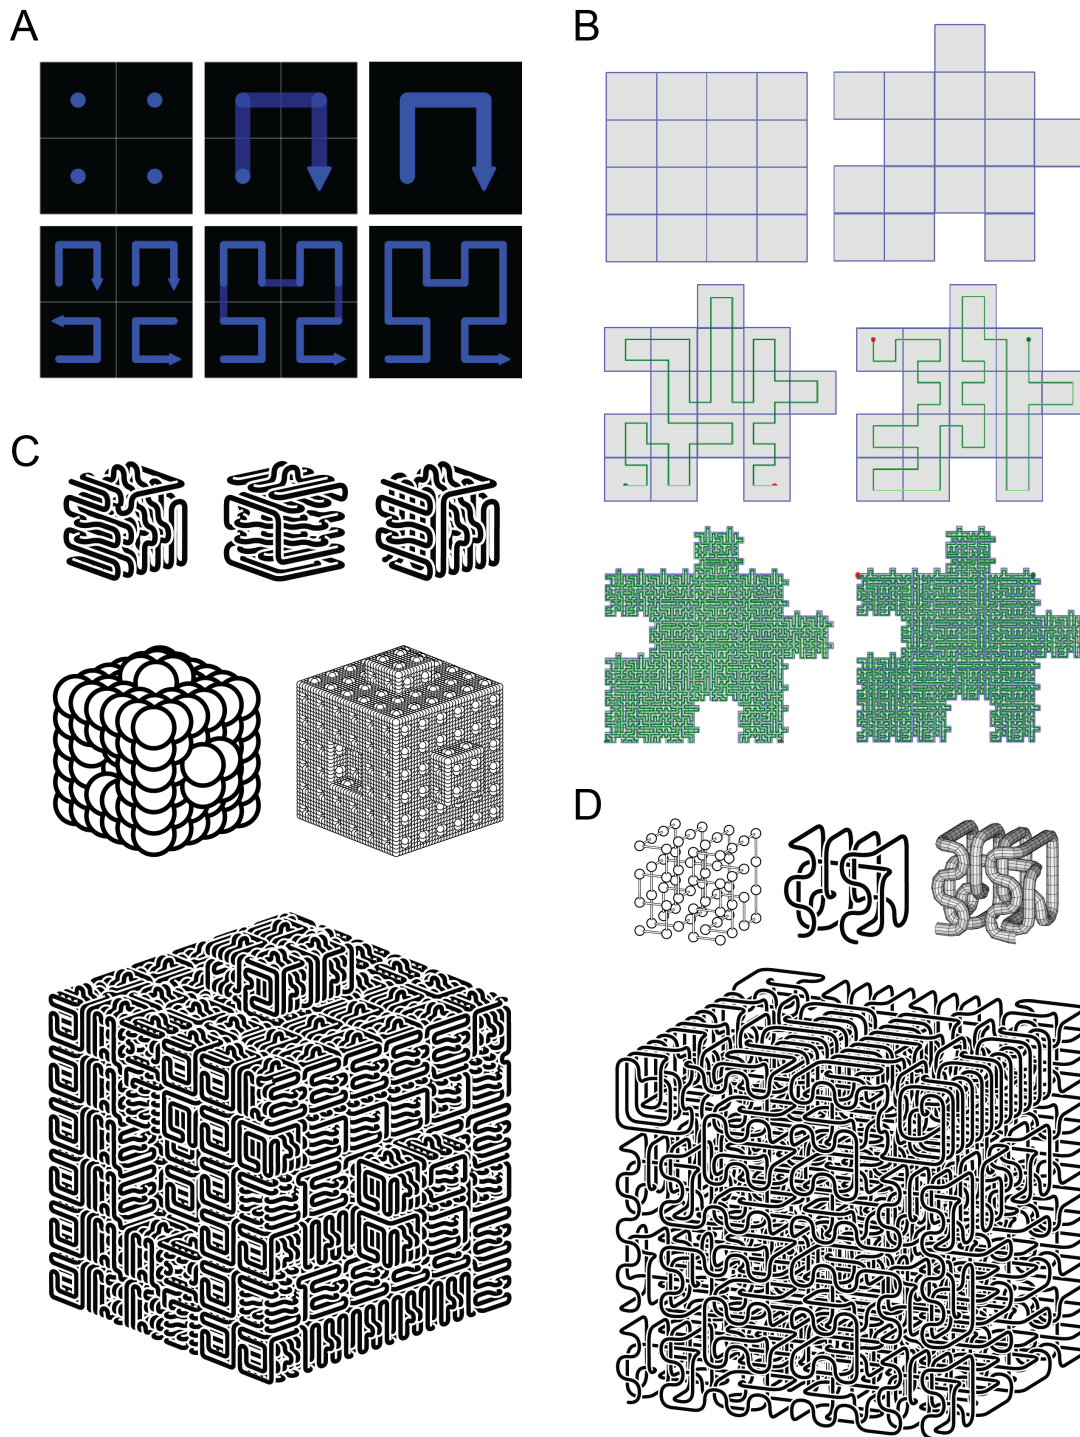

**Fig. S5. Motif-based constructions of space-filling curves through rep-tiling.**

(A) Construction of the Hilbert curve. *Top*: The square is divided into four sub-tiles equal to the whole, and a Hamiltonian path is chosen through them. *Bottom*: one suitably-oriented copy of the base motif is drawn in each sub-tile and the end of one motif is connected to the beginning of the next. This defines a rewrite rule which can be iteratively applied to construct arbitrarily long paths. (B) *Top*: A simple reciprocal tessellation in which subsquares are moved from one side to the other, creating interlocking tiles. *Middle*: motifs for the 2D Jigsaw curve. Two motifs are required to compensate for the lost symmetry in the tile; by combining the two motifs, it is possible to iterate indefinitely. *Bottom*: second iteration; two different curves result depending on which motif is chosen initially. The start of each path is indicated by a green dot and the end by a red dot. (C) A 3D space-filling curve with three indentations, the 3D Jigsaw curve. This is the first example of a 3D space-filling curve with rough boundary – the surface dimension is 2.112. *Top*: three archetypal base-motifs. *Middle*: the first and second iterations drawn in a sphere-filling representation. *Bottom*: the second iteration, illustrating the rewrite rule. (D) A 3D space-filling curve, dubbed the “Gordian Knot”, whose base-motif (shown above in three representations) contains a knot when the endpoints are joined. Higher iterations of the curve (second iteration shown below) contain arbitrarily many trefoil knots.

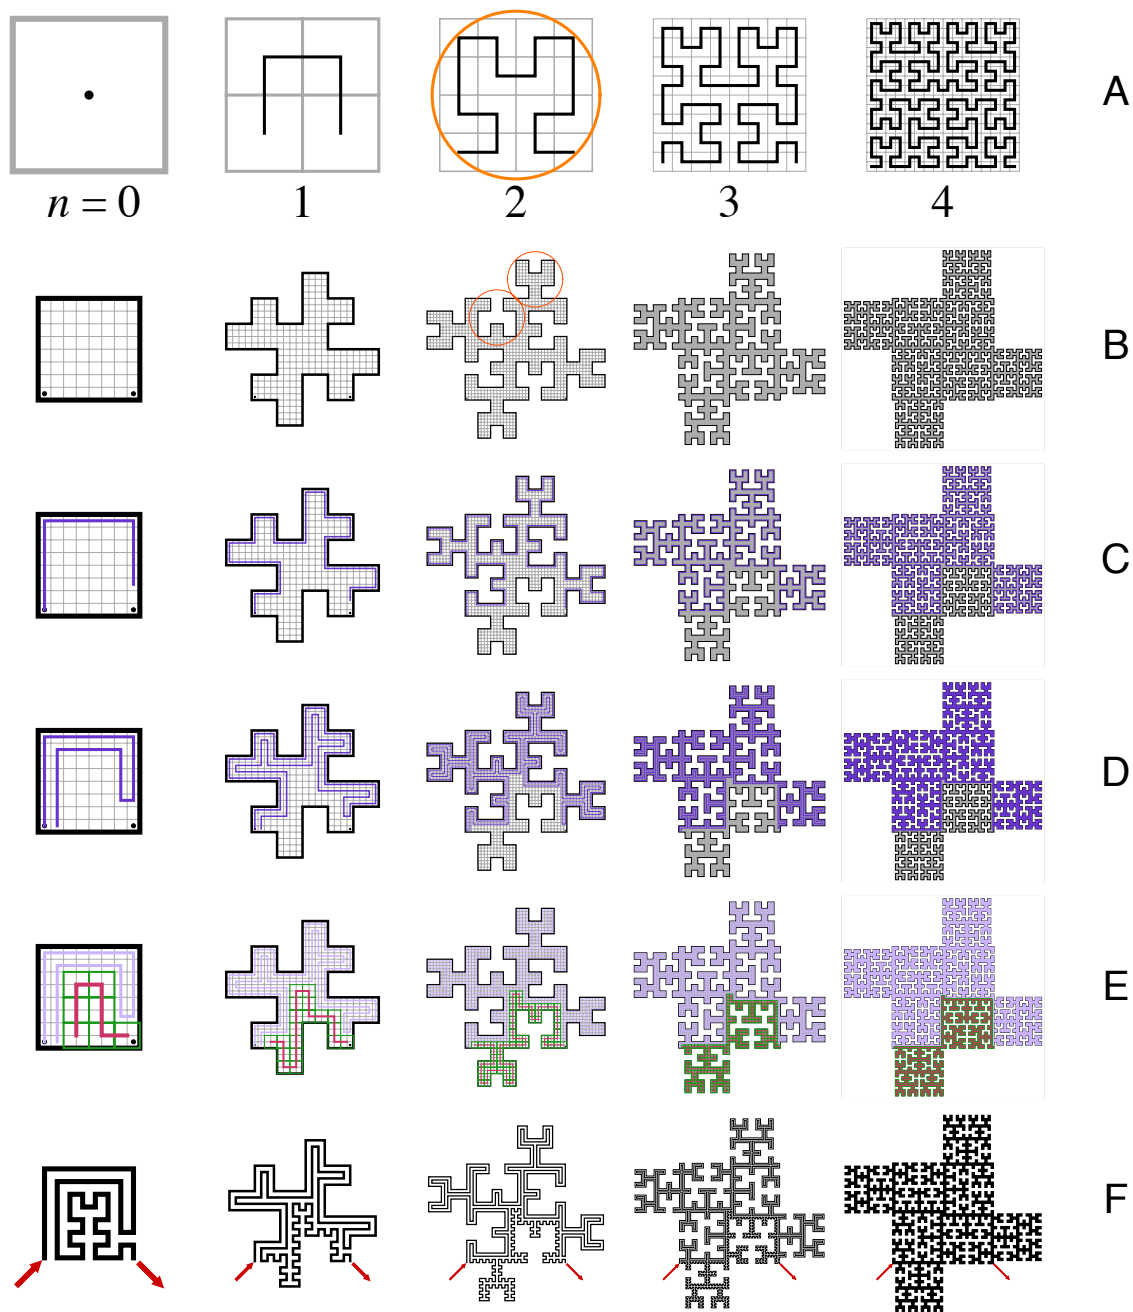

**Fig. S6. Construction of the Inside-Out Hilbert Curve.**

Each space-filling curve constructed this way has unit area, but the dimension of the resulting tile's border can be made arbitrarily close to 2.0, depending on which approximation path to the Hilbert Curve is used to build the prototile. **(Row A)** Pick a value of  $n$  and take the  $n$ th Hilbert Curve path. **(Row B)** Subdivide a unit square and mark the lower left and lower right subsquares as start and end points respectively. Along each side of the square, use two copies of the chosen Hilbert path to mold the square so that one half-side extrudes outwards and the other half-side is carved inwards. The resulting shape, called a prototile, has rotational wallpaper symmetry and unit area. **(Rows C - F)** Construct a Hamiltonian path that visits all subsquares in the prototile in four steps. The Inside-Out Hilbert Curve of order  $n$  can then be constructed iteratively using this path as the base motif. **(Row C)** Beginning at the start square, follow the left-hand rule along the inside of the prototile's boundary until the path hits the subsquare two above the end square. **(Row D)** Make a U-turn, then follow the right-hand rule back through unvisited subsquares until the path returns to the subsquare directly to the right of the start square. **(Row E)** Treat  $2 \times 2$  groups of the remaining subsquares as super-subsquares and draw a partial path through them. **(Row F)** Place a Hilbert base motif into each super-subsquare, suitably oriented, to complete the path. Path starts and ends at the red arrows.

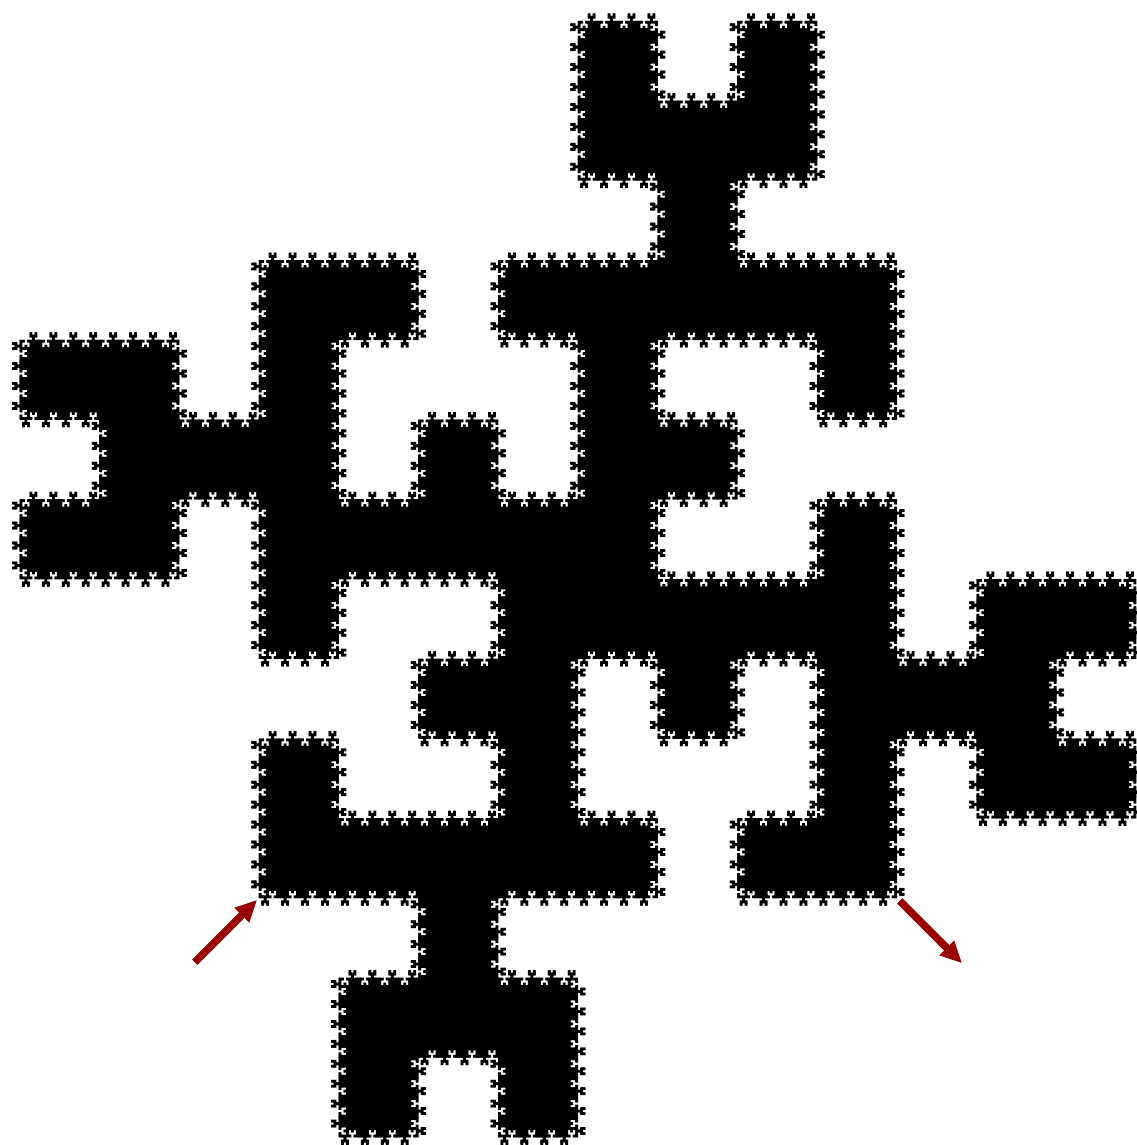

**Fig. S7. The Inside-Out Hilbert Curve, second order, second iteration.**

The self-avoiding, space-filling path containing 1,048,575 segments that outlines the second-order Inside-Out Hilbert Curve. Second iteration of the motif for  $n = 2$  in Figure SS6. Path starts and ends at the red arrows. Zoom in to see additional detail.

**Fig. S8.**

**Properties of the tension globule.**

(A) Histogram of contact probability exponents of 450 individual tension globules of length 10Mb (shown in Fig 4C) measured between distances of 15kb and 1Mb. (B) Contact map for the tension globule, aggregated over 450 simulations. (C) Average radius of gyration as a function of polymer length scales with exponent around  $1/3$ , indicating a dense spherical structure. Error bars show standard deviation. (D) Tension globules have a linear axis at large scales. For tension globules ( $R = 2000$ ) and the fractal globules ( $R = 0.0002$ ) of length 10Mb, angles between the centroids of three consecutive regions of contour length  $L$  are plotted as a function of  $L$ , for  $L < N/3$ . At large distances, obtuse angles predominate in the tension globule. Angle measurements are averaged over each of the  $N/L - 2$  positions in the globule and over 100 simulation replicates. (E) A simulated 10Mb tension globule is shown, and 1Mb sub-regions are highlighted in lateral and axial views. Sub-regions tend to form flat slices, stacked along the linear axis. (F) The distribution of the determinant of the Alexander polynomial, a knot invariant which characterizes the degree of complexity of the knot, computed for 100 tension globules (blue) and 100 equilibrium globules (green). Globules have 4000 monomers each and endpoints are joined to create closed contours. Small values indicate lower complexity. (G) Root mean square end-to-end distance for the tension globule, as a function of genomic distance, exhibits scalings with exponent  $\approx 0.56$  between 2kb and 20kb and  $0.13$  between 100kb and 1Mb.

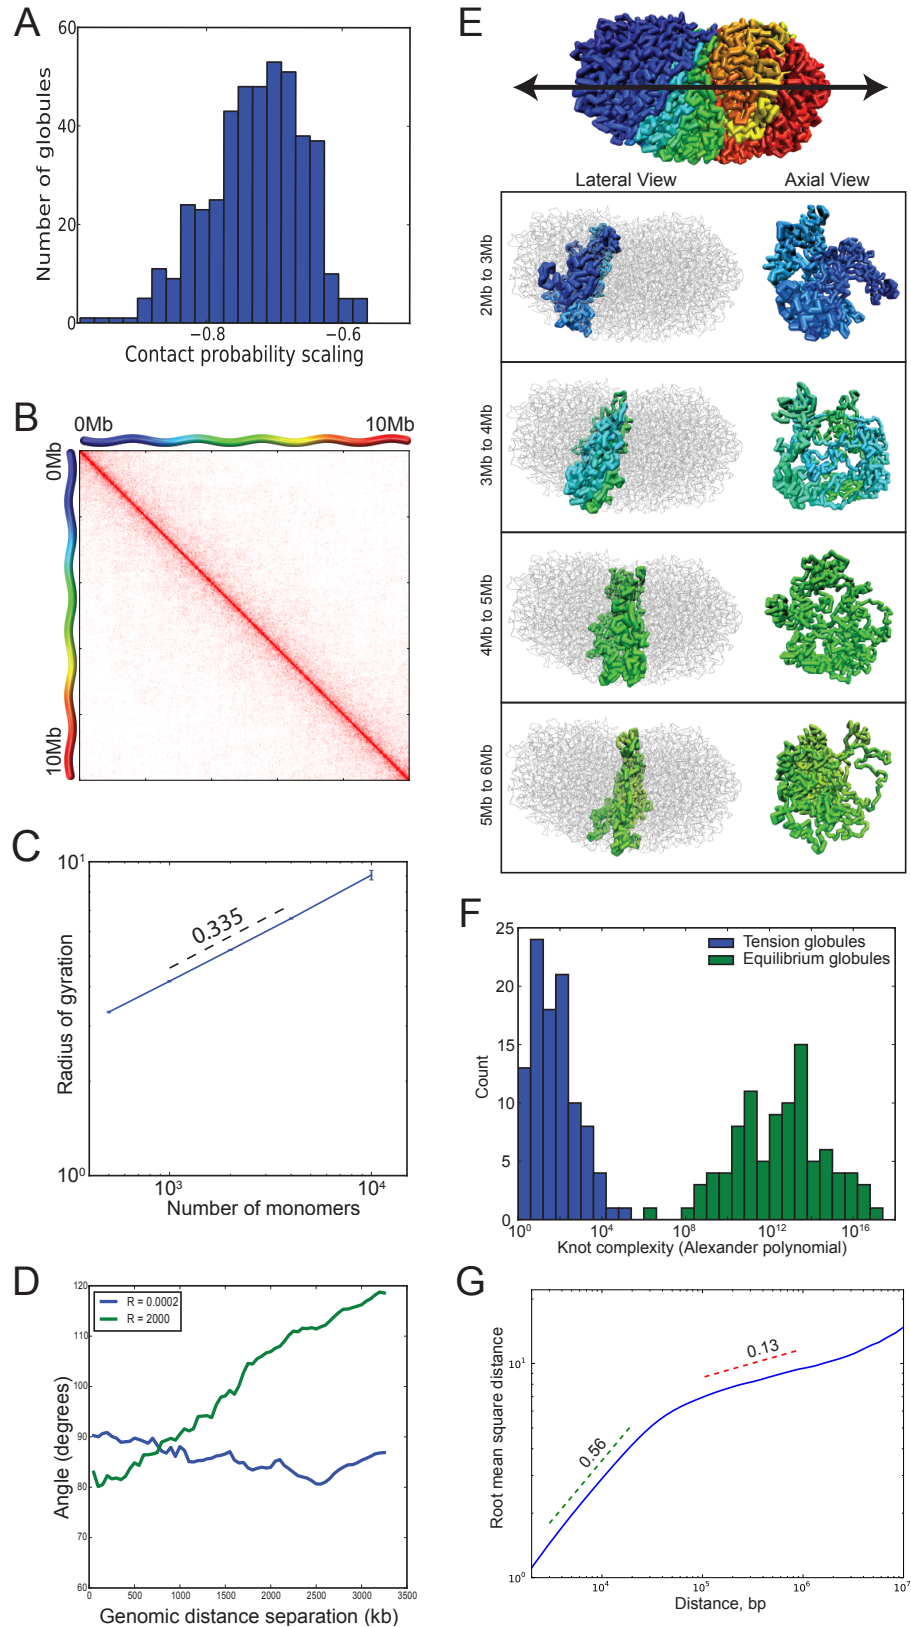



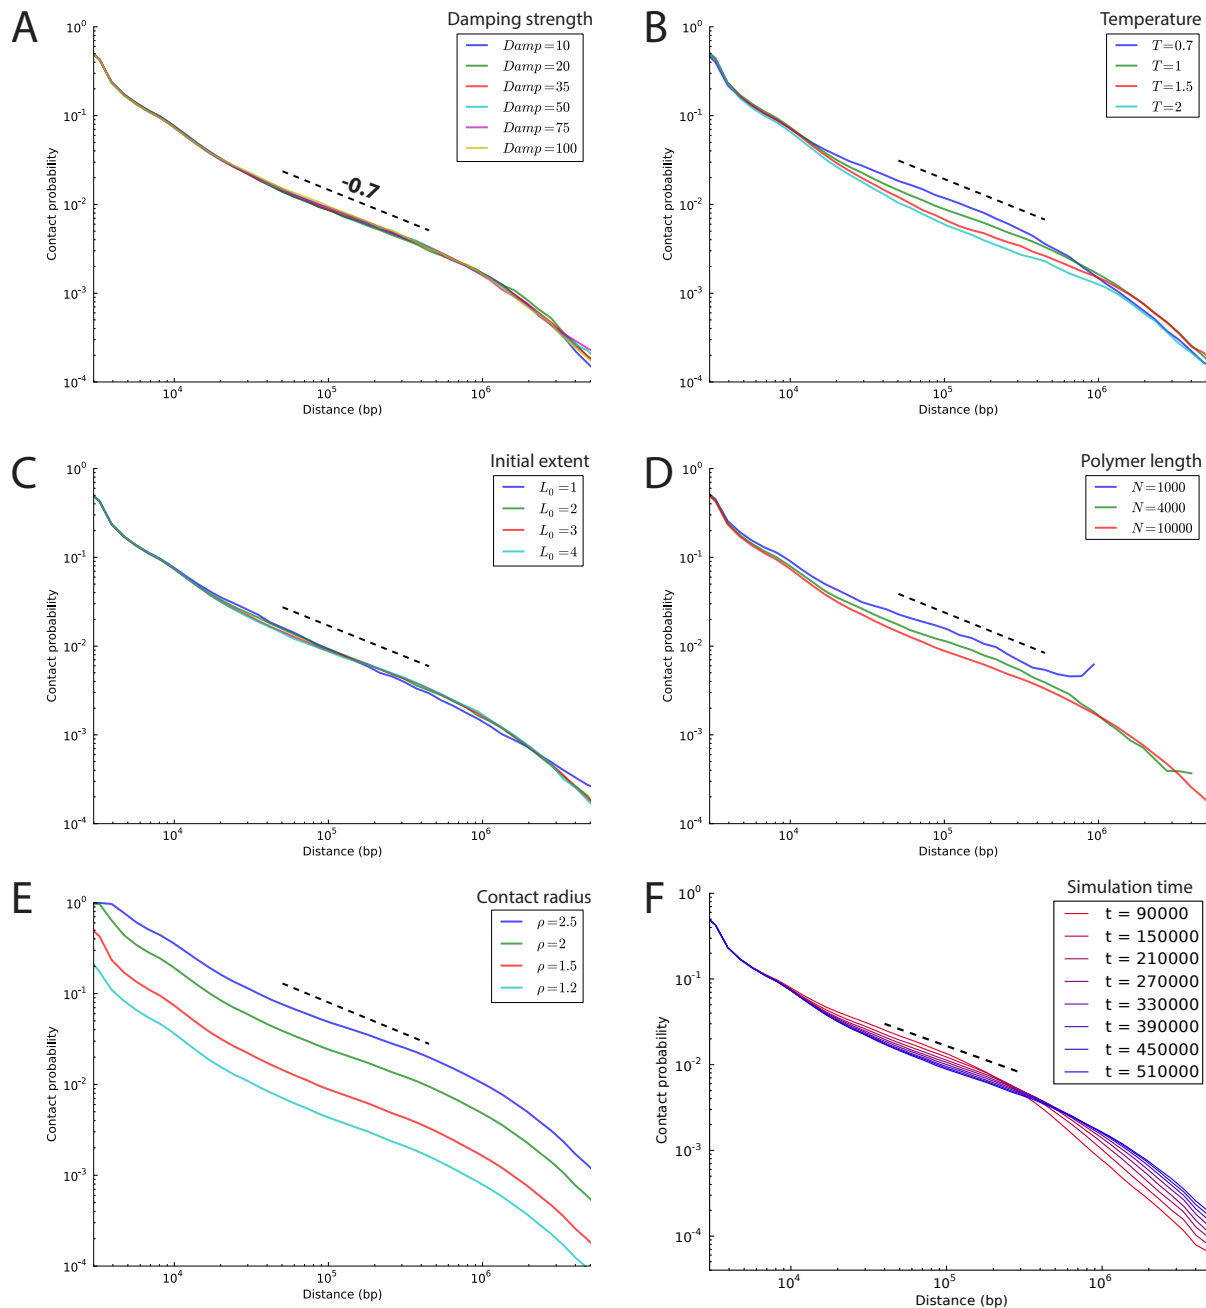

**Fig. S9. Tension globule contact probability is robust to changes in simulation parameters.**

Contact probability plots for tension globules simulated with Lennard-Jones forces and varying parameter values. Dotted line in all plots shows a reference slope of  $-0.7$ . **(A)** Changes in damping strength, measured in time units, do not affect contact probability. **(B)** Increasing temperature decreases mid-range contacts but does not substantially affect the scaling. **(C)** Changes in the extendedness of the initial self-avoiding walk position do not affect contact probability. **(D)** Contact probability scalings are consistent for a range of polymer lengths. **(E)** Increasing the distance threshold for contacts increases the raw number of contacts counted but does not substantially affect the scaling. **(F)** Early in collapse, a scaling of  $\gamma \approx 0.7$  emerges at short distances. After full collapse, the scaling extends to larger distances and does not change significantly with increased simulation time.

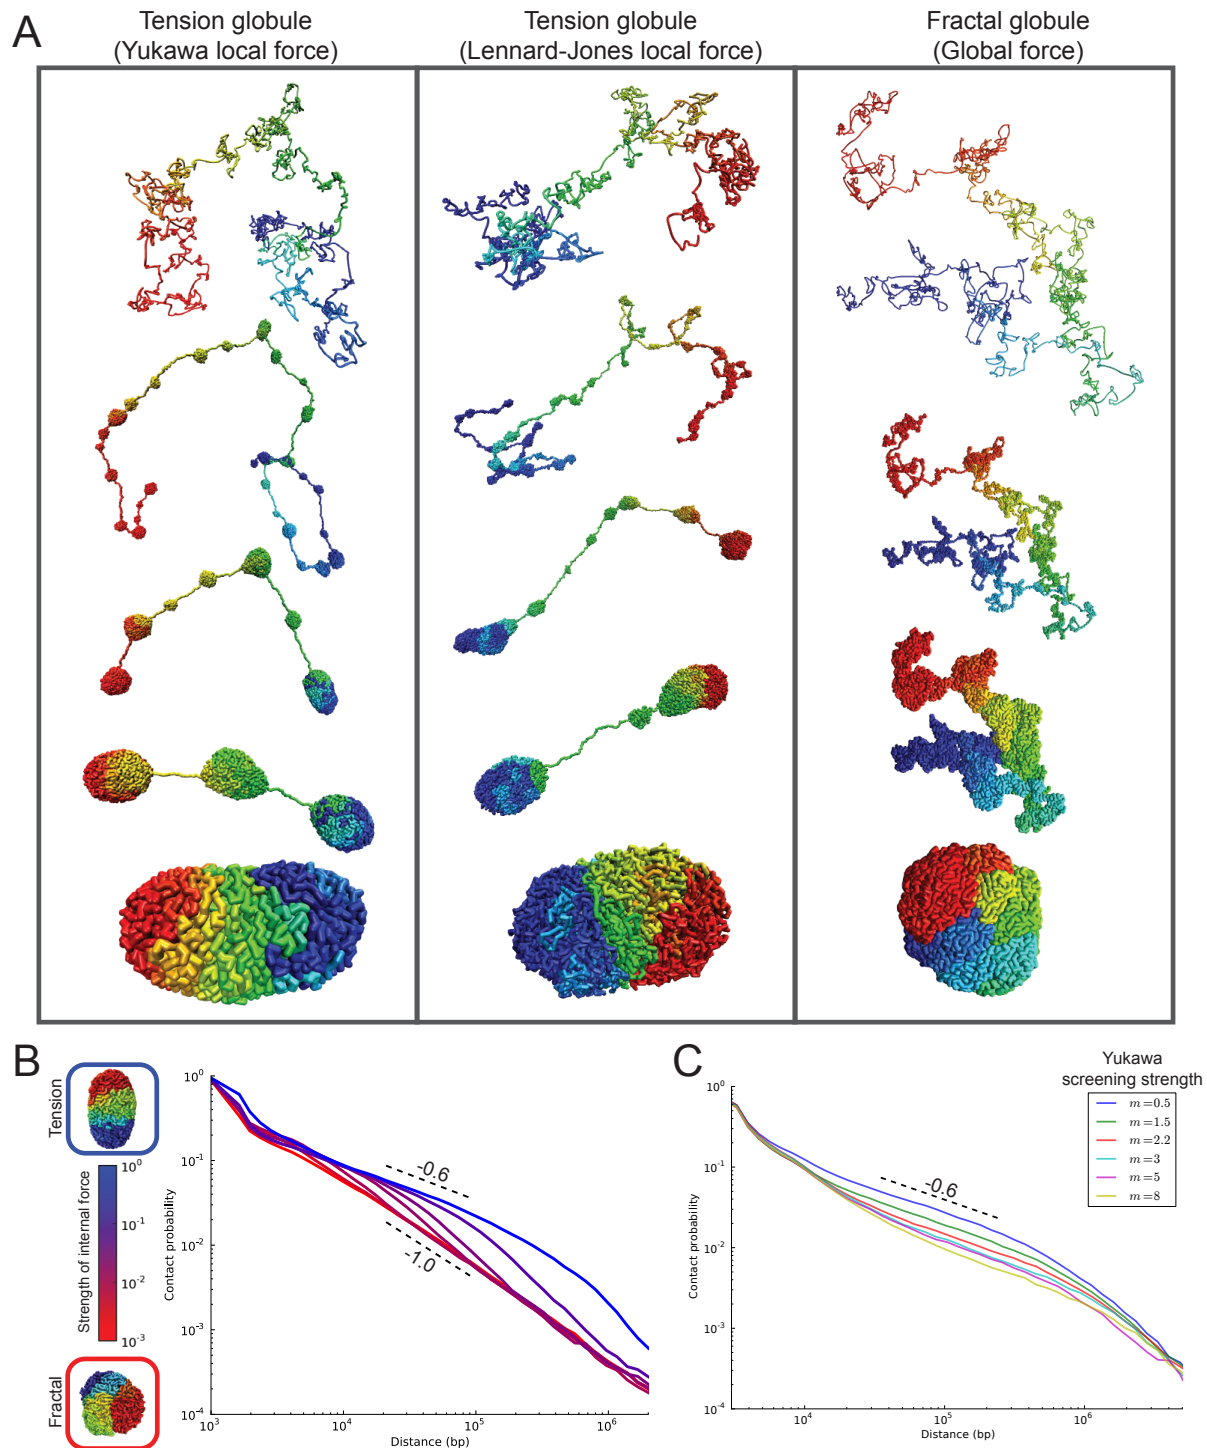

**Fig. S10. Comparison of the fractal globule and tension globules with Lennard-Jones and Yukawa potentials.** (A) Collapse process and contact probability scaling for the tension globule and the fractal globule. *Left*: tension globule formed with inter-monomeric attractive forces modeled by the Yukawa potential. *Middle*: tension globule formed with inter-monomeric attractive forces modeled by the Lennard-Jones potential. *Right*: fractal globule formed with a global crowding forces, modeled by a weak spring potential drawing all monomers towards a central position. (B) Contact probability of the fractal-tension transition simulated using Yukawa forces. Strength of the external force is held constant while strength of the Yukawa internal force is varied. When internal forces are weak, collapse is fractal (red,  $\gamma \approx 1.0$ ); when internal forces are strong, collapse is tension-driven (blue,  $\gamma \approx 0.6$ ). (C) Contact probability of tension globules with Yukawa forces. Scaling is consistent across a wide range of screening strengths.

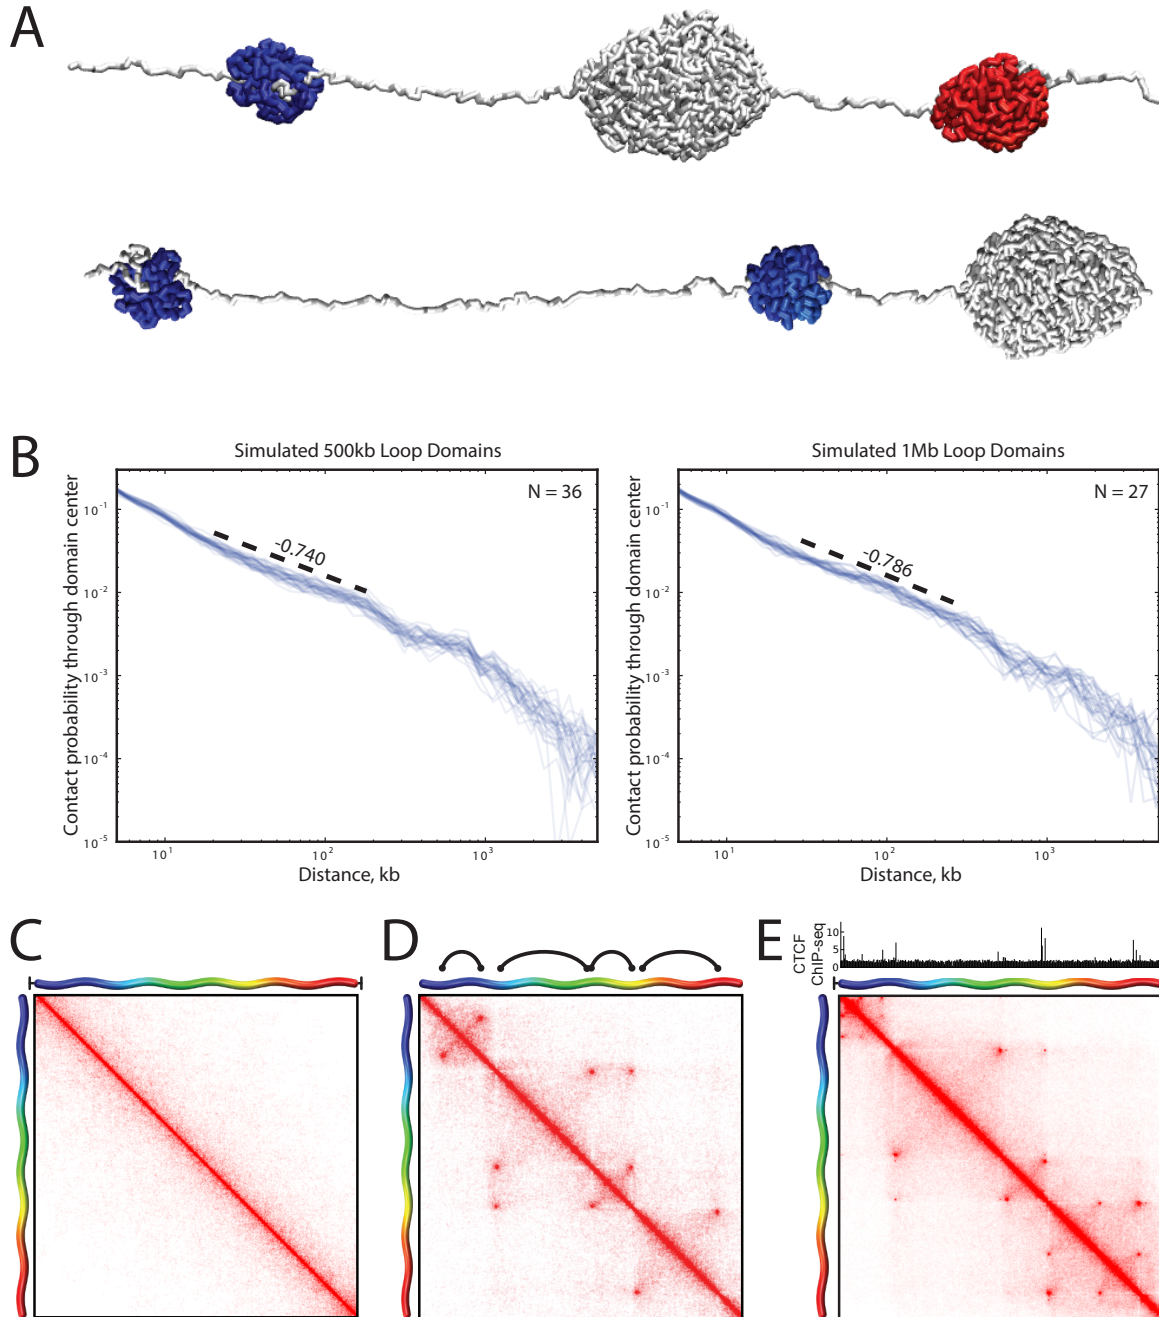

**Fig. S11. Loops introduced during tension globule collapse cause domains to form between the loop anchors.**

(A) Two examples of tension globule loop simulations with length 3Mb and endpoints tethered 100 distance units apart. Loops are formed as shown in Fig 4D. In each structure, the region between select pairs of loop anchors is highlighted in color; between replicates, sub-globules form in different locations but are frequently anchored by loops. (B) Contact probability in a 100kb window through the center of simulated 500kb (left) and 1Mb (right) tension globule loop domains exhibit scalings of  $\gamma \approx 0.75$  extending to the domain boundary, recapitulating Hi-C measurements. (C) Contact map for a 3Mb tension globule with tethered endpoints but no loops. Because sub-globules form at different locations, no domains emerge (compare to Fig S8B). (D) Contact map for non-tethered simulations with the same loops as Fig 4D. (E) Contact map for simulations in which loops were chosen with probabilities based on CTCF ChIP-seq data as described in Section III.b.ii.

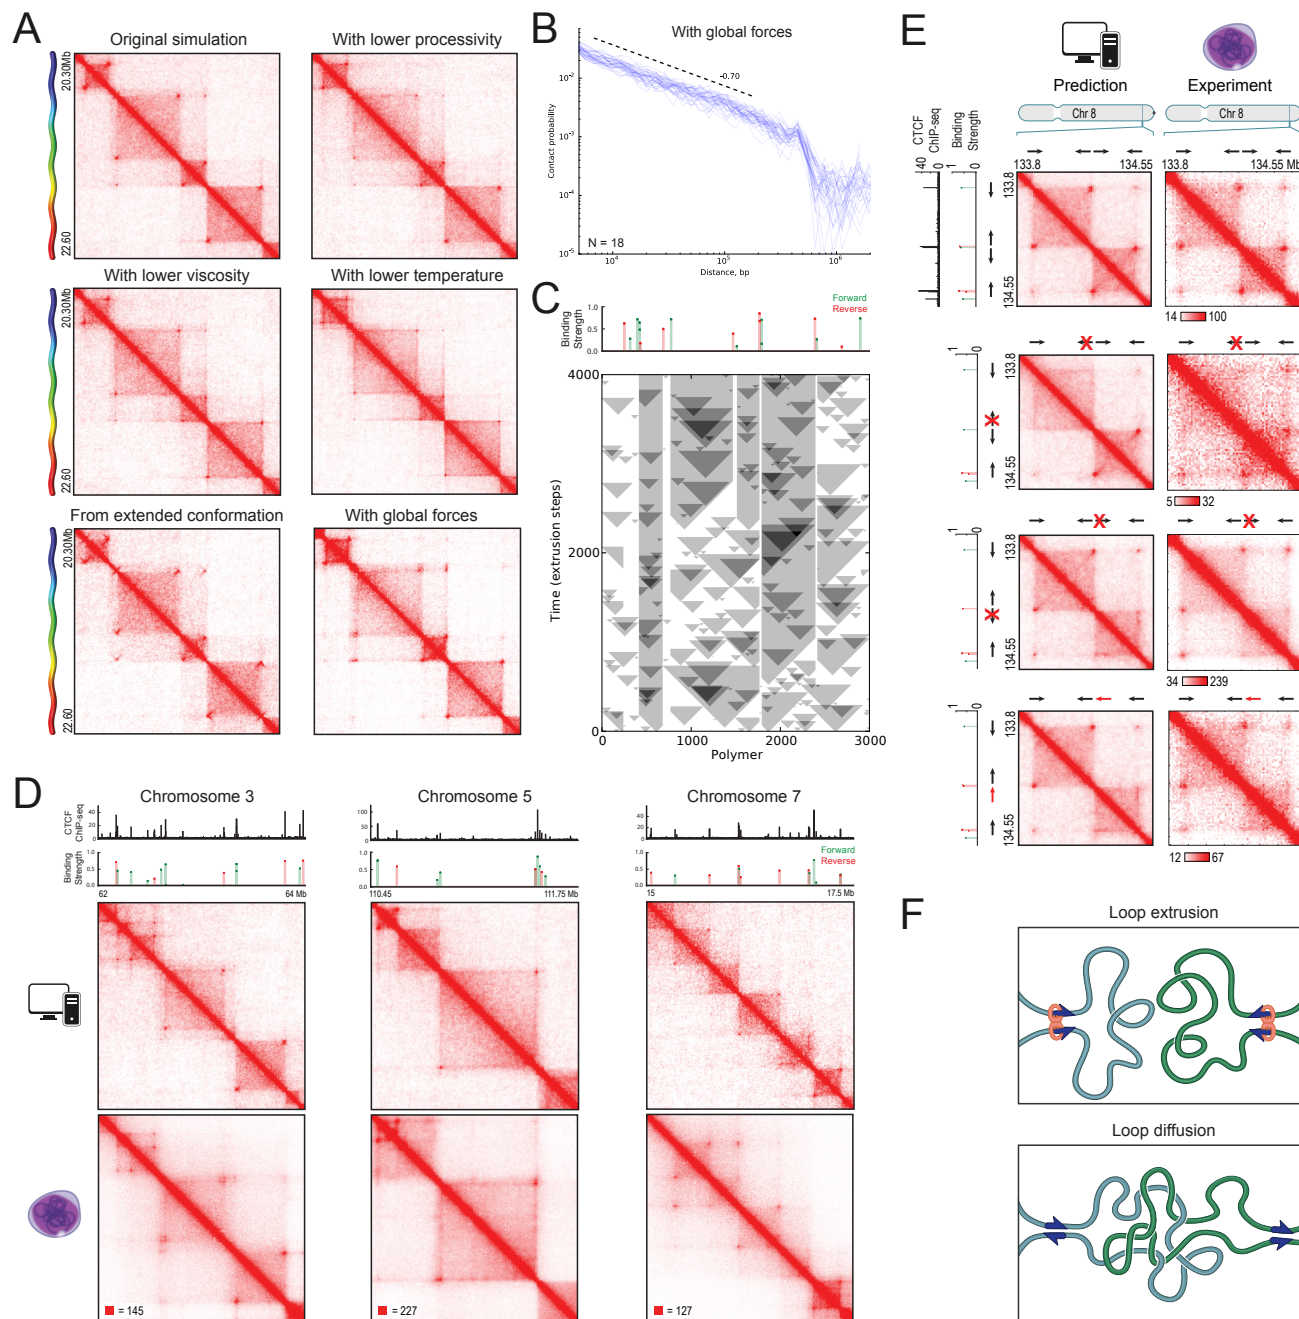

**Fig. S12. The extrusion model robustly recapitulates Hi-C contact maps.**

(A) Extrusion simulations performed with lower viscosity ( $t_{damp} = 30$ ), with lower temperature ( $T = 1.0$ ), starting from an extended polymer, or using a global potential instead of inter-monomeric forces ( $T = 0$ ) are nearly identical to the original simulation shown in Fig 5D ( $T = 2.0$ ,  $t_{damp} = 10$ ). All simulations recapitulate Hi-C data well. (B) Contact probability in a 100kb slice through the center of 18 domains of size 980kb simulated using the extrusion model and global crowding forces. Although global forces produce a scaling around  $\gamma \approx 1$  in the absence of other effects, loop extrusion yields a scaling with  $\gamma \approx 0.7$ . (C) A representative schematic of the loop extrusion dynamics of simulations shown in Fig 5D, showing the association, extrusion, binding, and dissociation of extrusion complexes over time. At time  $T$ , if an extrusion complex has bound to points  $A$  and  $B$  on the polymer, the line from  $(T, A)$  to  $(T, B)$  is shaded gray. (D) Contact maps of three additional regions on chromosomes 3, 5, and 7 were robustly recapitulated by the extrusion model, simulated directly from CTCF ChIP-seq signals. A ChIP-seq normalization constant was the only free parameter. (E) Contact maps of wild-type and three genome engineering experiments from Fig 7A. The simulations of wild-type and each engineered condition were produced before any CRISPR experimental data was available and were based only on the wild-type contact map. These are *de novo* predictions in the strictest sense. (F) *Above*: Loop extrusion produces unentangled domains and loops at convergently-oriented CTCF motifs. *Below*: In the classic loop diffusion model, loops form when freely diffusing loop anchors encounter each other in 3D. This behavior would cause the intervening DNA to be highly entangled and would not show any orientation preference at the loop anchor CTCF motifs.

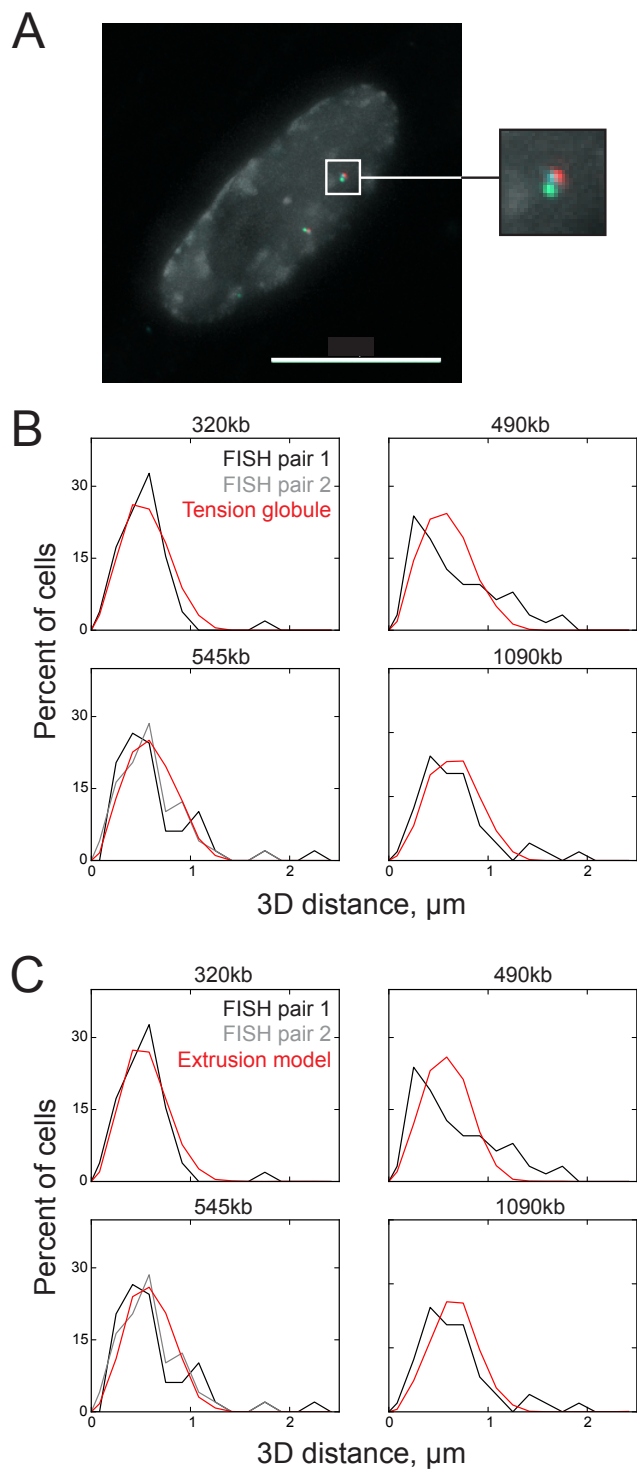

**Fig. S13. Intra-domain distances measured by 3D-FISH match simulation results for both tension globules and the extrusion model.**

(A) Sample 3D-FISH measurement. Genomic loci are marked in red, blue, and green; DAPI stain is in gray, highlighting the nucleus. Scale bar is 15 $\mu\text{m}$ . (B, C) Distributions of 3D distances between pairs of loci obtained experimentally using 3D-FISH (black, gray) and in simulated tension globules (B) or simulated extruded domains (C) for four different genomic distances from 320kb to 1090kb. Agreement of simulation to experiment (Kolmogorov-Smirnov statistic with tension globule: 0.15; K-S statistic with extrusion model: 0.16) is as good as agreement between two experimental measurements (K-S statistic: 0.18).

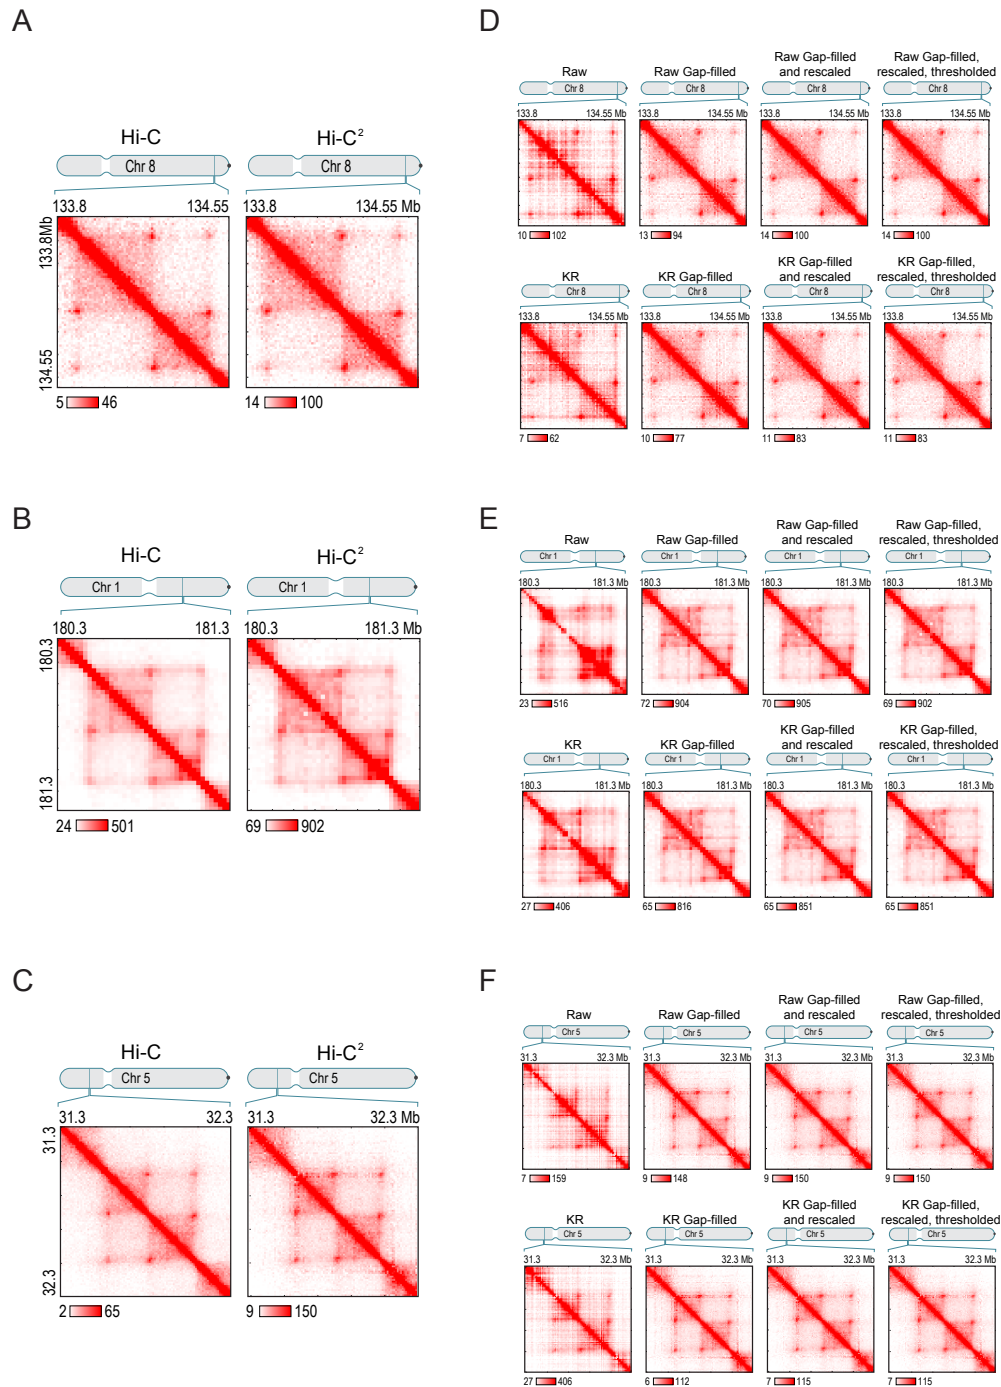

**Fig. S14. Analysis and Validation of Hi-C<sup>2</sup>.**

(A,B,C) The *in situ* Hi-C contact map of all regions probed in this study (region 1: chr 8:133.8-134.55Mb, (A); region 2: chr1:180.3-181.3Mb, (B); region 3: chr5:31.3-32.3Mb, (C)) in wild-type HAP1 cells (left) closely resembles a Hi-C<sup>2</sup> contact map for the same region (right). (D,E,F) Hi-C<sup>2</sup> data shown for region 1 (D), region 2 (E), and region 3 (F) using different flavors of normalization. Raw unnormalized data is shown in the top left corner and labeled as “Raw”. All different normalization methods are detailed in section I.e.iv. The method “Raw Gap-filled, rescaled, thresholded” was used for all Hi-C<sup>2</sup> data shown in the main figures.

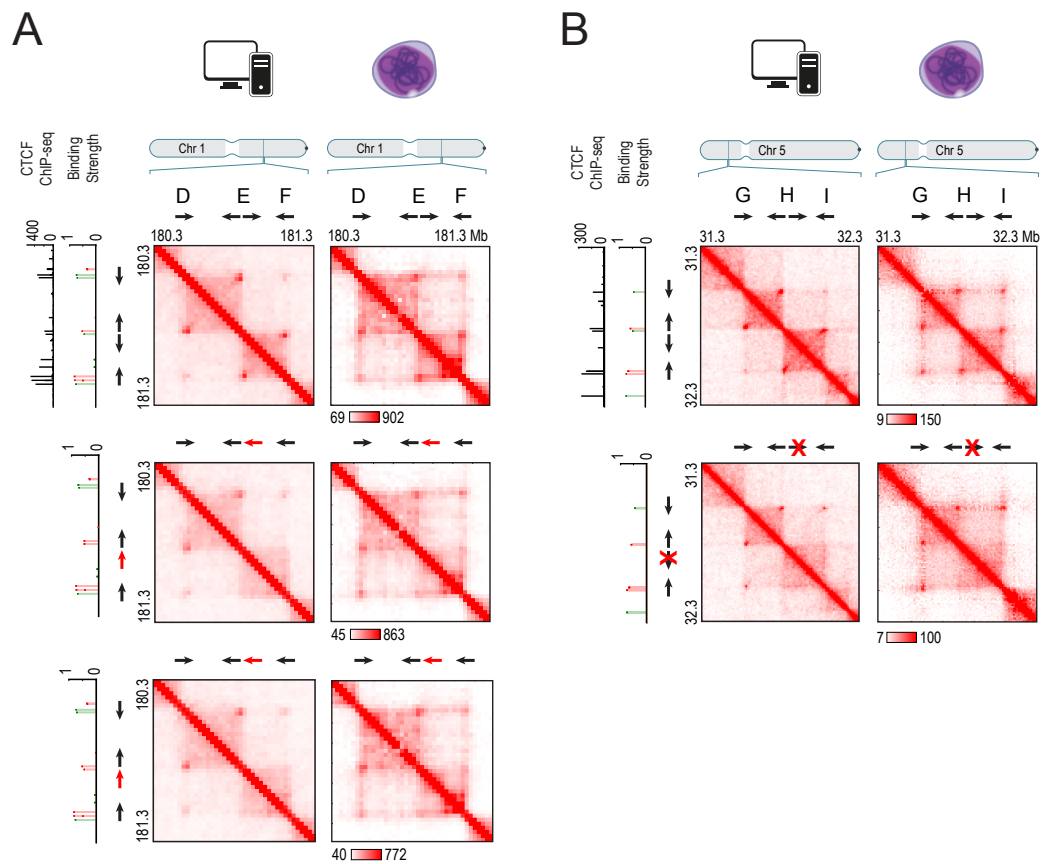

**Fig. S15. Additional CRISPR mutants.**

(A) Two additional CRISPR mutants for Region 2 (chr1:180.3-181.3 Mb). First row: The contact map for the wild-type locus, calculated using *in silico* simulations (left), closely matches the map observed using Hi-C<sup>2</sup> experiments (right). Second row: Replacement of the E/forward motif with the E/reverse motif eliminates the E-F loop. Third row: Inversion of the E/forward motif eliminates the E-F loop. (B) An additional CRISPR mutant for Region 3 (chr5:31.3-32.3 Mb). First row: The contact map for the wild-type locus, calculated using *in silico* simulations (left), closely matches the map observed using Hi-C<sup>2</sup> experiments (right). Second row: Deletion of the H/forward motif eliminates the H-I loop.

**Fig. S16.**

**Hi-C and Virtual 4C experimental data reflect accuracy of predictions based on the convergent rule, including both movement of individual loop anchors and disruption of entire loops.**

(A) GM12878 ChIP-Seq data is shown as a reference for region 1. (B) Virtual 4C plots of the A/forward deletion CRISPR mutant Hi-C<sup>2</sup> data. For panels (B-G), the left column is always anchored at chr8:133,885,000 (locus A, 5kb resolution data shown) and the right column is always anchored at chr8:134,460,000 (locus C, 10kb resolution data shown). When A/forward is deleted, the A-B and A-C loops disappear, but the B-C loop is unaffected. (C) Deletion of B/Reverse eliminates the A-B loop. (D) Deletion of B/Forward eliminates the B-C loop. (E) Inversion of B/Forward eliminates the B-C loop. (F) Simultaneous deletion of B/Reverse and inversion of B/Forward eliminates the B-C loop. (G) Inversion of both B/Forward and B/Reverse does not eliminate loops. (H) Virtual 4C and heatmap blowouts of wild-type Hap1 Hi-C<sup>2</sup> data anchored at the A locus (blue) and at the C locus (green). The shift in the peak intensity of the A-B and B-C loop signals at B mirrors the 6kb distance between the B/Reverse and B/forward motifs (ChIP-Seq). (I) Virtual 4C and heatmap blowouts of wild-type Hap1 Hi-C<sup>2</sup> data (blue) and B/forward deletion Hi-C<sup>2</sup> data, both anchored at the A locus. Both of the A-B loops shown are anchored at the B/Reverse location and no shift in intensity of signal is seen. (J) Virtual 4C and heatmap blowouts of wild-type Hap1 Hi-C<sup>2</sup> data (blue) and B/Reverse deletion + B/forward inversion Hi-C<sup>2</sup> data, both anchored at the A locus. In this case, the A-B loop in the mutant case forms between A and the inverted B/forward motif, and the shift in loop intensity to the new location is visible. (K) Virtual 4C and heatmap blowouts of wild-type Hap1 Hi-C<sup>2</sup> data (blue) and B/Reverse and B/forward double inversion, both anchored at the A locus. In this case, the A-B loop in the mutant case forms between A and the inverted B/forward motif, and the shift in loop intensity to the new location is visible.

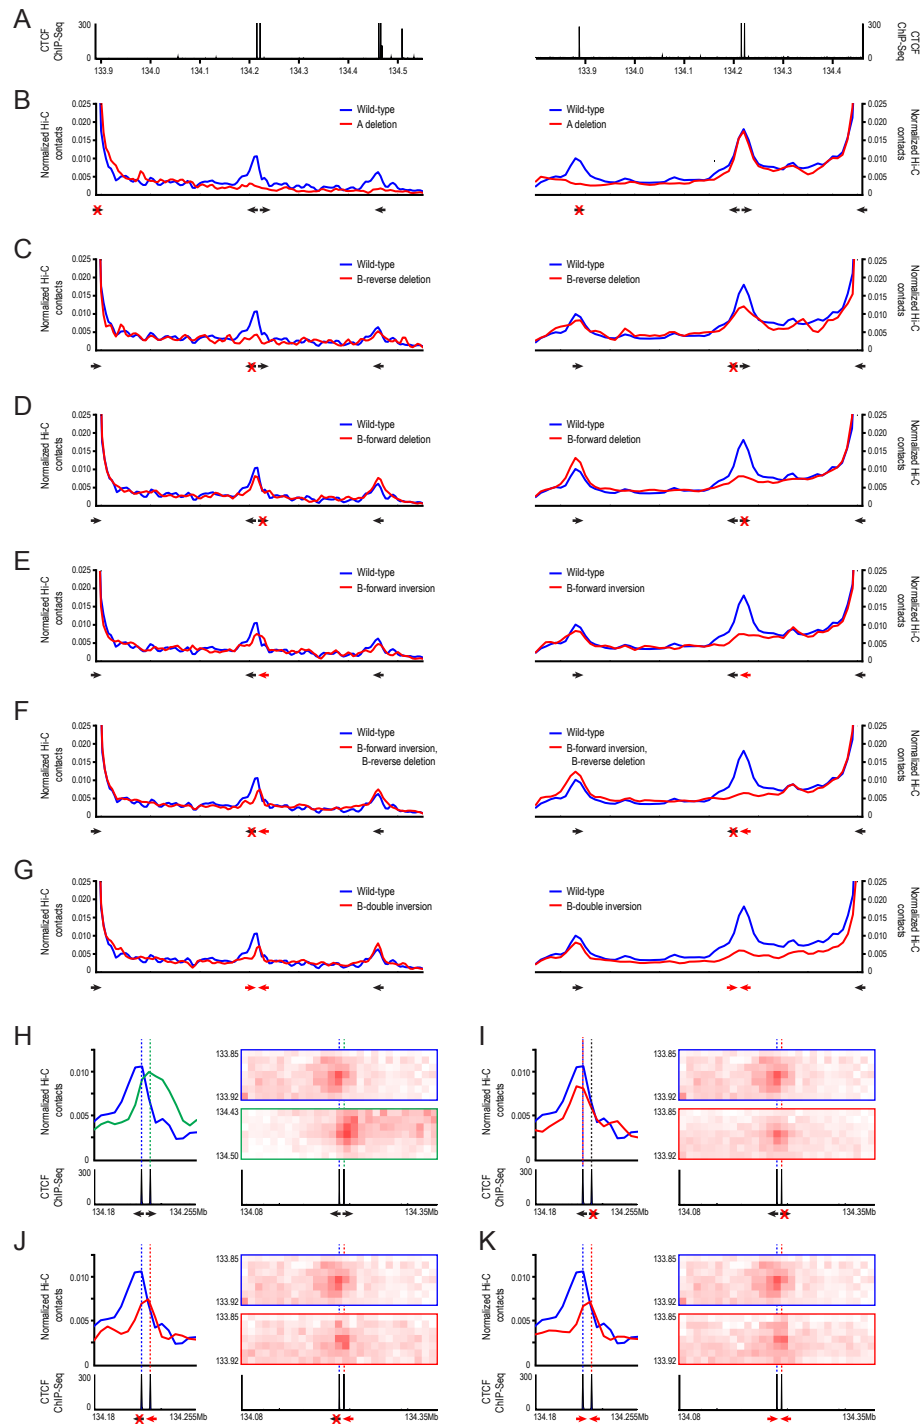



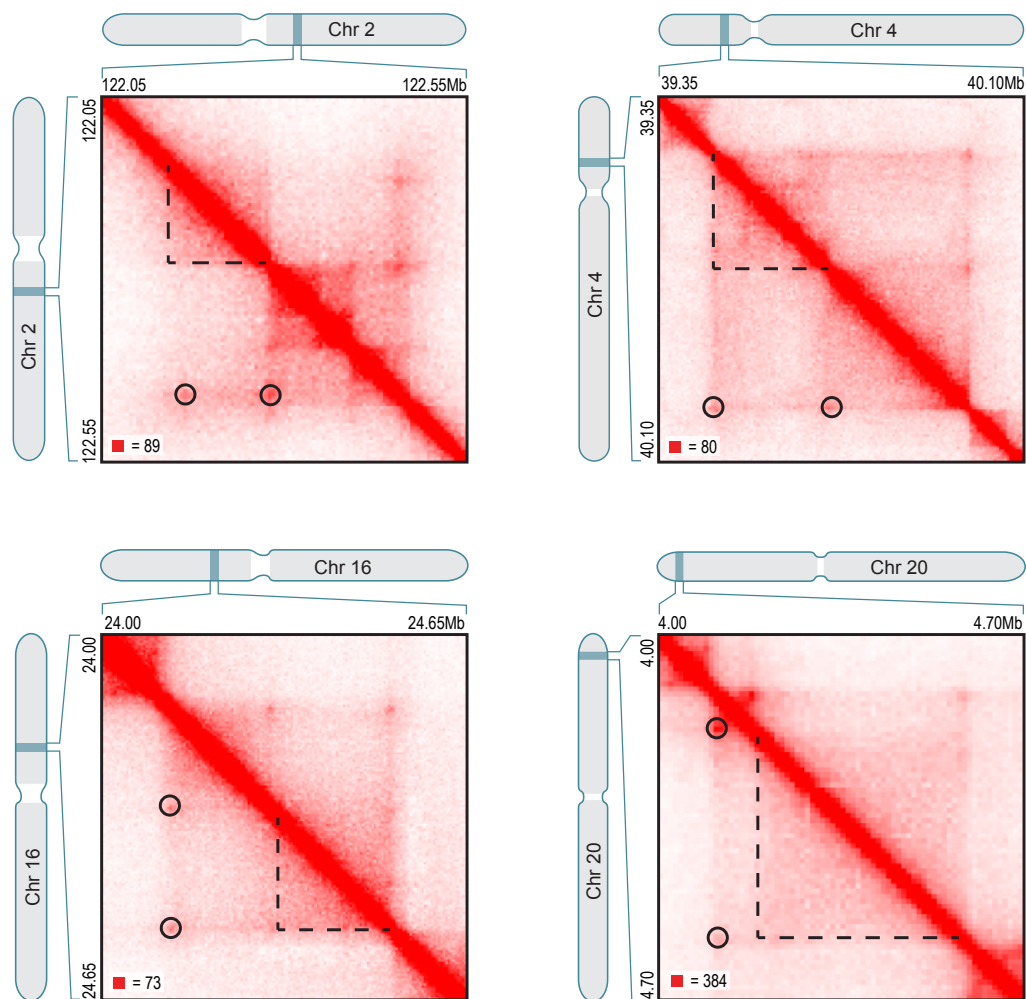

**Fig. S17. Contact domains can form between consecutive loop anchors that do not loop to one another.**

When three consecutive loci, A, B and C, form two loops such that A loops to B and C but B and C do not loop to each other, the extrusion model predicts that a domain will still form between B and C. This is because an extrusion complex that lands between B and C will be excluded from the A-B region by the A-B loop; instead, it tends to bring points within the B-C interval together, forming an “exclusion domain.” When we examined the wild-type GM12878 Hi-C map for such loci, we found that exclusion domains were prevalent: the B-C region in 158 cases coincided with an annotated contact domain, a 6.3-fold enrichment (loci near compartment flips were excluded). Four example exclusion domains are shown here, with the A-B and A-C loops circled and the exclusion domain outlined.

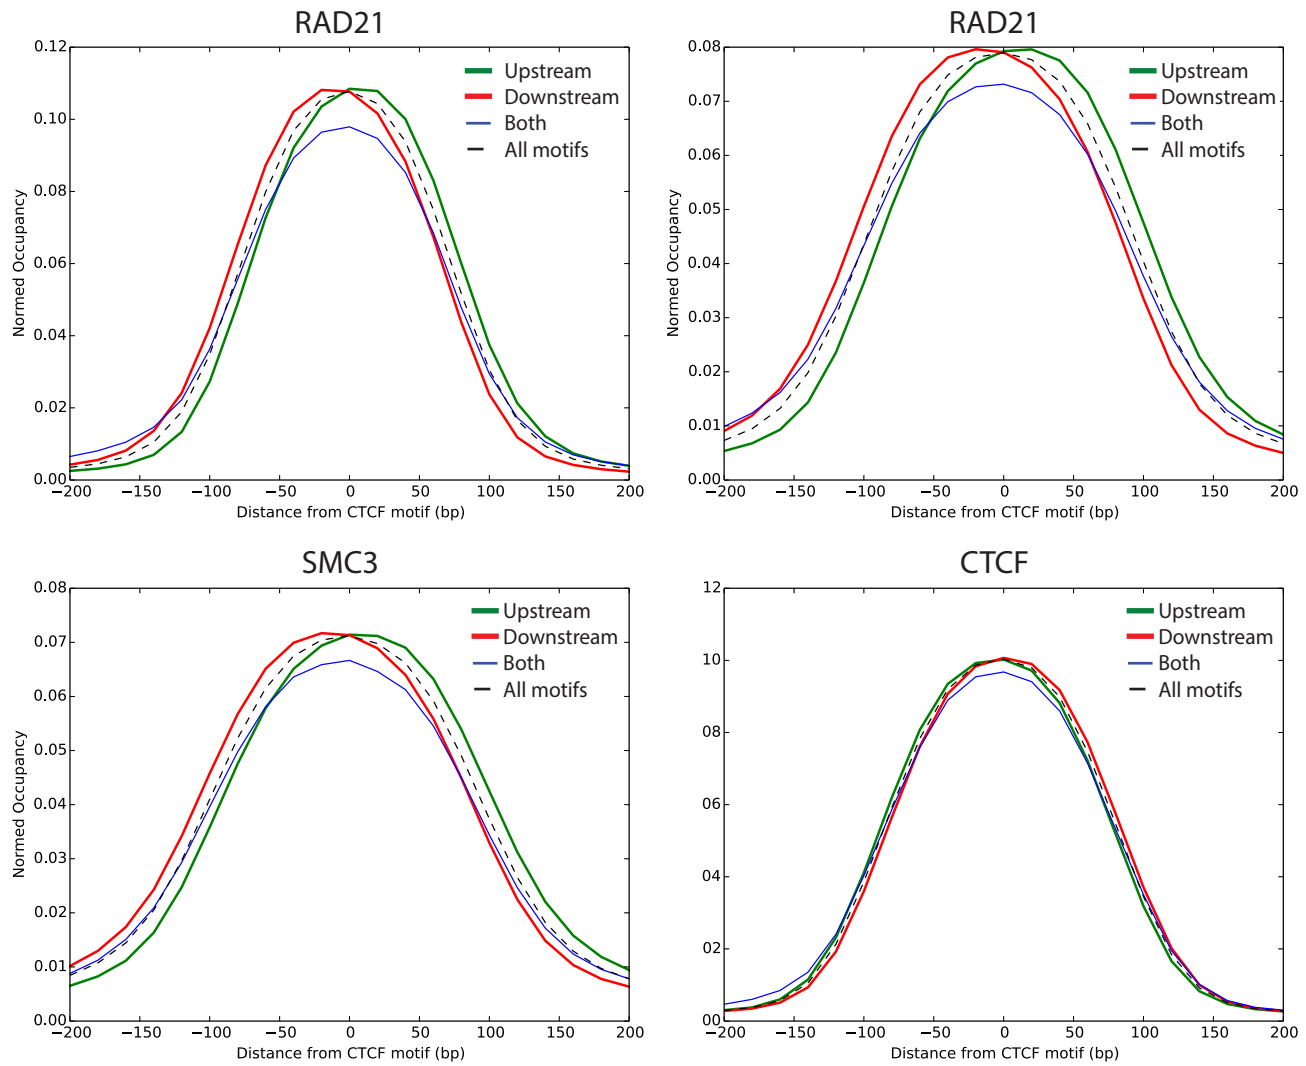

**Fig. S18. Interactions of RAD21 and SMC3 at loop anchors are shifted  $\approx 20$ bp towards the loop interior.** ChIP-seq signal for RAD21 (two replicates), SMC3, and CTCF interactions aggregated over all unique CTCF motifs at upstream loop anchors, at downstream loop anchors, at both loop anchors, or all CTCF motifs. Interactions of RAD21 and SMC3 are shifted roughly 20bp towards the loop interior.
